# Supplementary material for: Identification of Loci and Pathways Associated with Heifer Conception Rate in U.S. Holsteins
Source: PubMed Central journal article supplement (PMC7397161; doi:10.3390/genes11070767), 2020-07-08
Supplement: genes-11-00767-s001.pdf [file genes-11-00767-s001.pdf]

Supplementary Materials:

**Supplementary Table 1.** Loci Associated with Heifer Conception Rate at First Breeding

| BTA <sup>1</sup> | UMD 3.1 Position <sup>2</sup> | SNP ID <sup>3,4</sup> | p-value <sup>5</sup>                                 | Models <sup>6</sup>  | Positional Candidate Genes <sup>7</sup> | Proportion of Variance Explained <sup>8</sup> |
|------------------|-------------------------------|-----------------------|------------------------------------------------------|----------------------|-----------------------------------------|-----------------------------------------------|
| 1                | 3,546,098                     | rs136767715           | 7.56 X 10 <sup>-10</sup>                             | dominant             | TIAM1 <sup>†</sup>                      | 0.02                                          |
| 1                | 7,862,063                     | rs135020930           | 6.11 X 10 <sup>-15</sup><br>6.11 X 10 <sup>-15</sup> | additive<br>dominant |                                         | 0.03<br>0.03                                  |
| 1                | 11,250,683                    | rs110647268*          | 9.77 X 10 <sup>-16</sup><br>9.77 X 10 <sup>-16</sup> | additive<br>dominant |                                         | 0.03<br>0.03                                  |
| 1                | 11,812,309                    | rs109447046           | 8.50 X 10 <sup>-9</sup>                              | dominant             |                                         | 0.02                                          |
| 1                | 16,446,932                    | rs110075902*          | 1.29 X 10 <sup>-8</sup><br>3.07 X 10 <sup>-8</sup>   | additive<br>dominant |                                         | 0.02<br>0.02                                  |
| 1                | 29,618,772                    | rs43224096            | 2.35 X 10 <sup>-16</sup><br>1.67 X 10 <sup>-18</sup> | additive<br>dominant |                                         | 0.03<br>0.04                                  |
| 1                | 32,700,496                    | rs43226666*           | 1.09 X 10 <sup>-8</sup><br>1.55 X 10 <sup>-11</sup>  | additive<br>dominant | CADM2 <sup>#</sup>                      | 0.02<br>0.02                                  |
| 1                | 45,719,982                    | rs43682172            | 5.72 X 10 <sup>-12</sup>                             | dominant             | ABI3BP <sup>†</sup>                     | 0.02                                          |
| 1                | 62,056,267                    | rs42760220            | 3.48 X 10 <sup>-9</sup>                              | dominant             |                                         | 0.02                                          |
| 1                | 62,158,499                    | rs42675527            | 5.50 X 10 <sup>-10</sup><br>6.96 X 10 <sup>-13</sup> | additive<br>dominant | LOC538060                               | 0.02<br>0.03                                  |
| 1                | 64,591,504                    | rs43652271            | 2.57 X 10 <sup>-10</sup><br>4.01 X 10 <sup>-12</sup> | additive<br>dominant | UPK1B <sup>†</sup>                      | 0.02<br>0.02                                  |
| 1                | 64,894,430                    | rs42911131            | 2.48 X 10 <sup>-11</sup>                             | dominant             | CD80 <sup>†</sup>                       | 0.02                                          |
| 1                | 86,830,692                    | rs110457263           | 1.40 X 10 <sup>-8</sup>                              | additive             |                                         | 0.02                                          |
| 1                | 94,300,486                    | rs41606324*           | 6.28 X 10 <sup>-24</sup><br>3.65 X 10 <sup>-24</sup> | additive<br>dominant | NLGN1 <sup>†</sup>                      | 0.05<br>0.05                                  |
| 1                | 94,998,936                    | rs135160436           | 1.17 X 10 <sup>-8</sup>                              | dominant             | SPATA16 <sup>†</sup>                    | 0.02                                          |
| 1                | 99,584,226                    | rs110848318           | 1.05 X 10 <sup>-11</sup>                             | dominant             |                                         | 0.02                                          |
| 1                | 112,961,101                   | rs110435444           | 4.04 X 10 <sup>-10</sup><br>1.09 X 10 <sup>-12</sup> | additive<br>dominant | PLCH1 <sup>†</sup>                      | 0.02<br>0.03                                  |
| 1                | 117,359,373                   | rs134846486           | 1.78 X 10 <sup>-9</sup>                              | dominant             |                                         | 0.02                                          |
| 1                | 122,822,402                   | rs110884711*          | 1.82 X 10 <sup>-8</sup>                              | dominant             | PLSCR5 <sup>†</sup>                     | 0.02                                          |
| 1                | 123,956,245                   | rs132851673           | 6.18 X 10 <sup>-10</sup>                             | dominant             |                                         | 0.02                                          |
| 1                | 126,235,693                   | rs136458590*          | 8.06 X 10 <sup>-13</sup>                             | dominant             | SLC9A9 <sup>†</sup>                     | 0.03                                          |

|   |             |              |                                                      |                      |                                                         |              |
|---|-------------|--------------|------------------------------------------------------|----------------------|---------------------------------------------------------|--------------|
| 1 | 130,576,374 | rs110960328  | 2.10 X 10 <sup>-10</sup><br>1.00 X 10 <sup>-12</sup> | additive<br>dominant | KPNA6 <sup>†</sup><br>LOC104971035 <sup>†</sup><br>RBP1 | 0.02<br>0.03 |
| 1 | 139,950,787 | rs43278206   | 1.25 X 10 <sup>-8</sup>                              | dominant             | MRPL3                                                   | 0.02         |
| 1 | 154,853,461 | rs134813046  | 1.52 X 10 <sup>-8</sup>                              | dominant             |                                                         | 0.02         |
| 1 | 157,576,622 | rs136888926* | 1.87 X 10 <sup>-8</sup>                              | dominant             |                                                         | 0.02         |
| 1 | 158,010,340 | rs43289085   | 4.94 X 10 <sup>-14</sup><br>1.28 X 10 <sup>-14</sup> | additive<br>dominant |                                                         | 0.03<br>0.03 |
| 2 | 15,775,602  | rs136049910  | 3.82 X 10 <sup>-9</sup>                              | additive             | TRNASTOP-<br>UCA UBE2E3                                 | 0.02         |
| 2 | 32,783,586  | rs135787342  | 4.20 X 10 <sup>-8</sup>                              | dominant             | FIGN <sup>†</sup>                                       | 0.01         |
| 2 | 36,425,765  | rs136627254  | 2.78 X 10 <sup>-8</sup>                              | dominant             | PLA2R1 <sup>†</sup>                                     | 0.02         |
| 2 | 65,493,191  | rs109322207  | 4.40 X 10 <sup>-8</sup><br>4.96 X 10 <sup>-10</sup>  | additive<br>dominant |                                                         | 0.01<br>0.02 |
| 2 | 72,248,936  | rs110344076  | 6.08 X 10 <sup>-9</sup><br>6.08 X 10 <sup>-9</sup>   | additive<br>dominant | EPB41L5 <sup>†</sup>                                    | 0.02<br>0.02 |
| 2 | 80,429,623  | rs134254979  | 1.98 X 10 <sup>-12</sup>                             | dominant             | LOC104971267 <sup>†</sup>                               | 0.02         |
| 2 | 84,127,565  | rs110922881* | 8.14 X 10 <sup>-9</sup>                              | dominant             |                                                         | 0.02         |
| 2 | 85,872,885  | rs134179168  | 4.02 X 10 <sup>-9</sup><br>7.47 X 10 <sup>-12</sup>  | additive<br>dominant | PGAP1 <sup>†</sup>                                      | 0.02<br>0.02 |
| 2 | 87,872,337  | rs41616585*  | 4.44 X 10 <sup>-9</sup>                              | dominant             |                                                         | 0.02         |
| 2 | 88,137,677  | rs135769112* | 1.66 X 10 <sup>-17</sup><br>1.66 X 10 <sup>-17</sup> | additive<br>dominant |                                                         | 0.04<br>0.04 |
| 2 | 126,326,843 | rs132632350  | 1.22 X 10 <sup>-10</sup>                             | additive             | AHDC1                                                   | 0.02         |
| 3 | 7,783,286   | rs135239306  | 3.61 X 10 <sup>-10</sup>                             | additive             | ATF6 <sup>†</sup>                                       | 0.02         |
| 3 | 12,500,599  | rs133108396  | 2.97 X 10 <sup>-8</sup>                              | additive             | LOC531264                                               | 0.02         |
| 3 | 14,665,964  | rs136725222  | 8.54 X 10 <sup>-9</sup>                              | dominant             | SEMA4A <sup>†</sup>                                     | 0.02         |
| 3 | 32,269,604  | rs43336503   | 3.39 X 10 <sup>-8</sup>                              | dominant             | CHI3L2 <sup>†</sup>                                     | 0.02         |
| 3 | 37,781,561  | rs137663076  | 4.61 X 10 <sup>-8</sup>                              | recessive            |                                                         | 0.01         |
| 3 | 38,557,710  | rs109265034  | 1.36 X 10 <sup>-8</sup>                              | dominant             |                                                         | 0.02         |
| 3 | 42,093,978  | rs134200102  | 3.78 X 10 <sup>-9</sup>                              | dominant             |                                                         | 0.02         |
| 3 | 49,686,970  | rs136708725  | 3.25 X 10 <sup>-10</sup>                             | dominant             | ABCA4<br>LOC783590                                      | 0.02         |
| 3 | 56,967,816  | rs137196969  | 5.89 X 10 <sup>-9</sup>                              | dominant             |                                                         | 0.02         |
| 3 | 66,777,217  | rs133073532  | 3.25 X 10 <sup>-8</sup><br>4.64 X 10 <sup>-12</sup>  | additive<br>dominant | GIPC2<br>LOC100140103                                   | 0.02<br>0.02 |
| 3 | 77,163,315  | rs136533238  | 1.25 X 10 <sup>-10</sup>                             | dominant             | RPE65 <sup>†</sup>                                      | 0.02         |

|   |             |              |                                                      |                      |                                  |              |
|---|-------------|--------------|------------------------------------------------------|----------------------|----------------------------------|--------------|
| 3 | 89,365,476  | rs137362504  | 3.77 X 10 <sup>-8</sup>                              | recessive            | DAB1 <sup>†</sup>                | 0.02         |
| 3 | 97,680,312  | rs41585055   | 3.86 X 10 <sup>-10</sup>                             | dominant             | AGBL4 <sup>†</sup>               | 0.02         |
| 3 | 98,855,342  | rs43356386   | 4.83 X 10 <sup>-11</sup>                             | dominant             | LOC101906301<br>TRABD2B          | 0.02         |
| 3 | 101,247,684 | rs43361651   | 1.28 X 10 <sup>-8</sup>                              | dominant             | TESK2 <sup>†</sup>               | 0.02         |
| 3 | 116,328,811 | rs133498551  | 4.36 X 10 <sup>-9</sup><br>2.67 X 10 <sup>-9</sup>   | additive<br>dominant | ASB18 <sup>†</sup>               | 0.02<br>0.02 |
| 4 | 5,954,962   | rs137299312  | 1.04 X 10 <sup>-17</sup><br>1.04 X 10 <sup>-17</sup> | additive<br>dominant | VWC2 <sup>†</sup>                | 0.04<br>0.04 |
| 4 | 17,611,774  | rs41659165   | 6.09 X 10 <sup>-9</sup>                              | dominant             | NXP1 <sup>†</sup>                | 0.02         |
| 4 | 27,465,970  | rs109930822  | 6.77 X 10 <sup>-9</sup>                              | additive             | HDAC9 <sup>†</sup>               | 0.02         |
| 4 | 37,235,676  | rs133417267  | 5.77 X 10 <sup>-15</sup><br>5.77 X 10 <sup>-15</sup> | additive<br>dominant | SEMA3E <sup>†</sup>              | 0.03<br>0.03 |
| 4 | 54,918,207  | rs42421993   | 1.63 X 10 <sup>-13</sup><br>5.31 X 10 <sup>-15</sup> | additive<br>dominant | PPP1R3A                          | 0.03<br>0.03 |
| 4 | 93,277,289  | rs109721084  | 8.71 X 10 <sup>-10</sup>                             | dominant             | LEP                              | 0.02         |
| 4 | 109,038,482 | rs132930684  | 1.27 X 10 <sup>-8</sup><br>4.59 X 10 <sup>-11</sup>  | additive<br>dominant |                                  | 0.02<br>0.02 |
| 4 | 110,200,691 | rs110149102  | 4.48 X 10 <sup>-8</sup>                              | dominant             |                                  | 0.01         |
| 4 | 114,535,577 | rs43415527   | 2.78 X 10 <sup>-8</sup>                              | additive             | AGAP3 ASB10<br>GBX1 <sup>†</sup> | 0.02         |
| 4 | 117,606,629 | rs137620917  | 1.47 X 10 <sup>-20</sup><br>1.47 X 10 <sup>-20</sup> | additive<br>dominant | DPP6 <sup>†</sup>                | 0.04<br>0.04 |
| 4 | 118,148,549 | rs133872172  | 3.10 X 10 <sup>-8</sup>                              | dominant             | RBM33 <sup>†</sup>               | 0.02         |
| 4 | 119,201,399 | rs43420944   | 2.62 X 10 <sup>-8</sup>                              | dominant             |                                  | 0.02         |
| 5 | 17,173,888  | rs134628502  | 2.76 X 10 <sup>-10</sup>                             | dominant             |                                  | 0.02         |
| 5 | 17,207,930  | rs135145406  | 2.58 X 10 <sup>-8</sup>                              | dominant             | LOC782748 <sup>†</sup>           | 0.02         |
| 5 | 29,350,321  | rs110713926  | 1.63 X 10 <sup>-8</sup>                              | dominant             | DIP2B <sup>†</sup>               | 0.02         |
| 5 | 33,240,014  | rs135651218  | 6.68 X 10 <sup>-14</sup>                             | dominant             | PCED1B <sup>†</sup>              | 0.03         |
| 5 | 40,576,651  | rs43434026   | 8.48 X 10 <sup>-9</sup>                              | recessive            | MUC19 <sup>†</sup>               | 0.02         |
| 5 | 44,853,575  | rs134622788  | 8.77 X 10 <sup>-11</sup>                             | dominant             |                                  | 0.02         |
| 5 | 48,012,423  | rs135945780  | 8.42 X 10 <sup>-12</sup><br>8.42 X 10 <sup>-12</sup> | additive<br>dominant |                                  | 0.02<br>0.02 |
| 5 | 64,125,159  | rs110969021  | 2.60 X 10 <sup>-10</sup>                             | dominant             | ANKS1B <sup>†</sup>              | 0.02         |
| 5 | 72,903,919  | rs132740823  | 2.44 X 10 <sup>-8</sup><br>2.28 X 10 <sup>-8</sup>   | additive<br>dominant |                                  | 0.02<br>0.02 |
| 5 | 76,167,701  | rs109300805* | 2.11 X 10 <sup>-9</sup>                              | dominant             | ELFN2                            | 0.02         |

|   |             |              |                                                      |                      |                                                   |              |
|---|-------------|--------------|------------------------------------------------------|----------------------|---------------------------------------------------|--------------|
| 5 | 77,199,853  | rs43439753*  | 1.14 X 10 <sup>-11</sup><br>1.82 X 10 <sup>-16</sup> | additive<br>dominant |                                                   | 0.02<br>0.03 |
| 5 | 94,325,298  | rs135948685  | 1.25 X 10 <sup>-8</sup>                              | dominant             | DERA <sup>†</sup>                                 | 0.02         |
| 5 | 107,407,965 | rs133201447  | 5.13 X 10 <sup>-10</sup>                             | dominant             | FOXM1 ITFG2<br>LOC104972569<br>LOC782076<br>NRIP2 | 0.02         |
| 5 | 111,790,193 | rs109912186  | 2.03 X 10 <sup>-9</sup>                              | dominant             | GRAP2 <sup>†</sup>                                | 0.02         |
| 6 | 11,154,927  | rs43452214   | 4.28 X 10 <sup>-17</sup><br>6.63 X 10 <sup>-17</sup> | additive<br>dominant |                                                   | 0.03<br>0.03 |
| 6 | 11,301,952  | rs29019244   | 7.11 X 10 <sup>-10</sup>                             | dominant             |                                                   | 0.02         |
| 6 | 11,640,946  | rs108963104* | 2.42 X 10 <sup>-14</sup>                             | dominant             |                                                   | 0.03         |
| 6 | 13,154,909  | rs43450481   | 1.63 X 10 <sup>-8</sup>                              | dominant             | CAMK2D <sup>†</sup>                               | 0.02         |
| 6 | 42,265,935  | rs110203806  | 3.60 X 10 <sup>-8</sup>                              | dominant             | KCNIP4 <sup>†</sup>                               | 0.02         |
| 6 | 68,709,723  | rs135139162  | 2.65 X 10 <sup>-15</sup><br>1.89 X 10 <sup>-13</sup> | additive<br>dominant | SLAIN2 <sup>†</sup>                               | 0.03<br>0.03 |
| 6 | 73,503,493  | rs109467082  | 1.89 X 10 <sup>-15</sup><br>1.89 X 10 <sup>-15</sup> | additive<br>dominant | PAICS <sup>†</sup> PPAT<br>SRP72                  | 0.03<br>0.03 |
| 6 | 73,853,804  | rs43468439   | 1.17 X 10 <sup>-8</sup>                              | dominant             | REST <sup>†</sup>                                 | 0.02         |
| 6 | 74,910,779  | rs110648584  | 1.28 X 10 <sup>-8</sup><br>5.82 X 10 <sup>-9</sup>   | additive<br>dominant |                                                   | 0.02<br>0.02 |
| 6 | 78,372,811  | rs136660262  | 4.77 X 10 <sup>-9</sup>                              | dominant             | ADGRL3                                            | 0.02         |
| 6 | 81,047,108  | rs43125352*  | 8.28 X 10 <sup>-11</sup>                             | dominant             |                                                   | 0.02         |
| 6 | 85,034,144  | rs29004040   | 3.93 X 10 <sup>-8</sup><br>5.10 X 10 <sup>-10</sup>  | additive<br>dominant | STAP1 <sup>†</sup> UBA6                           | 0.01<br>0.02 |
| 6 | 92,587,809  | rs110063753  | 5.21 X 10 <sup>-9</sup><br>1.44 X 10 <sup>-10</sup>  | additive<br>dominant | CXCL9 SDAD1                                       | 0.02<br>0.02 |
| 6 | 93,263,835  | rs43476570   | 3.35 X 10 <sup>-11</sup>                             | dominant             | SHROOM3 <sup>†</sup>                              | 0.02         |
| 6 | 93,290,585  | rs43477811*  | 1.61 X 10 <sup>-8</sup>                              | dominant             | SHROOM3 <sup>†</sup>                              | 0.02         |
| 6 | 114,510,383 | rs109630077  | 1.08 X 10 <sup>-12</sup>                             | dominant             |                                                   | 0.03         |
| 7 | 6,118,322   | rs132731242  | 4.64 X 10 <sup>-8</sup><br>1.70 X 10 <sup>-10</sup>  | additive<br>dominant | F2RL3 SIN3B <sup>†</sup>                          | 0.01<br>0.02 |
| 7 | 12,213,252  | rs137569961  | 1.89 X 10 <sup>-8</sup>                              | dominant             | ADGRE3 <sup>†</sup>                               | 0.02         |
| 7 | 13,721,441  | rs41588240   | 2.24 X 10 <sup>-8</sup>                              | dominant             | GADD45GIP1 <sup>†</sup>                           | 0.02         |
| 7 | 15,034,214  | rs110743590  | 9.70 X 10 <sup>-9</sup><br>3.89 X 10 <sup>-10</sup>  | additive<br>dominant | LOC509510<br>LOC530825<br>LOC787383               | 0.02<br>0.02 |

|   |             |              |                                                      |                      |                                                 |              |
|---|-------------|--------------|------------------------------------------------------|----------------------|-------------------------------------------------|--------------|
| 7 | 19,341,834  | rs110943465  | 5.40 X 10 <sup>-9</sup><br>2.45 X 10 <sup>-8</sup>   | additive<br>dominant | ACER1 <sup>†</sup>                              | 0.02<br>0.02 |
| 7 | 28,375,798  | rs43734065   | 5.79 X 10 <sup>-11</sup><br>5.66 X 10 <sup>-11</sup> | additive<br>dominant | mar 3 <sup>‡</sup><br>LOC104969129 <sup>‡</sup> | 0.02<br>0.02 |
| 7 | 32,634,417  | rs132887259  | 3.70 X 10 <sup>-9</sup>                              | dominant             |                                                 | 0.02         |
| 7 | 54,413,989  | rs137316807  | 2.57 X 10 <sup>-9</sup>                              | dominant             |                                                 | 0.02         |
| 7 | 57,914,820  | rs42282884   | 1.04 X 10 <sup>-10</sup>                             | dominant             |                                                 | 0.02         |
| 7 | 58,055,640  | rs133170783  | 1.40 X 10 <sup>-8</sup>                              | dominant             |                                                 | 0.02         |
| 7 | 62,311,969  | rs134893796  | 1.27 X 10 <sup>-8</sup>                              | dominant             |                                                 | 0.02         |
| 7 | 64,472,010  | rs43519903   | 2.90 X 10 <sup>-8</sup>                              | dominant             | CCDC69                                          | 0.02         |
| 7 | 69,881,920  | rs135934765  | 4.36 X 10 <sup>-8</sup>                              | dominant             | SGCD <sup>‡</sup>                               | 0.01         |
| 7 | 75,775,268  | rs43530606   | 4.81 X 10 <sup>-8</sup>                              | dominant             | GABRA1                                          | 0.01         |
| 7 | 92,286,550  | rs133820271  | 5.35 X 10 <sup>-9</sup><br>8.35 X 10 <sup>-9</sup>   | additive<br>dominant | CETN3<br>LOC101904644                           | 0.02<br>0.02 |
| 7 | 93,415,439  | rs136096285  | 1.08 X 10 <sup>-8</sup>                              | dominant             | LOC104972872 <sup>‡</sup>                       | 0.02         |
| 7 | 108,044,827 | rs132834691  | 1.92 X 10 <sup>-15</sup><br>2.44 X 10 <sup>-17</sup> | additive<br>dominant |                                                 | 0.03<br>0.04 |
| 8 | 2,353,560   | rs110390603  | 1.26 X 10 <sup>-9</sup>                              | dominant             |                                                 | 0.02         |
| 8 | 12,163,981  | rs136342892  | 4.03 X 10 <sup>-9</sup>                              | dominant             |                                                 | 0.02         |
| 8 | 19,092,309  | rs136161638* | 1.21 X 10 <sup>-11</sup>                             | dominant             |                                                 | 0.02         |
| 8 | 22,202,557  | rs110186355  | 1.05 X 10 <sup>-8</sup>                              | dominant             |                                                 | 0.02         |
| 8 | 27,874,312  | rs136472729  | 3.46 X 10 <sup>-9</sup>                              | dominant             | BNC2 <sup>‡</sup>                               | 0.02         |
| 8 | 28,583,167  | rs133541436  | 2.39 X 10 <sup>-8</sup>                              | dominant             | CCDC171 <sup>‡</sup>                            | 0.02         |
| 8 | 36,504,354  | rs137050402  | 5.23 X 10 <sup>-9</sup>                              | dominant             | PTPRD <sup>‡</sup>                              | 0.02         |
| 8 | 37,065,088  | rs133042175  | 2.82 X 10 <sup>-8</sup>                              | dominant             |                                                 | 0.02         |
| 8 | 66,863,804  | rs136859732  | 2.08 X 10 <sup>-12</sup><br>2.08 X 10 <sup>-12</sup> | additive<br>dominant |                                                 | 0.02<br>0.02 |
| 8 | 67,682,317  | rs109114609  | 1.47 X 10 <sup>-9</sup><br>1.79 X 10 <sup>-10</sup>  | additive<br>dominant |                                                 | 0.02<br>0.02 |
| 8 | 72,863,847  | rs133191466  | 1.83 X 10 <sup>-9</sup>                              | dominant             |                                                 | 0.02         |
| 8 | 79,684,843  | rs132830182  | 3.79 X 10 <sup>-13</sup><br>3.79 X 10 <sup>-13</sup> | additive<br>dominant | NTRK2 <sup>‡</sup>                              | 0.03<br>0.03 |
| 8 | 97,074,254  | rs42788579   | 2.21 X 10 <sup>-9</sup>                              | dominant             | FKTN <sup>‡</sup>                               | 0.02         |
| 8 | 108,601,170 | rs43580717   | 2.42 X 10 <sup>-9</sup>                              | dominant             |                                                 | 0.02         |
| 9 | 5,919,500   | rs133149639* | 7.03 X 10 <sup>-11</sup>                             | dominant             |                                                 | 0.02         |
| 9 | 6,866,406   | rs136100571  | 1.50 X 10 <sup>-9</sup>                              | dominant             |                                                 | 0.02         |

|    |             |              |                                                      |                      |                           |              |
|----|-------------|--------------|------------------------------------------------------|----------------------|---------------------------|--------------|
| 9  | 9,963,570   | rs133966433  | 7.75 X 10 <sup>-13</sup><br>7.75 X 10 <sup>-13</sup> | additive<br>dominant | SDHAF4                    | 0.03<br>0.03 |
| 9  | 13,446,584  | rs136206718  | 4.32 X 10 <sup>-10</sup><br>1.55 X 10 <sup>-14</sup> | additive<br>dominant | CD109 <sup>†</sup>        | 0.02<br>0.03 |
| 9  | 35,028,074  | rs133188284  | 2.10 X 10 <sup>-16</sup><br>2.10 X 10 <sup>-16</sup> | additive<br>dominant | FRK NT5DC1                | 0.03<br>0.03 |
| 9  | 44,226,465  | rs133609612  | 6.18 X 10 <sup>-9</sup>                              | dominant             | LOC104972981 <sup>†</sup> | 0.02         |
| 9  | 44,384,391  | rs110770076  | 3.63 X 10 <sup>-9</sup>                              | dominant             | PRDM1                     | 0.02         |
| 9  | 45,148,825  | rs41609220   | 4.89 X 10 <sup>-33</sup><br>4.89 X 10 <sup>-33</sup> | additive<br>dominant |                           | 0.07<br>0.07 |
| 9  | 52,338,179  | rs110821231  | 2.96 X 10 <sup>-9</sup>                              | additive             | TRNAY-GUA                 | 0.02         |
| 9  | 52,348,239  | rs110294260  | 2.94 X 10 <sup>-12</sup><br>4.66 X 10 <sup>-10</sup> | additive<br>dominant | TRNAY-GUA                 | 0.02<br>0.02 |
| 9  | 52,350,552  | rs109542104  | 1.27 X 10 <sup>-8</sup>                              | additive             | TRNAY-GUA                 | 0.02         |
| 9  | 52,351,567  | rs109662298  | 1.47 X 10 <sup>-8</sup>                              | additive             | TRNAY-GUA                 | 0.02         |
| 9  | 52,352,425  | rs136330197  | 1.27 X 10 <sup>-8</sup>                              | additive             | TRNAY-GUA                 | 0.02         |
| 9  | 52,353,122  | rs133125776  | 1.61 X 10 <sup>-8</sup>                              | additive             | TRNAY-GUA                 | 0.02         |
| 9  | 52,354,187  | rs110831114  | 5.16 X 10 <sup>-12</sup><br>7.39 X 10 <sup>-10</sup> | additive<br>dominant | TRNAY-GUA                 | 0.02<br>0.02 |
| 9  | 52,360,536  | rs110029213  | 1.27 X 10 <sup>-8</sup>                              | additive             | TRNAY-GUA                 | 0.02         |
| 9  | 60,713,665  | rs43601819   | 3.76 X 10 <sup>-8</sup>                              | dominant             |                           | 0.02         |
| 9  | 65,306,072  | rs43602336   | 4.06 X 10 <sup>-9</sup><br>1.92 X 10 <sup>-8</sup>   | additive<br>dominant | LOC101907349 <sup>†</sup> | 0.02<br>0.02 |
| 9  | 72,452,687  | rs135308951  | 2.81 X 10 <sup>-10</sup><br>1.85 X 10 <sup>-9</sup>  | additive<br>dominant | EYA4 <sup>†</sup>         | 0.02<br>0.02 |
| 9  | 83,077,381  | rs41664363   | 1.72 X 10 <sup>-17</sup><br>1.72 X 10 <sup>-17</sup> | additive<br>dominant | UTRN <sup>†</sup>         | 0.04<br>0.04 |
| 9  | 90,375,296  | rs43608400   | 1.38 X 10 <sup>-8</sup><br>5.45 X 10 <sup>-13</sup>  | additive<br>dominant | SYNE1 <sup>†</sup>        | 0.02<br>0.03 |
| 9  | 91,451,664  | rs109821677* | 1.16 X 10 <sup>-9</sup>                              | dominant             |                           | 0.02         |
| 9  | 92,428,092  | rs133498424* | 8.25 X 10 <sup>-9</sup>                              | dominant             |                           | 0.02         |
| 9  | 98,344,328  | rs41588208   | 3.08 X 10 <sup>-8</sup>                              | dominant             | AGPAT4 <sup>†</sup>       | 0.02         |
| 9  | 100,434,182 | rs109080389  | 8.24 X 10 <sup>-14</sup><br>8.24 X 10 <sup>-14</sup> | additive<br>dominant | QKI <sup>†</sup>          | 0.03<br>0.03 |
| 9  | 101,345,498 | rs136913747  | 2.43 X 10 <sup>-11</sup>                             | dominant             |                           | 0.02         |
| 9  | 102,010,624 | rs136546097  | 2.53 X 10 <sup>-9</sup>                              | dominant             | PDE10A <sup>†</sup>       | 0.02         |
| 10 | 1,832,559   | rs134719504* | 1.15 X 10 <sup>-8</sup>                              | dominant             |                           | 0.02         |

|    |             |              |                                                      |                      |                                                                 |                |
|----|-------------|--------------|------------------------------------------------------|----------------------|-----------------------------------------------------------------|----------------|
| 10 | 3,261,109   | rs42963736   | 2.56 X 10 <sup>-10</sup>                             | dominant             | KCNN2 <sup>†</sup>                                              | 0.02           |
| 10 | 7,344,600   | rs134147845  | 1.57 X 10 <sup>-9</sup>                              | dominant             | SV2C <sup>†</sup>                                               | 0.02           |
| 10 | 15,063,352  | rs133889389  | 9.45 X 10 <sup>-10</sup>                             | additive             | FEM1B<br>LOC104973054 <sup>†</sup><br>TRNAC-GCA                 | 0.02           |
| 10 | 20,784,448  | rs134679432  | 1.72 X 10 <sup>-8</sup><br>1.92 X 10 <sup>-9</sup>   | additive<br>dominant | CHMP4A <sup>†</sup><br>GMPR2 IPO4<br>MDP1 NEDD8<br>TM9SF1 TSSK4 | 0.02<br>0.02   |
| 10 | 29,865,159  | rs110325782  | 9.85 X 10 <sup>-9</sup>                              | dominant             | FMN1 <sup>†</sup>                                               | 0.02           |
| 10 | 38,402,225  | rs134456240* | 4.33 X 10 <sup>-11</sup>                             | dominant             | UBR1 <sup>†</sup>                                               | 0.02           |
| 10 | 57,343,779  | rs137655014  | 1.23 X 10 <sup>-10</sup>                             | dominant             |                                                                 | 0.02           |
| 10 | 59,882,200  | rs110617366* | 7.74 X 10 <sup>-10</sup><br>5.12 X 10 <sup>-12</sup> | additive<br>dominant | TRPM7 <sup>†</sup>                                              | 0.02<br>0.02   |
| 10 | 63,194,703  | rs135485894  | 6.58 X 10 <sup>-9</sup>                              | dominant             |                                                                 | 0.02           |
| 10 | 63,217,046  | rs133388647  | 2.90 X 10 <sup>-12</sup><br>6.98 X 10 <sup>-20</sup> | additive<br>dominant |                                                                 | 0.02<br>0.04   |
| 10 | 77,116,010  | rs133464670  | 8.68 X 10 <sup>-11</sup>                             | dominant             | LOC104973208                                                    | 0.02           |
| 10 | 92,088,852  | rs137187232  | 1.01 X 10 <sup>-15</sup><br>2.89 X 10 <sup>-15</sup> | additive<br>dominant |                                                                 | 0.015<br>0.015 |
| 10 | 93,250,721  | rs109703777  | 3.70 X 10 <sup>-8</sup>                              | dominant             | CEP128 <sup>†</sup>                                             | 0.02           |
| 10 | 104,219,388 | rs41653547   | 7.63 X 10 <sup>-10</sup>                             | dominant             | C10H15orf43<br>LOC104973278<br>TRIM69                           | 0.02           |
| 11 | 2,125,437   | rs133812771  | 6.00 X 10 <sup>-9</sup>                              | dominant             | FAHD2A <sup>†</sup>                                             | 0.02           |
| 11 | 11,691,665  | rs134158654  | 1.60 X 10 <sup>-8</sup>                              | dominant             | EXOC6B <sup>†</sup>                                             | 0.02           |
| 11 | 21,211,676  | rs43669974   | 1.24 X 10 <sup>-11</sup>                             | dominant             | DHX57 <sup>†</sup>                                              | 0.02           |
| 11 | 30,340,497  | rs133968736  | 2.24 X 10 <sup>-8</sup>                              | dominant             |                                                                 | 0.02           |
| 11 | 35,881,102  | rs109807092  | 6.37 X 10 <sup>-9</sup>                              | dominant             |                                                                 | 0.02           |
| 11 | 40,920,900  | rs134495076  | 4.12 X 10 <sup>-9</sup>                              | dominant             |                                                                 | 0.02           |
| 11 | 50,339,491  | rs110204195* | 1.36 X 10 <sup>-8</sup>                              | dominant             |                                                                 | 0.02           |
| 11 | 51,483,571  | rs109310019  | 7.43 X 10 <sup>-11</sup><br>1.32 X 10 <sup>-9</sup>  | additive<br>dominant |                                                                 | 0.02<br>0.02   |
| 11 | 58,149,253  | rs136444067  | 4.49 X 10 <sup>-8</sup>                              | dominant             |                                                                 | 0.01           |
| 11 | 64,957,407  | rs137130860  | 1.20 X 10 <sup>-16</sup><br>1.20 X 10 <sup>-16</sup> | additive<br>dominant |                                                                 | 0.03<br>0.03   |
| 11 | 76,549,622  | rs110937755  | 3.08 X 10 <sup>-9</sup>                              | dominant             | LOC107132946 <sup>†</sup>                                       | 0.02           |

|    |             |              |                                                      |                      |                                    |              |
|----|-------------|--------------|------------------------------------------------------|----------------------|------------------------------------|--------------|
| 11 | 81,885,400  | rs133374668  | 2.74 X 10 <sup>-9</sup><br>8.59 X 10 <sup>-11</sup>  | additive<br>dominant |                                    | 0.02<br>0.02 |
| 11 | 83,038,073  | rs137538390  | 3.88 X 10 <sup>-11</sup>                             | dominant             | NBAS <sup>†</sup>                  | 0.02         |
| 11 | 86,400,864  | rs110541854  | 1.11 X 10 <sup>-8</sup>                              | dominant             |                                    | 0.02         |
| 11 | 91,325,669  | rs133468684  | 3.98 X 10 <sup>-8</sup>                              | dominant             |                                    | 0.01         |
| 11 | 94,120,538  | rs134709354  | 7.59 X 10 <sup>-9</sup>                              | dominant             | RABGAP1 <sup>†</sup>               | 0.02         |
| 11 | 96,474,351  | rs110930462  | 2.04 X 10 <sup>-8</sup>                              | dominant             | MAPKAP1 <sup>†</sup>               | 0.02         |
| 11 | 101,115,391 | rs136026124  | 8.53 X 10 <sup>-9</sup>                              | dominant             | ABL1 <sup>†</sup>                  | 0.02         |
| 12 | 4,302,535   | rs135803901* | 4.36 X 10 <sup>-9</sup>                              | dominant             |                                    | 0.02         |
| 12 | 14,220,951  | rs42421894   | 1.92 X 10 <sup>-9</sup>                              | dominant             |                                    | 0.02         |
| 12 | 17,136,529  | rs136450224  | 1.22 X 10 <sup>-8</sup>                              | dominant             |                                    | 0.02         |
| 12 | 19,384,047  | rs133433961  | 2.37 X 10 <sup>-8</sup><br>6.01 X 10 <sup>-15</sup>  | additive<br>dominant | KPNA3 <sup>†</sup><br>LOC783060    | 0.02<br>0.03 |
| 12 | 21,798,093  | rs110859101  | 2.80 X 10 <sup>-8</sup>                              | dominant             | LOC516736<br>SLC25A15              | 0.02         |
| 12 | 22,621,092  | rs136870702  | 3.69 X 10 <sup>-8</sup>                              | dominant             |                                    | 0.02         |
| 12 | 36,866,277  | rs133031236  | 3.48 X 10 <sup>-8</sup>                              | additive             | LOC100295315<br>RNF17 <sup>†</sup> | 0.02         |
| 12 | 43,939,457  | rs133296292  | 6.90 X 10 <sup>-13</sup><br>6.90 X 10 <sup>-13</sup> | additive<br>dominant |                                    | 0.03<br>0.03 |
| 12 | 44,369,482  | rs136399659  | 4.20 X 10 <sup>-9</sup>                              | dominant             | KLHL1 <sup>†</sup>                 | 0.02         |
| 12 | 58,518,230  | rs110718934  | 2.68 X 10 <sup>-8</sup>                              | additive             |                                    | 0.02         |
| 12 | 63,506,888  | rs42401835*  | 1.31 X 10 <sup>-8</sup><br>1.31 X 10 <sup>-8</sup>   | additive<br>dominant |                                    | 0.02<br>0.02 |
| 12 | 82,705,374  | rs109399990  | 9.93 X 10 <sup>-9</sup>                              | dominant             | FGF14 <sup>†</sup>                 | 0.02         |
| 12 | 88,309,027  | rs135467227  | 1.33 X 10 <sup>-8</sup><br>8.61 X 10 <sup>-9</sup>   | additive<br>dominant | MYO16 <sup>†</sup>                 | 0.02<br>0.02 |
| 13 | 1,247,948   | rs43711088   | 2.51 X 10 <sup>-17</sup><br>2.51 X 10 <sup>-17</sup> | additive<br>dominant | PLCB1 <sup>†</sup>                 | 0.04<br>0.04 |
| 13 | 8,920,866   | rs41679483   | 8.63 X 10 <sup>-10</sup>                             | dominant             | MACROD2 <sup>†</sup>               | 0.02         |
| 13 | 31,920,795  | rs109574513  | 3.79 X 10 <sup>-8</sup>                              | dominant             | TRDMT1 <sup>†</sup>                | 0.02         |
| 13 | 32,879,609  | rs109617842  | 1.12 X 10 <sup>-9</sup><br>1.27 X 10 <sup>-12</sup>  | additive<br>dominant | CACNB2 <sup>†</sup>                | 0.02<br>0.02 |
| 13 | 42,137,191  | rs41687892   | 2.56 X 10 <sup>-8</sup>                              | dominant             | TRNAS-GGA                          | 0.02         |
| 13 | 45,484,656  | rs42628484   | 2.19 X 10 <sup>-8</sup><br>1.34 X 10 <sup>-8</sup>   | additive<br>dominant | PFKP RNF17<br>PITRM1 <sup>†</sup>  | 0.02<br>0.02 |
| 14 | 12,011,754  | rs109257200  | 2.02 X 10 <sup>-8</sup>                              | recessive            |                                    | 0.02         |



|    |            |              |                                                      |                      |                       |              |
|----|------------|--------------|------------------------------------------------------|----------------------|-----------------------|--------------|
| 14 | 14,183,625 | rs135029808  | 1.12 X 10 <sup>-8</sup>                              | dominant             |                       | 0.02         |
| 14 | 20,508,616 | rs136484948  | 6.23 X 10 <sup>-9</sup>                              | dominant             |                       | 0.02         |
| 14 | 23,508,165 | rs41730395   | 1.18 X 10 <sup>-12</sup><br>1.18 X 10 <sup>-12</sup> | additive<br>dominant | ATP6V1H               | 0.02<br>0.02 |
| 14 | 25,425,357 | rs41722033   | 1.74 X 10 <sup>-11</sup>                             | dominant             | LOC101907667          | 0.02         |
| 14 | 25,633,578 | rs134826452  | 1.67 X 10 <sup>-21</sup><br>1.67 X 10 <sup>-21</sup> | additive<br>dominant |                       | 0.04<br>0.04 |
| 14 | 28,634,983 | rs135570111  | 9.25 X 10 <sup>-10</sup>                             | dominant             | CLVS1 <sup>†</sup>    | 0.02         |
| 14 | 41,600,948 | rs137036103* | 7.29 X 10 <sup>-9</sup>                              | dominant             |                       | 0.02         |
| 14 | 43,099,166 | rs42856301   | 3.77 X 10 <sup>-12</sup><br>3.77 X 10 <sup>-12</sup> | additive<br>dominant |                       | 0.02<br>0.02 |
| 14 | 43,953,144 | rs134492410  | 3.13 X 10 <sup>-9</sup>                              | dominant             | PKIA <sup>†</sup>     | 0.02         |
| 14 | 45,667,262 | rs136545426  | 3.09 X 10 <sup>-8</sup>                              | dominant             | LOC100138499          | 0.02         |
| 14 | 50,291,072 | rs41913814   | 2.64 X 10 <sup>-11</sup>                             | recessive            |                       | 0.02         |
| 14 | 60,686,566 | rs137829593  | 1.89 X 10 <sup>-15</sup><br>1.89 X 10 <sup>-15</sup> | additive<br>dominant |                       | 0.03<br>0.03 |
| 15 | 2,135,130  | rs136034166  | 2.24 X 10 <sup>-8</sup><br>2.49 X 10 <sup>-13</sup>  | additive<br>dominant | GRIA4 <sup>†</sup>    | 0.02<br>0.03 |
| 15 | 5,208,201  | rs41662040   | 8.93 X 10 <sup>-10</sup><br>1.63 X 10 <sup>-11</sup> | additive<br>dominant |                       | 0.02<br>0.02 |
| 15 | 31,040,001 | rs133729246  | 7.26 X 10 <sup>-9</sup><br>7.26 X 10 <sup>-9</sup>   | additive<br>dominant |                       | 0.02<br>0.02 |
| 15 | 54,722,255 | rs41770954   | 1.03 X 10 <sup>-12</sup>                             | dominant             | POLD3 <sup>†</sup>    | 0.03         |
| 15 | 55,552,388 | rs137402563  | 8.10 X 10 <sup>-14</sup><br>8.10 X 10 <sup>-14</sup> | additive<br>dominant | MAP6 <sup>†</sup>     | 0.03<br>0.03 |
| 15 | 61,669,862 | rs109416226  | 5.81 X 10 <sup>-10</sup><br>5.71 X 10 <sup>-10</sup> | additive<br>dominant |                       | 0.02<br>0.02 |
| 15 | 63,247,583 | rs135885524  | 3.15 X 10 <sup>-8</sup>                              | dominant             | ELP4 <sup>†</sup>     | 0.02         |
| 15 | 67,825,769 | rs133312284  | 2.86 X 10 <sup>-9</sup>                              | dominant             | RAG1 <sup>†</sup>     | 0.02         |
| 15 | 74,287,401 | rs133748740  | 3.82 X 10 <sup>-8</sup>                              | dominant             | API5                  | 0.02         |
| 15 | 84,195,776 | rs29021878   | 2.73 X 10 <sup>-10</sup><br>8.54 X 10 <sup>-11</sup> | additive<br>dominant | LOC101907407<br>PATL1 | 0.02<br>0.02 |
| 16 | 13,537,834 | rs137170596  | 1.82 X 10 <sup>-8</sup><br>9.94 X 10 <sup>-10</sup>  | additive<br>dominant | RGS21 <sup>†</sup>    | 0.02<br>0.02 |
| 16 | 15,473,841 | rs135148389  | 1.09 X 10 <sup>-8</sup><br>1.09 X 10 <sup>-8</sup>   | additive<br>dominant |                       | 0.02<br>0.02 |

|    |            |              |                                                      |                      |                                        |              |
|----|------------|--------------|------------------------------------------------------|----------------------|----------------------------------------|--------------|
| 16 | 15,481,171 | rs134711585  | 4.86 X 10 <sup>-11</sup><br>1.46 X 10 <sup>-12</sup> | additive<br>dominant |                                        | 0.02<br>0.02 |
| 16 | 20,500,260 | rs110701354  | 1.53 X 10 <sup>-16</sup><br>1.53 X 10 <sup>-16</sup> | additive<br>dominant | USH2A <sup>†</sup>                     | 0.03<br>0.03 |
| 16 | 35,683,918 | rs134810606  | 1.83 X 10 <sup>-8</sup>                              | dominant             | BECN2<br>LOC104974409<br>LOC104974410  | 0.02         |
| 16 | 40,004,888 | rs41804723   | 7.62 X 10 <sup>-9</sup><br>2.45 X 10 <sup>-10</sup>  | additive<br>dominant | VAMP4 <sup>†</sup>                     | 0.02<br>0.02 |
| 16 | 60,351,587 | rs109008645  | 9.99 X 10 <sup>-11</sup>                             | dominant             | LOC104974482 <sup>†</sup><br>TRNAG-CCC | 0.02         |
| 16 | 65,396,450 | rs133026423  | 1.85 X 10 <sup>-9</sup>                              | dominant             | DHX9 <sup>†</sup>                      | 0.02         |
| 16 | 67,766,937 | rs42465725   | 4.70 X 10 <sup>-12</sup>                             | dominant             | IVNS1ABP <sup>†</sup>                  | 0.02         |
| 16 | 69,808,920 | rs42378772   | 1.64 X 10 <sup>-9</sup><br>2.28 X 10 <sup>-11</sup>  | additive<br>dominant |                                        | 0.02<br>0.02 |
| 17 | 4,548,256  | rs110253313  | 5.01 X 10 <sup>-9</sup><br>1.63 X 10 <sup>-10</sup>  | additive<br>dominant |                                        | 0.02<br>0.02 |
| 17 | 7,238,905  | rs42503264   | 5.47 X 10 <sup>-10</sup><br>1.64 X 10 <sup>-13</sup> | additive<br>dominant | LRBA <sup>†</sup><br>MAB21L2           | 0.02<br>0.03 |
| 17 | 14,147,211 | rs135563413* | 4.10 X 10 <sup>-8</sup><br>2.01 X 10 <sup>-12</sup>  | additive<br>dominant | TRNAG-UCC                              | 0.01<br>0.02 |
| 17 | 40,345,468 | rs110378748  | 2.09 X 10 <sup>-11</sup><br>7.20 X 10 <sup>-15</sup> | additive<br>dominant |                                        | 0.02<br>0.03 |
| 17 | 41,089,654 | rs110704136  | 9.09 X 10 <sup>-9</sup><br>1.46 X 10 <sup>-9</sup>   | additive<br>dominant | FNIP2 <sup>†</sup>                     | 0.02<br>0.02 |
| 17 | 47,203,601 | rs41844776   | 3.63 X 10 <sup>-9</sup>                              | dominant             | ADGRD1<br>TRNAW-CCA                    | 0.02         |
| 17 | 54,321,728 | rs136973422  | 4.37 X 10 <sup>-8</sup>                              | dominant             | DDX55 <sup>†</sup>                     | 0.01         |
| 17 | 55,237,847 | rs136539859  | 3.56 X 10 <sup>-10</sup><br>3.56 X 10 <sup>-10</sup> | additive<br>dominant | CLIP1                                  | 0.02<br>0.02 |
| 17 | 57,905,713 | rs41846781   | 2.90 X 10 <sup>-11</sup><br>6.67 X 10 <sup>-15</sup> | additive<br>dominant | CIT <sup>†</sup><br>LOC104974648       | 0.02<br>0.03 |
| 17 | 57,934,917 | rs137751476  | 1.05 X 10 <sup>-8</sup>                              | dominant             | CIT <sup>†</sup>                       | 0.02         |
| 17 | 62,614,798 | rs110449993  | 3.17 X 10 <sup>-10</sup><br>3.17 X 10 <sup>-10</sup> | additive<br>dominant |                                        | 0.02<br>0.02 |
| 17 | 64,006,908 | rs134002184  | 2.43 X 10 <sup>-8</sup>                              | dominant             | PTPN11                                 | 0.02         |
| 18 | 5,461,878  | rs109191862  | 1.71 X 10 <sup>-8</sup>                              | dominant             | WWOX <sup>†</sup>                      | 0.02         |

|    |            |              |                                                      |                      |                                              |              |
|----|------------|--------------|------------------------------------------------------|----------------------|----------------------------------------------|--------------|
| 18 | 21,080,949 | rs132676005  | 3.15 X 10 <sup>-9</sup>                              | dominant             | TOX3 <sup>†</sup>                            | 0.02         |
| 18 | 21,805,397 | rs135055053* | 4.08 X 10 <sup>-9</sup>                              | additive             | CHD9 <sup>†</sup>                            | 0.02         |
| 18 | 21,929,721 | rs41872094   | 4.18 X 10 <sup>-9</sup><br>1.27 X 10 <sup>-11</sup>  | additive<br>dominant | AKTIP <sup>†</sup> RBL2                      | 0.02<br>0.02 |
| 18 | 55,406,165 | rs41888920   | 1.34 X 10 <sup>-10</sup><br>1.99 X 10 <sup>-9</sup>  | additive<br>dominant | BOSTAUV1R403<br>BOSTAUV1R404<br>LOC100847353 | 0.02<br>0.02 |
| 18 | 65,112,331 | rs133139781* | 1.60 X 10 <sup>-11</sup>                             | dominant             | LOC790271 <sup>†</sup>                       | 0.02         |
| 19 | 8,114,894  | rs109147231  | 2.30 X 10 <sup>-8</sup><br>1.32 X 10 <sup>-10</sup>  | additive<br>dominant |                                              | 0.02<br>0.02 |
| 19 | 12,537,367 | rs133524472  | 2.68 X 10 <sup>-9</sup>                              | additive             |                                              | 0.023        |
| 19 | 24,125,771 | rs137270020  | 4.16 X 10 <sup>-18</sup><br>4.16 X 10 <sup>-18</sup> | additive<br>dominant | LOC100336161<br>PAFAH1B1 <sup>†</sup>        | 0.04<br>0.04 |
| 19 | 36,438,190 | rs109963616* | 1.15 X 10 <sup>-8</sup>                              | dominant             | SPAG9                                        | 0.02         |
| 19 | 47,475,942 | rs41917870   | 2.14 X 10 <sup>-9</sup>                              | recessive            | EFCAB3 <sup>†</sup>                          | 0.02         |
| 19 | 48,613,006 | rs41921835   | 4.54 X 10 <sup>-9</sup>                              | dominant             | MAP3K3 <sup>†</sup>                          | 0.02         |
| 19 | 56,555,839 | rs137804276  | 1.06 X 10 <sup>-8</sup>                              | dominant             | RECQL5 <sup>†</sup>                          | 0.02         |
| 19 | 58,347,709 | rs109193093  | 1.56 X 10 <sup>-8</sup><br>1.56 X 10 <sup>-8</sup>   | additive<br>dominant | SDK2 <sup>†</sup>                            | 0.02<br>0.02 |
| 20 | 11,320,893 | rs133688167  | 2.20 X 10 <sup>-8</sup><br>9.47 X 10 <sup>-11</sup>  | additive<br>dominant | PIK3R1                                       | 0.02<br>0.02 |
| 20 | 42,618,265 | rs137766956* | 8.11 X 10 <sup>-9</sup>                              | dominant             |                                              | 0.02         |
| 20 | 46,054,426 | rs41949865*  | 1.76 X 10 <sup>-8</sup>                              | dominant             |                                              | 0.02         |
| 20 | 56,531,652 | rs135191929  | 6.65 X 10 <sup>-10</sup>                             | dominant             | MYO10 <sup>†</sup>                           | 0.02         |
| 20 | 57,113,135 | rs41956232   | 7.87 X 10 <sup>-10</sup><br>3.34 X 10 <sup>-12</sup> | additive<br>dominant | 11-mar <sup>†</sup>                          | 0.02<br>0.02 |
| 20 | 57,773,680 | rs135111737  | 2.71 X 10 <sup>-8</sup>                              | dominant             | FBXL7 <sup>†</sup>                           | 0.02         |
| 20 | 60,649,127 | rs42536899   | 2.27 X 10 <sup>-8</sup>                              | dominant             |                                              | 0.02         |
| 20 | 66,434,683 | rs41960759   | 2.87 X 10 <sup>-9</sup>                              | dominant             |                                              | 0.02         |
| 20 | 67,303,443 | rs41977686   | 2.45 X 10 <sup>-9</sup><br>2.27 X 10 <sup>-10</sup>  | additive<br>dominant |                                              | 0.02<br>0.02 |
| 21 | 9,179,282  | rs135625205  | 9.58 X 10 <sup>-9</sup>                              | dominant             |                                              | 0.02         |
| 21 | 14,800,548 | rs41619364   | 1.38 X 10 <sup>-8</sup>                              | dominant             | LOC785523                                    | 0.02         |
| 21 | 19,191,643 | rs41968656*  | 7.95 X 10 <sup>-9</sup>                              | dominant             |                                              | 0.02         |
| 21 | 21,479,311 | rs133287618  | 3.19 X 10 <sup>-8</sup>                              | additive             | KIF7<br>TICRR                                | 0.02         |

|    |            |              |                                                      |                      |                                                        |              |
|----|------------|--------------|------------------------------------------------------|----------------------|--------------------------------------------------------|--------------|
| 21 | 22,547,601 | rs133488994  | 5.33 X 10 <sup>-9</sup>                              | dominant             | IQGAP1 <sup>†</sup>                                    | 0.02         |
| 21 | 40,692,579 | rs110658904  | 6.82 X 10 <sup>-9</sup>                              | dominant             | PRKD1 <sup>†</sup>                                     | 0.02         |
| 21 | 53,293,514 | rs133762978  | 6.89 X 10 <sup>-9</sup>                              | dominant             |                                                        | 0.02         |
| 21 | 67,397,173 | rs109800519  | 1.04 X 10 <sup>-9</sup><br>3.31 X 10 <sup>-12</sup>  | additive<br>dominant | MEG3                                                   | 0.02<br>0.02 |
| 22 | 6,613,617  | rs134241191  | 4.48 X 10 <sup>-8</sup>                              | dominant             | TRNAG-CCC                                              | 0.01         |
| 22 | 7,883,649  | rs134321851  | 1.42 X 10 <sup>-9</sup><br>4.20 X 10 <sup>-13</sup>  | additive<br>dominant | CLASP2 <sup>†</sup>                                    | 0.02<br>0.03 |
| 22 | 9,972,687  | rs42578220   | 1.74 X 10 <sup>-11</sup><br>1.33 X 10 <sup>-11</sup> | additive<br>dominant |                                                        | 0.02<br>0.02 |
| 22 | 28,846,011 | rs136708885  | 1.45 X 10 <sup>-9</sup><br>2.47 X 10 <sup>-13</sup>  | additive<br>dominant | GXYLT2 <sup>†</sup>                                    | 0.02<br>0.03 |
| 22 | 38,612,397 | rs109985339  | 2.28 X 10 <sup>-10</sup>                             | dominant             |                                                        | 0.02         |
| 22 | 38,679,433 | rs109836331  | 3.45 X 10 <sup>-8</sup>                              | dominant             | CADPS                                                  | 0.02         |
| 22 | 44,912,994 | rs42011047   | 4.81 X 10 <sup>-11</sup><br>6.11 X 10 <sup>-9</sup>  | additive<br>dominant | FAM208A <sup>†</sup>                                   | 0.02<br>0.02 |
| 22 | 48,223,561 | rs41624710   | 8.50 X 10 <sup>-10</sup>                             | dominant             | DCP1A <sup>†</sup>                                     | 0.02         |
| 23 | 23,965,902 | rs41634508   | 4.77 X 10 <sup>-21</sup><br>4.77 X 10 <sup>-21</sup> | additive<br>dominant | PKHD1 <sup>†</sup>                                     | 0.04<br>0.04 |
| 23 | 28,746,821 | rs134213841  | 1.56 X 10 <sup>-9</sup>                              | recessive            | LOC101906691<br>LOC107131735<br>MOG <sup>†</sup> ZFP57 | 0.02         |
| 23 | 34,332,434 | rs133368886  | 4.23 X 10 <sup>-19</sup><br>1.97 X 10 <sup>-17</sup> | additive<br>dominant | LOC780995                                              | 0.04<br>0.04 |
| 23 | 34,453,204 | rs110105721* | 3.60 X 10 <sup>-8</sup><br>1.34 X 10 <sup>-9</sup>   | additive<br>dominant | PRP8                                                   | 0.02<br>0.02 |
| 23 | 34,505,837 | rs133953512* | 4.25 X 10 <sup>-8</sup>                              | dominant             | PRP6                                                   | 0.01         |
| 23 | 40,664,436 | rs133879598  | 3.81 X 10 <sup>-9</sup>                              | dominant             | GMPR <sup>†</sup>                                      | 0.02         |
| 24 | 6,039,397  | rs43146766*  | 1.18 X 10 <sup>-8</sup><br>4.43 X 10 <sup>-10</sup>  | additive<br>dominant |                                                        | 0.02<br>0.02 |
| 24 | 15,172,605 | rs109757717  | 7.89 X 10 <sup>-9</sup>                              | dominant             |                                                        | 0.02         |
| 24 | 19,100,872 | rs110602508  | 2.37 X 10 <sup>-11</sup>                             | dominant             |                                                        | 0.02         |
| 24 | 23,442,843 | rs110264722  | 1.69 X 10 <sup>-9</sup>                              | dominant             | NOL4 <sup>†</sup>                                      | 0.02         |
| 24 | 36,648,988 | rs109498992  | 6.71 X 10 <sup>-21</sup><br>6.71 X 10 <sup>-21</sup> | additive<br>dominant |                                                        | 0.04<br>0.04 |
| 24 | 37,585,202 | rs136377593  | 3.20 X 10 <sup>-8</sup>                              | dominant             | LPIN2 <sup>†</sup>                                     | 0.02         |

|    |            |              |                                                      |                      |                                                      |              |
|----|------------|--------------|------------------------------------------------------|----------------------|------------------------------------------------------|--------------|
| 24 | 46,912,208 | rs109156282  | 9.22 X 10 <sup>-10</sup><br>6.90 X 10 <sup>-12</sup> | additive<br>dominant | ST8SIA5 <sup>†</sup>                                 | 0.02<br>0.02 |
| 24 | 49,798,018 | rs109472635  | 1.32 X 10 <sup>-10</sup>                             | dominant             |                                                      | 0.02         |
| 24 | 50,503,943 | rs110770205  | 1.38 X 10 <sup>-8</sup>                              | recessive            |                                                      | 0.02         |
| 24 | 61,573,806 | rs133176874  | 2.87 X 10 <sup>-11</sup>                             | dominant             | PHLPP1 <sup>†</sup>                                  | 0.02         |
| 24 | 62,451,691 | rs133737149  | 1.08 X 10 <sup>-11</sup>                             | dominant             | LOC511106<br>LOC519132<br>LOC786410                  | 0.02         |
| 25 | 13,523,513 | rs134250904* | 6.15 X 10 <sup>-11</sup><br>1.28 X 10 <sup>-12</sup> | additive<br>dominant | PARN <sup>†</sup>                                    | 0.02<br>0.02 |
| 25 | 34,478,989 | rs135016010  | 4.06 X 10 <sup>-10</sup>                             | dominant             | HIP1 <sup>†</sup>                                    | 0.02         |
| 25 | 37,064,123 | rs134623086  | 1.22 X 10 <sup>-8</sup>                              | dominant             | LOC101904303 <sup>†</sup>                            | 0.02         |
| 25 | 39,846,521 | rs109120989  | 6.45 X 10 <sup>-10</sup>                             | dominant             | FOKK1<br>LOC101907846<br>MIR2890                     | 0.02         |
| 25 | 40,432,330 | rs134578134  | 2.83 X 10 <sup>-8</sup><br>1.93 X 10 <sup>-8</sup>   | additive<br>dominant | SDK1 <sup>†</sup>                                    | 0.02<br>0.02 |
| 26 | 7,709,388  | rs133146678  | 3.29 X 10 <sup>-10</sup>                             | dominant             | PRKG1 <sup>†</sup>                                   | 0.02         |
| 26 | 13,829,714 | rs42293525   | 1.85 X 10 <sup>-8</sup><br>1.19 X 10 <sup>-8</sup>   | additive<br>dominant | 5-Mar                                                | 0.02<br>0.02 |
| 26 | 20,714,265 | rs42086190   | 3.41 X 10 <sup>-9</sup>                              | dominant             | DNMBP <sup>†</sup>                                   | 0.02         |
| 26 | 25,589,629 | rs110088444  | 5.16 X 10 <sup>-14</sup><br>2.34 X 10 <sup>-14</sup> | additive<br>dominant | SORCS3 <sup>†</sup>                                  | 0.03<br>0.03 |
| 26 | 31,743,621 | rs110951772  | 7.91 X 10 <sup>-12</sup><br>1.72 X 10 <sup>-12</sup> | additive<br>dominant | BBIP1 MIR4680<br>MIR6524<br>PDCD4 <sup>†</sup> SHOC2 | 0.02<br>0.02 |
| 26 | 33,257,060 | rs42095933*  | 2.81 X 10 <sup>-10</sup>                             | dominant             | VTI1A <sup>†</sup>                                   | 0.02         |
| 26 | 41,354,357 | rs136057362  | 4.36 X 10 <sup>-8</sup>                              | dominant             | LOC101907208 <sup>†</sup>                            | 0.01         |
| 27 | 7,688,299  | rs42439113   | 8.25 X 10 <sup>-10</sup>                             | dominant             | AGA<br>LOC101904157                                  | 0.02         |
| 27 | 18,991,970 | rs109928360  | 5.84 X 10 <sup>-10</sup><br>3.54 X 10 <sup>-10</sup> | additive<br>dominant | LOC107131905<br>MTMR7 <sup>†</sup><br>TRNAE-UUC      | 0.02<br>0.02 |
| 27 | 21,083,026 | rs110750240  | 7.00 X 10 <sup>-11</sup>                             | dominant             |                                                      | 0.02         |
| 27 | 21,375,791 | rs132728892  | 1.84 X 10 <sup>-35</sup><br>1.84 X 10 <sup>-35</sup> | additive<br>dominant |                                                      | 0.07<br>0.07 |
| 28 | 6,330,810  | rs135488223  | 4.19 X 10 <sup>-11</sup>                             | dominant             |                                                      | 0.02         |

|    |             |              |                                                      |                       |                                                |              |
|----|-------------|--------------|------------------------------------------------------|-----------------------|------------------------------------------------|--------------|
| 28 | 22,005,009  | rs110596728* | 4.56 X 10 <sup>-10</sup>                             | dominant              |                                                | 0.02         |
| 28 | 26,832,602  | rs133727040  | 4.80 X 10 <sup>-11</sup><br>8.41 X 10 <sup>-13</sup> | additive<br>recessive |                                                | 0.02<br>0.03 |
| 28 | 27,785,987  | rs109367560  | 1.31 X 10 <sup>-9</sup>                              | dominant              | CDH23 <sup>†</sup>                             | 0.02         |
| 28 | 29,116,183  | rs136830696  | 4.74 X 10 <sup>-8</sup>                              | dominant              | PLA2G12B <sup>†</sup>                          | 0.01         |
| 28 | 29,592,323  | rs136467650  | 6.87 X 10 <sup>-9</sup><br>6.87 X 10 <sup>-9</sup>   | additive<br>dominant  | ANXA7<br>MSS51 <sup>†</sup>                    | 0.02<br>0.02 |
| 28 | 30,040,605  | rs135182095  | 4.05 X 10 <sup>-8</sup>                              | dominant              | VCL                                            | 0.01         |
| 28 | 31,582,482  | rs109038837  | 4.64 X 10 <sup>-8</sup>                              | additive              |                                                | 0.01         |
| 28 | 34,346,919  | rs110585405  | 4.28 X 10 <sup>-11</sup>                             | dominant              |                                                | 0.02         |
| 29 | 25,819,074  | rs110160296  | 3.42 X 10 <sup>-9</sup><br>1.01 X 10 <sup>-10</sup>  | additive<br>dominant  |                                                | 0.02<br>0.02 |
| 29 | 27,820,784  | rs43170197*  | 1.32 X 10 <sup>-8</sup>                              | dominant              | LOC787694 <sup>†</sup>                         | 0.02         |
| 29 | 31,640,269  | rs42708672   | 3.96 X 10 <sup>-8</sup>                              | additive              |                                                | 0.01         |
| 29 | 44,722,284  | rs42188587   | 4.33 X 10 <sup>-9</sup><br>3.46 X 10 <sup>-10</sup>  | additive<br>dominant  | LOC104976284<br>SART1<br>TSGA10IP <sup>†</sup> | 0.02<br>0.02 |
| X  | 10,845,015  | rs110621747  | 2.78 X 10 <sup>-9</sup><br>3.46 X 10 <sup>-10</sup>  | additive<br>dominant  |                                                | 0.02<br>0.02 |
| X  | 21,807,318  | rs109220334  | 9.94 X 10 <sup>-9</sup>                              | dominant              |                                                | 0.02         |
| X  | 21,827,945  | rs110658504  | 2.72 X 10 <sup>-10</sup>                             | dominant              | MAGEA11                                        | 0.02         |
| X  | 36,569,364  | rs136840493* | 3.49 X 10 <sup>-8</sup>                              | additive              | KIR3DL1<br>LOC107131295 <sup>†</sup>           | 0.02         |
| X  | 36,574,505  | rs135593222* | 1.24 X 10 <sup>-9</sup><br>9.02 X 10 <sup>-11</sup>  | additive<br>dominant  | KIR3DL1 <sup>†</sup><br>LOC107131295           | 0.02<br>0.02 |
| X  | 45,175,649  | rs134819091  | 2.20 X 10 <sup>-16</sup><br>2.20 X 10 <sup>-16</sup> | additive<br>dominant  |                                                | 0.03<br>0.03 |
| X  | 62,588,913  | rs137706243  | 3.54 X 10 <sup>-9</sup>                              | dominant              |                                                | 0.02         |
| X  | 65,081,915  | rs133502506  | 7.50 X 10 <sup>-9</sup>                              | dominant              | LOC100294935                                   | 0.02         |
| X  | 86,160,589  | rs133939924  | 1.33 X 10 <sup>-12</sup><br>1.33 X 10 <sup>-12</sup> | additive<br>dominant  | FAM155B<br>LOC104970534                        | 0.02<br>0.02 |
| X  | 101,652,487 | rs135383970  | 2.57 X 10 <sup>-9</sup>                              | dominant              | ARHGEF9 <sup>†</sup>                           | 0.02         |
| X  | 128,845,516 | rs110577907  | 6.78 X 10 <sup>-9</sup><br>3.68 X 10 <sup>-10</sup>  | additive<br>dominant  |                                                | 0.02<br>0.02 |
| X  | 147,800,877 | rs136023557  | 2.56 X 10 <sup>-8</sup>                              | dominant              | NLGN4X <sup>†</sup>                            | 0.02         |

<sup>†</sup>Chromosome location of the locus

<sup>2</sup>SNP location as measured by numbered nucleotides in reference to the UMD 3.1 genome assembly (<http://bovinegenome.org/?q=node/61>)

<sup>3</sup>The most significant SNP in the locus associated with cow conception rate as identified by *rs* number which is a reference number assigned to markers submitted to the National Center for Biotechnology Information SNP database (<https://www.ncbi.nlm.nih.gov/projects/SNP/>)

<sup>4</sup>SNP located within previously identified copy number variations (CNVs) are denoted with an \*.

<sup>5</sup>Significance (*P*-value) of the most significant SNP associated with cow conception rate.

<sup>6</sup>Genome-wide association model.

<sup>7</sup>Positional candidate gene(s) located within +/- 19 kb from associated SNP(s)

<sup>†</sup> Genes with SNPs identified within their coding sequence

<sup>8</sup>Contribution of each SNP to the total variance

**Supplementary Table 2. Loci Associated with Number of Times Bred to Achieve Pregnancy**

| BTA <sup>1</sup> | UMD 3.1<br>Position (bp) <sup>2</sup> | SNP ID <sup>3,4</sup>           | Models <sup>5</sup>  | p-Values <sup>6</sup>                                | Positional<br>Candidate<br>Genes <sup>7</sup> | Proportion<br>of<br>variance<br>explained <sup>8</sup> |
|------------------|---------------------------------------|---------------------------------|----------------------|------------------------------------------------------|-----------------------------------------------|--------------------------------------------------------|
| 1                | 3,546,098                             | <i>rs136767715</i>              | additive<br>dominant | 1.52 X 10 <sup>-8</sup><br>7.89 X 10 <sup>-13</sup>  | <i>TIAM1</i> <sup>†</sup>                     | 0.02<br>0.02                                           |
| 1                | 7,862,063                             | <i>rs135020930</i>              | additive<br>dominant | 2.62 X 10 <sup>-13</sup><br>2.62 X 10 <sup>-13</sup> |                                               | 0.016<br>0.016                                         |
| 1                | 11,250,683                            | <i>rs110647268</i> <sup>*</sup> | additive<br>dominant | 5.88 X 10 <sup>-16</sup><br>5.88 X 10 <sup>-16</sup> |                                               | 0.018<br>0.022                                         |
| 1                | 11,812,309                            | <i>rs109447046</i>              | additive<br>dominant | 2.37 X 10 <sup>-9</sup><br>1.70 X 10 <sup>-13</sup>  |                                               | 0.027<br>0.019                                         |
| 1                | 13,923,360                            | <i>rs134204993</i> <sup>*</sup> | dominant             | 4.53 X 10 <sup>-8</sup>                              |                                               | 0.016                                                  |
| 1                | 26,755,718                            | <i>rs133334228</i>              | dominant             | 1.89 X 10 <sup>-8</sup>                              | <i>ROBO1</i> <sup>†</sup>                     | 0.018                                                  |
| 1                | 29,618,772                            | <i>rs43224096</i>               | additive<br>dominant | 4.21 X 10 <sup>-15</sup><br>4.60 X 10 <sup>-17</sup> |                                               | 0.017<br>0.029                                         |
| 1                | 32,700,496                            | <i>rs43226666</i> <sup>*</sup>  | additive<br>dominant | 3.60 X 10 <sup>-9</sup><br>2.50 X 10 <sup>-13</sup>  | <i>CADM2</i> <sup>†</sup>                     | 0.016<br>0.023                                         |
| 1                | 36,710,870                            | <i>rs136512158</i>              | dominant             | 2.06 X 10 <sup>-9</sup>                              | <i>EPHA3</i>                                  | 0.018                                                  |
| 1                | 36,925,522                            | <i>rs136668233</i> <sup>*</sup> | dominant             | 4.07 X 10 <sup>-11</sup>                             | <i>EPHA3</i> <sup>†</sup>                     | 0.018                                                  |
| 1                | 45,719,982                            | <i>rs43682172</i>               | additive<br>dominant | 2.87 X 10 <sup>-8</sup><br>1.14 X 10 <sup>-12</sup>  | <i>ABI3BP</i> <sup>†</sup>                    | 0.022<br>0.025                                         |
| 1                | 45,909,194                            | <i>rs110537421</i>              | dominant             | 3.94 X 10 <sup>-8</sup>                              |                                               | 0.018                                                  |
| 1                | 52,895,536                            | <i>rs109491771</i> <sup>*</sup> | dominant             | 2.09 X 10 <sup>-9</sup>                              |                                               | 0.016                                                  |
| 1                | 56,582,506                            | <i>rs110092138</i>              | dominant             | 2.53 X 10 <sup>-8</sup>                              |                                               | 0.022<br>0.017                                         |
| 1                | 62,056,267                            | <i>rs42760220</i>               | dominant             | 9.99 X 10 <sup>-12</sup>                             |                                               | 0.019                                                  |
| 1                | 62,158,499                            | <i>rs42675527</i>               | additive<br>dominant | 2.22 X 10 <sup>-13</sup><br>8.03 X 10 <sup>-19</sup> | <i>LOC538060</i>                              | 0.021<br>0.021                                         |
| 1                | 64,591,504                            | <i>rs43652271</i>               | additive<br>dominant | 2.76 X 10 <sup>-13</sup><br>1.87 X 10 <sup>-15</sup> | <i>UPK1B</i> <sup>†</sup>                     | 0.019<br>0.019                                         |
| 1                | 64,894,430                            | <i>rs42911131</i>               | additive<br>dominant | 4.02 X 10 <sup>-9</sup><br>1.31 X 10 <sup>-13</sup>  | <i>CD80</i> <sup>†</sup><br><i>TIMMDC1</i>    | 0.023<br>0.023                                         |
| 1                | 65,061,560                            | <i>rs43234278</i>               | dominant             | 1.40 X 10 <sup>-8</sup>                              | <i>MAATS1</i> <sup>†</sup>                    | 0.017                                                  |



|   |             |                     |                      |                                                      |                                                                              |                |
|---|-------------|---------------------|----------------------|------------------------------------------------------|------------------------------------------------------------------------------|----------------|
| 1 | 84,709,807  | <i>rs109101339*</i> | dominant             | 2.86 X 10 <sup>-8</sup>                              | <i>ATP11B</i><br><i>DCUN1D1</i>                                              | 0.023<br>0.02  |
| 1 | 89,279,321  | <i>rs109891698</i>  | dominant             | 1.49 X 10 <sup>-8</sup>                              |                                                                              | 0.022          |
| 1 | 94,300,486  | <i>rs41606324*</i>  | additive<br>dominant | 3.97 X 10 <sup>-25</sup><br>2.01 X 10 <sup>-25</sup> | <i>NLGN1</i> <sup>†</sup>                                                    | 0.017<br>0.017 |
| 1 | 94,998,936  | <i>rs135160436</i>  | additive<br>dominant | 3.73 X 10 <sup>-8</sup><br>5.42 X 10 <sup>-11</sup>  | <i>SPATA16</i> <sup>†</sup>                                                  | 0.019<br>0.027 |
| 1 | 99,584,226  | <i>rs110848318</i>  | additive<br>dominant | 1.41 X 10 <sup>-9</sup><br>3.04 X 10 <sup>-17</sup>  |                                                                              | 0.017<br>0.017 |
| 1 | 108,986,133 | <i>rs42282809</i>   | dominant             | 3.53 X 10 <sup>-9</sup>                              |                                                                              | 0.016          |
| 1 | 112,961,101 | <i>rs110435444</i>  | additive<br>dominant | 1.27 X 10 <sup>-11</sup><br>8.70 X 10 <sup>-16</sup> | <i>PLCH1</i> <sup>†</sup>                                                    | 0.02<br>0.02   |
| 1 | 117,359,373 | <i>rs134846486</i>  | additive<br>dominant | 8.31 X 10 <sup>-9</sup><br>3.75 X 10 <sup>-13</sup>  |                                                                              | 0.022<br>0.024 |
| 1 | 117,571,948 | <i>rs133089690</i>  | dominant             | 1.10 X 10 <sup>-9</sup>                              | <i>MED12L</i> <sup>†</sup>                                                   | 0.041          |
| 1 | 118,817,882 | <i>rs43260026</i>   | dominant             | 8.09 X 10 <sup>-10</sup>                             | <i>LOC1049710</i><br><i>06</i>                                               | 0.017          |
| 1 | 123,956,245 | <i>rs132851673</i>  | dominant             | 5.14 X 10 <sup>-11</sup>                             |                                                                              | 0.04           |
| 1 | 126,235,693 | <i>rs136458590*</i> | additive<br>dominant | 1.38 X 10 <sup>-10</sup><br>3.46 X 10 <sup>-14</sup> | <i>SLC9A9</i> <sup>†</sup>                                                   | 0.016<br>0.022 |
| 1 | 129,836,154 | <i>rs136894301</i>  | dominant             | 6.08 X 10 <sup>-9</sup>                              | <i>CLSTN2</i> <sup>†</sup>                                                   | 0.017          |
| 1 | 130,576,374 | <i>rs110960328</i>  | additive<br>dominant | 7.24 X 10 <sup>-10</sup><br>2.32 X 10 <sup>-13</sup> | <i>KPNA6</i> <sup>†</sup><br><i>LOC1049710</i><br><i>35<sup>†</sup> RBP1</i> | 0.027<br>0.027 |
| 1 | 139,950,787 | <i>rs43278206</i>   | dominant             | 2.36 X 10 <sup>-9</sup>                              | <i>MRPL3</i>                                                                 | 0.016          |
| 1 | 154,853,461 | <i>rs134813046</i>  | additive<br>dominant | 8.74 X 10 <sup>-9</sup><br>1.05 X 10 <sup>-11</sup>  |                                                                              | 0.017<br>0.017 |
| 1 | 157,576,622 | <i>rs136888926*</i> | dominant             | 1.08 X 10 <sup>-8</sup>                              |                                                                              | 0.017          |
| 1 | 158,010,340 | <i>rs43289085</i>   | additive<br>dominant | 1.21 X 10 <sup>-12</sup><br>2.18 X 10 <sup>-13</sup> |                                                                              | 0.017<br>0.024 |
| 2 | 6,611,760   | <i>rs109028820</i>  | dominant             | 2.28 X 10 <sup>-8</sup>                              | <i>ASNSD1</i> <sup>†</sup>                                                   | 0.016          |
| 2 | 10,440,119  | <i>rs110576003</i>  | dominant             | 5.26 X 10 <sup>-10</sup>                             |                                                                              | 0.024          |
| 2 | 11,744,112  | <i>rs133600796</i>  | additive<br>dominant | 1.69 X 10 <sup>-9</sup><br>3.93 X 10 <sup>-10</sup>  | <i>ZNF804A</i> <sup>†</sup>                                                  | 0.021 0.033    |

|   |             |                     |                      |                                                      |                                      |                |
|---|-------------|---------------------|----------------------|------------------------------------------------------|--------------------------------------|----------------|
| 2 | 15,775,602  | <i>rs136049910</i>  | additive             | 1.98 X 10 <sup>-9</sup>                              | <i>TRNASTOP-<br/>UCA<br/>UBE2E3</i>  | 0.016          |
| 2 | 26,960,403  | <i>rs137188435</i>  | dominant             | 3.85 X 10 <sup>-8</sup>                              | <i>LRP2<sup>†</sup></i>              | 0.018          |
| 2 | 32,783,586  | <i>rs135787342</i>  | dominant             | 2.77 X 10 <sup>-10</sup>                             | <i>FIGN<sup>†</sup></i>              | 0.021          |
| 2 | 36,425,765  | <i>rs136627254</i>  | additive<br>dominant | 1.24 X 10 <sup>-8</sup><br>1.09 X 10 <sup>-10</sup>  | <i>PLA2R1<sup>†</sup></i>            | 0.054<br>0.054 |
| 2 | 39,686,326  | <i>rs134790315</i>  | dominant             | 1.24 X 10 <sup>-9</sup>                              |                                      | 0.017          |
| 2 | 55,050,085  | <i>rs42416884</i>   | dominant             | 1.72 X 10 <sup>-8</sup>                              |                                      | 0.025          |
| 2 | 55,236,847  | <i>rs111005641</i>  | additive             | 4.50 X 10 <sup>-8</sup>                              |                                      | 0.023          |
| 2 | 58,258,750  | <i>rs42354740</i>   | additive             | 1.35 X 10 <sup>-8</sup>                              |                                      | 0.018          |
| 2 | 65,451,280  | <i>rs133761371</i>  | additive             | 1.02 X 10 <sup>-8</sup>                              |                                      | 0.02           |
| 2 | 65,493,191  | <i>rs109322207</i>  | dominant             | 3.14 X 10 <sup>-9</sup>                              |                                      | 0.016          |
| 2 | 73,212,371  | <i>rs137104904</i>  | dominant             | 2.70 X 10 <sup>-8</sup>                              |                                      | 0.03           |
| 2 | 79,240,905  | <i>rs109507969</i>  | dominant             | 1.77 X 10 <sup>-9</sup>                              | <i>GYPC</i>                          | 0.021          |
| 2 | 80,429,623  | <i>rs134254979</i>  | dominant             | 3.94 X 10 <sup>-14</sup>                             | <i>LOC1049712<br/>67<sup>†</sup></i> | 0.022          |
| 2 | 84,127,565  | <i>rs110922881*</i> | dominant             | 2.82 X 10 <sup>-8</sup>                              |                                      | 0.022          |
| 2 | 85,462,609  | <i>rs109342415</i>  | dominant             | 4.28 X 10 <sup>-10</sup>                             | <i>LOC531691<sup>†</sup></i>         | 0.018          |
| 2 | 85,872,885  | <i>rs134179168</i>  | additive<br>dominant | 6.17 X 10 <sup>-13</sup><br>7.72 X 10 <sup>-19</sup> | <i>PGAP1<sup>†</sup></i>             | 0.016<br>0.022 |
| 2 | 87,872,337  | <i>rs41616585*</i>  | additive<br>dominant | 2.47 X 10 <sup>-8</sup><br>1.37 X 10 <sup>-10</sup>  |                                      | 0.03<br>0.032  |
| 2 | 88,137,677  | <i>rs135769112*</i> | additive<br>dominant | 2.20 X 10 <sup>-15</sup><br>2.20 X 10 <sup>-15</sup> |                                      | 0.022<br>0.024 |
| 2 | 88,201,219  | <i>rs110322233</i>  | dominant             | 3.96 X 10 <sup>-8</sup>                              |                                      | 0.032          |
| 2 | 94,405,242  | <i>rs109065091</i>  | dominant             | 1.30 X 10 <sup>-11</sup>                             | <i>PARD3B</i>                        | 0.017          |
| 2 | 98,167,527  | <i>rs41641857</i>   | dominant             | 4.02 X 10 <sup>-9</sup>                              | <i>UNC80<sup>†</sup></i>             | 0.017          |
| 2 | 103,031,098 | <i>rs135057060</i>  | dominant             | 9.08 X 10 <sup>-9</sup>                              | <i>VWC2L<sup>†</sup></i>             | 0.017          |
| 2 | 126,326,843 | <i>rs132632350</i>  | additive<br>dominant | 1.58 X 10 <sup>-16</sup><br>4.89 X 10 <sup>-14</sup> | <i>AHDC1</i>                         | 0.018<br>0.016 |
| 2 | 134,379,046 | <i>rs109722054</i>  | dominant             | 2.93 X 10 <sup>-8</sup>                              | <i>ALDH4A1<sup>†</sup></i>           | 0.021          |
| 3 | 2,328,452   | <i>rs137454379</i>  | dominant             | 2.80 X 10 <sup>-8</sup>                              |                                      | 0.017          |
| 3 | 7,783,286   | <i>rs135239306</i>  | additive<br>dominant | 1.48 X 10 <sup>-10</sup><br>4.92 X 10 <sup>-8</sup>  | <i>ATF6<sup>†</sup></i>              | 0.018<br>0.024 |
| 3 | 12,500,599  | <i>rs133108396</i>  | additive<br>dominant | 1.58 X 10 <sup>-10</sup><br>2.14 X 10 <sup>-10</sup> | <i>LOC531264</i>                     | 0.016<br>0.022 |

|   |             |                    |                      |                                                      |                                                      |                |
|---|-------------|--------------------|----------------------|------------------------------------------------------|------------------------------------------------------|----------------|
| 3 | 13,676,438  | <i>rs135949924</i> | dominant             | 3.44 X 10 <sup>-8</sup>                              | TRNAS-<br>GGA                                        | 0.016<br>0.023 |
| 3 | 14,665,964  | <i>rs136725222</i> | dominant             | 3.00 X 10 <sup>-10</sup>                             | <i>SEMA4A</i> <sup>†</sup>                           | 0.019          |
| 3 | 32,269,604  | <i>rs43336503</i>  | dominant             | 6.43 X 10 <sup>-12</sup>                             | <i>CHI3L2</i> <sup>†</sup>                           | 0.025          |
| 3 | 35,996,083  | <i>rs111017447</i> | dominant             | 4.12 X 10 <sup>-11</sup>                             | <i>NTNG1</i> <sup>†</sup>                            | 0.016          |
| 3 | 38,557,710  | <i>rs109265034</i> | dominant             | 1.98 X 10 <sup>-10</sup>                             |                                                      | 0.018          |
| 3 | 39,163,108  | <i>rs134279953</i> | additive             | 2.82 X 10 <sup>-10</sup>                             |                                                      | 0.034          |
| 3 | 41,684,925  | <i>rs135507420</i> | recessive            | 5.47 X 10 <sup>-11</sup>                             |                                                      | 0.016          |
| 3 | 42,093,978  | <i>rs134200102</i> | dominant             | 1.89 X 10 <sup>-9</sup>                              |                                                      | 0.019          |
| 3 | 48,737,120  | <i>rs133995663</i> | additive             | 1.01 X 10 <sup>-8</sup>                              |                                                      | 0.016          |
| 3 | 49,686,970  | <i>rs136708725</i> | additive<br>dominant | 1.02 X 10 <sup>-9</sup><br>6.53 X 10 <sup>-13</sup>  | <i>ABCA4</i><br><i>LOC783590</i>                     | 0.02           |
| 3 | 50,041,196  | <i>rs137661970</i> | additive<br>dominant | 4.03 X 10 <sup>-9</sup><br>2.94 X 10 <sup>-9</sup>   | <i>BCAR3</i> <sup>†</sup><br><i>LOC1019051</i><br>85 | 0.017          |
| 3 | 50,121,744  | <i>rs135149460</i> | additive<br>dominant | 3.74 X 10 <sup>-10</sup><br>1.59 X 10 <sup>-9</sup>  | <i>FNBP1L</i> <sup>†</sup>                           | 0.023<br>0.027 |
| 3 | 56,967,816  | <i>rs137196969</i> | dominant             | 1.11 X 10 <sup>-8</sup>                              |                                                      | 0.016          |
| 3 | 60,726,800  | <i>rs43342616</i>  | dominant             | 4.99 X 10 <sup>-10</sup>                             |                                                      | 0.018          |
| 3 | 66,777,217  | <i>rs133073532</i> | additive<br>dominant | 7.68 X 10 <sup>-9</sup><br>4.44 X 10 <sup>-13</sup>  | <i>GIPC2</i><br><i>LOC1001401</i><br>03              | 0.018<br>0.024 |
| 3 | 67,152,286  | <i>rs41659269</i>  | recessive            | 1.95 X 10 <sup>-8</sup>                              | <i>FAM73A</i><br><i>USP33</i>                        | 0.02<br>0.026  |
| 3 | 74,585,417  | <i>rs42228228</i>  | dominant             | 4.40 X 10 <sup>-9</sup>                              | <i>PTGER3</i> <sup>†</sup>                           | 0.034          |
| 3 | 77,163,315  | <i>rs136533238</i> | additive<br>dominant | 3.61 X 10 <sup>-11</sup><br>1.68 X 10 <sup>-14</sup> | <i>LOC1019075</i><br>44 <i>RPE65</i> <sup>†</sup>    | 0.016          |
| 3 | 84,157,548  | <i>rs137498683</i> | dominant             | 1.69 X 10 <sup>-11</sup>                             | <i>INADL</i> <sup>†</sup>                            | 0.018          |
| 3 | 97,680,312  | <i>rs41585055</i>  | additive<br>dominant | 1.22 X 10 <sup>-8</sup><br>9.07 X 10 <sup>-13</sup>  | <i>AGBL4</i> <sup>†</sup>                            | 0.018<br>0.019 |
| 3 | 98,096,750  | <i>rs29024665</i>  | dominant             | 1.70 X 10 <sup>-8</sup>                              | <i>AGBL4</i><br><i>BEND5</i>                         | 0.018          |
| 3 | 98,855,342  | <i>rs43356386</i>  | dominant             | 2.37 X 10 <sup>-12</sup>                             | <i>LOC1019063</i><br>01<br><i>TRABD2B</i>            | 0.016          |
| 3 | 101,247,684 | <i>rs43361651</i>  | additive<br>dominant | 5.81 X 10 <sup>-9</sup><br>6.24 X 10 <sup>-11</sup>  | <i>LOC1071323</i><br>49 <i>TESK2</i> <sup>†</sup>    | 0.016<br>0.016 |

|   |             |                     |                      |                                                      |                                        |               |
|---|-------------|---------------------|----------------------|------------------------------------------------------|----------------------------------------|---------------|
| 3 | 115,692,498 | <i>rs109046293*</i> | dominant             | 5.97 X 10 <sup>-10</sup>                             |                                        | 0.02<br>0.02  |
| 3 | 116,328,811 | <i>rs133498551</i>  | additive<br>dominant | 1.14 X 10 <sup>-9</sup><br>1.11 X 10 <sup>-11</sup>  | <i>ASB18†</i>                          | 0.017         |
| 3 | 119,504,166 | <i>rs41615294</i>   | dominant             | 3.17 X 10 <sup>-9</sup>                              | <i>LOC100336476</i>                    | 0.022         |
| 4 | 5,954,962   | <i>rs137299312</i>  | additive<br>dominant | 2.15 X 10 <sup>-19</sup><br>2.15 X 10 <sup>-19</sup> | <i>VWC2†</i>                           | 0.016<br>0.03 |
| 4 | 6,150,669   | <i>rs136754108*</i> | additive             | 2.00 X 10 <sup>-8</sup>                              |                                        | 0.017         |
| 4 | 6,371,195   | <i>rs133733598</i>  | dominant             | 2.27 X 10 <sup>-11</sup>                             |                                        | 0.023         |
| 4 | 6,502,615   | <i>rs137736954</i>  | dominant             | 3.89 X 10 <sup>-8</sup>                              |                                        | 0.023         |
| 4 | 17,088,259  | <i>rs133291985</i>  | dominant             | 9.43 X 10 <sup>-11</sup>                             | <i>GLCCI1<br/>LOC107132381</i>         | 0.016         |
| 4 | 17,611,774  | <i>rs41659165</i>   | dominant             | 4.93 X 10 <sup>-11</sup>                             | <i>NXP1†</i>                           | 0.018         |
| 4 | 18,435,856  | <i>rs43376515</i>   | dominant             | 3.31 X 10 <sup>-8</sup>                              |                                        | 0.021 0.036   |
| 4 | 24,223,070  | <i>rs43385175</i>   | dominant             | 2.30 X 10 <sup>-9</sup>                              | <i>LOC100294909</i>                    | 0.027 0.028   |
| 4 | 24,761,362  | <i>rs137563859</i>  | dominant             | 2.15 X 10 <sup>-10</sup>                             | <i>ISPD†</i>                           | 0.019 0.022   |
| 4 | 25,579,450  | <i>rs42345007</i>   | dominant             | 2.42 X 10 <sup>-8</sup>                              | <i>LOC781774</i>                       | 0.023         |
| 4 | 29,794,883  | <i>rs43181427</i>   | dominant             | 4.15 X 10 <sup>-9</sup>                              |                                        | 0.017         |
| 4 | 34,132,924  | <i>rs41592806</i>   | additive<br>dominant | 3.18 X 10 <sup>-8</sup><br>2.93 X 10 <sup>-10</sup>  |                                        | 0.016         |
| 4 | 37,235,676  | <i>rs133417267</i>  | additive<br>dominant | 4.99 X 10 <sup>-15</sup><br>4.99 X 10 <sup>-15</sup> | <i>SEMA3E†</i>                         | 0.022         |
| 4 | 51,437,631  | <i>rs109335929</i>  | dominant             | 1.68 X 10 <sup>-8</sup>                              | <i>WNT2†</i>                           | 0.018         |
| 4 | 54,918,207  | <i>rs42421993</i>   | additive<br>dominant | 2.65 X 10 <sup>-12</sup><br>2.96 X 10 <sup>-13</sup> | <i>PPP1R3A</i>                         | 0.017         |
| 4 | 66,232,207  | <i>rs108957740</i>  | dominant             | 2.76 X 10 <sup>-9</sup>                              | <i>NOD1†<br/>GGCT</i>                  | 0.021         |
| 4 | 78,821,054  | <i>rs133821212</i>  | additive<br>dominant | 2.37 X 10 <sup>-8</sup><br>8.50 X 10 <sup>-11</sup>  | <i>C4H7orf25<br/>MRPL32†<br/>PSMA2</i> | 0.022         |
| 4 | 80,320,092  | <i>rs43407832</i>   | dominant             | 4.85 X 10 <sup>-9</sup>                              |                                        | 0.019         |
| 4 | 85,958,373  | <i>rs135340912</i>  | dominant             | 3.65 X 10 <sup>-8</sup>                              | <i>KCND2†</i>                          | 0.017         |

|   |             |                                 |                      |                                                  |                                                                    |             |
|---|-------------|---------------------------------|----------------------|--------------------------------------------------|--------------------------------------------------------------------|-------------|
| 4 | 93,277,289  | <i>rs109721084</i>              | additive<br>dominant | $6.58 \times 10^{-11}$<br>$3.42 \times 10^{-14}$ | <i>LEP</i>                                                         | 0.02        |
| 4 | 94,023,459  | <i>rs133540884</i>              | dominant             | $8.16 \times 10^{-9}$                            | <i>AHCYL2</i> <sup>‡</sup>                                         | 0.017 0.023 |
| 4 | 94,120,438  | <i>rs133223938</i>              | additive<br>dominant | $4.83 \times 10^{-8}$<br>$7.70 \times 10^{-12}$  | <i>AHCYL2</i> <sup>‡</sup><br><i>LOC783260</i>                     | 0.017 0.017 |
| 4 | 97,756,608  | <i>rs110356330</i>              | additive<br>dominant | $1.19 \times 10^{-8}$<br>$2.14 \times 10^{-8}$   | <i>LOC787799</i> <sup>‡</sup>                                      | 0.015 0.024 |
| 4 | 98,336,209  | <i>rs135524891</i>              | dominant             | $3.48 \times 10^{-8}$                            | <i>EXOC4</i> <sup>‡</sup>                                          | 0.017       |
| 4 | 100,040,158 | <i>rs133842860</i>              | dominant             | $9.65 \times 10^{-10}$                           | <i>CNOT4</i> <sup>‡</sup>                                          | 0.017       |
| 4 | 102,090,604 | <i>rs133499092</i>              | dominant             | $4.90 \times 10^{-8}$                            | <i>DGKI</i> <sup>‡</sup>                                           | 0.017 0.027 |
| 4 | 109,038,482 | <i>rs132930684</i>              | additive<br>dominant | $9.62 \times 10^{-10}$<br>$2.17 \times 10^{-11}$ |                                                                    | 0.025 0.025 |
| 4 | 110,200,691 | <i>rs110149102</i>              | dominant             | $2.72 \times 10^{-10}$                           |                                                                    | 0.019       |
| 4 | 111,213,416 | <i>rs136229180</i>              | dominant             | $4.97 \times 10^{-8}$                            | <i>CNTNAP2</i> <sup>‡</sup>                                        | 0.017 0.016 |
| 4 | 114,052,951 | <i>rs43686023</i> <sup>*</sup>  | dominant             | $3.15 \times 10^{-9}$                            | <i>GIMAP6</i><br><i>LOC768255</i>                                  | 0.016       |
| 4 | 116,534,717 | <i>rs133516143</i>              | additive<br>dominant | $1.87 \times 10^{-8}$<br>$2.97 \times 10^{-10}$  |                                                                    | 0.016       |
| 4 | 117,606,629 | <i>rs137620917</i>              | additive<br>dominant | $4.67 \times 10^{-59}$<br>$4.67 \times 10^{-59}$ | <i>DPP6</i> <sup>‡</sup>                                           | 0.055 0.055 |
| 4 | 118,148,549 | <i>rs133872172</i>              | additive<br>dominant | $2.74 \times 10^{-9}$<br>$5.09 \times 10^{-11}$  | <i>RBM33</i> <sup>‡</sup>                                          | 0.016       |
| 4 | 118,420,186 | <i>rs136974031</i>              | additive<br>dominant | $7.49 \times 10^{-12}$<br>$7.49 \times 10^{-12}$ |                                                                    | 0.018       |
| 4 | 119,201,399 | <i>rs43420944</i>               | dominant             | $8.21 \times 10^{-11}$                           |                                                                    | 0.016       |
| 5 | 6,290,970   | <i>rs132725080</i> <sup>*</sup> | dominant             | $3.88 \times 10^{-8}$                            | <i>CSRP2</i><br><i>LOC1049723</i><br>27<br><i>LOC1049723</i><br>29 | 0.016       |
| 5 | 13,208,260  | <i>rs135881737</i>              | recessive            | $4.62 \times 10^{-9}$                            | <i>LOC1049723</i><br>47 <sup>‡</sup>                               | 0.016       |
| 5 | 16,995,758  | <i>rs136714577</i>              | dominant             | $6.16 \times 10^{-10}$                           |                                                                    | 0.017 0.021 |
| 5 | 17,173,888  | <i>rs134628502</i>              | additive<br>dominant | $2.56 \times 10^{-9}$<br>$5.72 \times 10^{-15}$  |                                                                    | 0.036 0.036 |
| 5 | 29,350,321  | <i>rs110713926</i>              | additive<br>dominant | $6.69 \times 10^{-10}$<br>$5.25 \times 10^{-10}$ | <i>ATF1</i><br><i>DIP2B</i> <sup>‡</sup>                           | 0.016 0.016 |

|   |             |                                 |                      |                                                  |                                                                                             |             |
|---|-------------|---------------------------------|----------------------|--------------------------------------------------|---------------------------------------------------------------------------------------------|-------------|
| 5 | 33,240,014  | <i>rs135651218</i>              | additive<br>dominant | $8.49 \times 10^{-11}$<br>$1.56 \times 10^{-18}$ | <i>PCED1B</i> <sup>†</sup>                                                                  | 0.02        |
| 5 | 37,947,429  | <i>rs133375087</i>              | additive<br>dominant | $1.23 \times 10^{-10}$<br>$6.69 \times 10^{-13}$ |                                                                                             | 0.021       |
| 5 | 40,576,651  | <i>rs43434026</i>               | recessive            | $3.03 \times 10^{-10}$                           | <i>MUC19</i> <sup>†</sup>                                                                   | 0.016       |
| 5 | 44,853,575  | <i>rs134622788</i>              | dominant             | $3.60 \times 10^{-12}$                           |                                                                                             | 0.048 0.048 |
| 5 | 46,675,202  | <i>rs136875517</i>              | dominant             | $2.06 \times 10^{-8}$                            |                                                                                             | 0.019       |
| 5 | 46,946,293  | <i>rs134326497</i>              | dominant             | $3.96 \times 10^{-9}$                            | <i>LOC1003374</i><br>78 <sup>†</sup>                                                        | 0.021       |
| 5 | 47,230,538  | <i>rs133350338</i>              | dominant             | $1.06 \times 10^{-10}$                           | <i>LOC1003374</i><br>78 <sup>†</sup>                                                        | 0.019 0.019 |
| 5 | 48,012,423  | <i>rs135945780</i>              | additive<br>dominant | $2.15 \times 10^{-9}$<br>$2.15 \times 10^{-9}$   |                                                                                             | 0.019       |
| 5 | 51,059,426  | <i>rs29022233</i>               | dominant             | $3.98 \times 10^{-8}$                            | <i>PPM1H</i> <sup>†</sup>                                                                   | 0.016       |
| 5 | 69,086,128  | <i>rs135161024</i>              | dominant             | $3.51 \times 10^{-8}$                            | <i>APPL2</i> <sup>†</sup>                                                                   | 0.022       |
| 5 | 72,465,721  | <i>rs109476686</i>              | dominant             | $1.52 \times 10^{-8}$                            | <i>LARGE</i> <sup>†</sup>                                                                   | 0.027       |
| 5 | 72,903,919  | <i>rs132740823</i>              | additive<br>dominant | $9.72 \times 10^{-11}$<br>$1.10 \times 10^{-10}$ |                                                                                             | 0.018       |
| 5 | 76,167,701  | <i>rs109300805</i> <sup>*</sup> | additive<br>dominant | $1.94 \times 10^{-14}$<br>$6.24 \times 10^{-17}$ | <i>ELFN2</i>                                                                                | 0.017       |
| 5 | 76,599,679  | <i>rs43054854</i> <sup>*</sup>  | dominant             | $3.19 \times 10^{-8}$                            |                                                                                             | 0.018       |
| 5 | 77,199,853  | <i>rs43439753</i> <sup>*</sup>  | additive<br>dominant | $2.65 \times 10^{-12}$<br>$2.80 \times 10^{-18}$ |                                                                                             | 0.016       |
| 5 | 88,633,335  | <i>rs137120693</i>              | dominant             | $3.85 \times 10^{-8}$                            |                                                                                             | 0.021       |
| 5 | 94,325,298  | <i>rs135948685</i>              | additive<br>dominant | $9.47 \times 10^{-9}$<br>$6.51 \times 10^{-12}$  | <i>DERA</i> <sup>†</sup>                                                                    | 0.022       |
| 5 | 100,303,435 | <i>rs108959142</i>              | additive<br>dominant | $7.81 \times 10^{-11}$<br>$1.02 \times 10^{-10}$ | <i>CLEC1A</i><br><i>CLEC7A</i>                                                              | 0.023       |
| 5 | 107,407,965 | <i>rs133201447</i>              | additive<br>dominant | $2.54 \times 10^{-8}$<br>$2.15 \times 10^{-12}$  | <i>FOXM1</i><br><i>ITFG2</i><br><i>LOC1049725</i><br>69<br><i>LOC782076</i><br><i>NRIP2</i> | 0.018 0.027 |
| 5 | 111,790,193 | <i>rs109912186</i>              | dominant             | $2.73 \times 10^{-13}$                           | <i>GRAP2</i> <sup>†</sup>                                                                   | 0.028       |

|   |             |                     |                      |                                                      |                                                                        |               |
|---|-------------|---------------------|----------------------|------------------------------------------------------|------------------------------------------------------------------------|---------------|
| 5 | 119,989,587 | <i>rs133819714</i>  | additive<br>dominant | 2.05 X 10 <sup>-9</sup><br>4.59 X 10 <sup>-9</sup>   | ADM2<br>LOC1019030<br>87<br>LOC1049726<br>15 MIOX<br>SBF1 <sup>†</sup> | 0.017 0.027   |
| 5 | 120,478,584 | <i>rs109532733</i>  | dominant             | 8.66 X 10 <sup>-11</sup>                             |                                                                        | 0.02<br>0.028 |
| 6 | 11,154,927  | <i>rs43452214</i>   | additive<br>dominant | 6.85 X 10 <sup>-15</sup><br>9.34 X 10 <sup>-15</sup> |                                                                        | 0.019 0.021   |
| 6 | 11,301,952  | <i>rs29019244</i>   | dominant             | 6.16 X 10 <sup>-9</sup>                              |                                                                        | 0.018 0.022   |
| 6 | 11,640,946  | <i>rs108963104*</i> | dominant             | 1.59 X 10 <sup>-16</sup>                             |                                                                        | 0.016         |
| 6 | 13,154,909  | <i>rs43450481</i>   | dominant             | 3.73 X 10 <sup>-10</sup>                             | CAMK2D <sup>†</sup>                                                    | 0.019         |
| 6 | 18,311,190  | <i>rs42489971</i>   | dominant             | 8.45 X 10 <sup>-9</sup>                              | LOC1071325<br>49 <sup>†</sup>                                          | 0.016 0.019   |
| 6 | 28,624,189  | <i>rs133675848</i>  | dominant             | 6.73 X 10 <sup>-9</sup>                              | LOC782977                                                              | 0.017         |
| 6 | 32,399,521  | <i>rs110488959</i>  | dominant             | 1.00 X 10 <sup>-9</sup>                              | LOC536367 <sup>†</sup>                                                 | 0.027 0.028   |
| 6 | 42,265,935  | <i>rs110203806</i>  | dominant             | 3.83 X 10 <sup>-10</sup>                             | KCNIP4 <sup>†</sup>                                                    | 0.017         |
| 6 | 42,942,951  | <i>rs134604999</i>  | additive             | 3.45 X 10 <sup>-8</sup>                              | KCNIP4 <sup>†</sup>                                                    | 0.029 0.029   |
| 6 | 44,529,753  | <i>rs132958625</i>  | dominant             | 5.29 X 10 <sup>-11</sup>                             | LOC1049727<br>33 <sup>†</sup>                                          | 0.017         |
| 6 | 48,243,519  | <i>rs134948194</i>  | dominant             | 1.31 X 10 <sup>-8</sup>                              |                                                                        | 0.016         |
| 6 | 61,601,562  | <i>rs109303139</i>  | dominant             | 3.25 X 10 <sup>-8</sup>                              | APBB2 <sup>†</sup>                                                     | 0.016 0.022   |
| 6 | 68,709,723  | <i>rs135139162</i>  | additive<br>dominant | 2.92 X 10 <sup>-19</sup><br>3.76 X 10 <sup>-19</sup> | SLAIN2 <sup>†</sup>                                                    | 0.016         |
| 6 | 73,503,493  | <i>rs109467082</i>  | additive<br>dominant | 6.85 X 10 <sup>-19</sup><br>6.85 X 10 <sup>-19</sup> | PAICS <sup>†</sup><br>PPAT<br>SRP72                                    | 0.018         |
| 6 | 73,853,804  | <i>rs43468439</i>   | dominant             | 1.10 X 10 <sup>-11</sup>                             | REST <sup>†</sup>                                                      | 0.017         |
| 6 | 74,910,779  | <i>rs110648584</i>  | additive<br>dominant | 6.05 X 10 <sup>-9</sup><br>2.14 X 10 <sup>-9</sup>   |                                                                        | 0.016 0.031   |
| 6 | 78,372,811  | <i>rs136660262</i>  | additive<br>dominant | 2.75 X 10 <sup>-8</sup><br>3.96 X 10 <sup>-14</sup>  | ADGRL3                                                                 | 0.02<br>0.021 |
| 6 | 81,047,108  | <i>rs43125352*</i>  | dominant             | 1.11 X 10 <sup>-11</sup>                             |                                                                        | 0.022         |
| 6 | 85,034,144  | <i>rs29004040</i>   | additive<br>dominant | 2.58 X 10 <sup>-8</sup><br>1.59 X 10 <sup>-10</sup>  | STAP1 <sup>†</sup><br>UBA6                                             | 0.015 0.025   |
| 6 | 88,153,418  | <i>rs43473246</i>   | dominant             | 5.70 X 10 <sup>-9</sup>                              |                                                                        | 0.016 0.016   |

|   |             |                                 |                      |                                                      |                                                                                                          |               |
|---|-------------|---------------------------------|----------------------|------------------------------------------------------|----------------------------------------------------------------------------------------------------------|---------------|
| 6 | 92,423,076  | <i>rs42553812</i>               | dominant             | 3.20 X 10 <sup>-8</sup>                              |                                                                                                          | 0.024         |
| 6 | 92,587,809  | <i>rs110063753</i>              | additive<br>dominant | 1.71 X 10 <sup>-10</sup><br>1.43 X 10 <sup>-14</sup> | <i>CXCL9</i><br><i>SDAD1</i>                                                                             | 0.017         |
| 6 | 93,263,835  | <i>rs43476570</i>               | additive<br>dominant | 2.45 X 10 <sup>-9</sup><br>2.64 X 10 <sup>-13</sup>  | <i>SHROOM3</i> <sup>†</sup>                                                                              | 0.03<br>0.036 |
| 6 | 97,543,454  | <i>rs135934271</i>              | additive             | 5.12 X 10 <sup>-9</sup>                              |                                                                                                          | 0.022 0.022   |
| 6 | 102,407,680 | <i>rs134284115</i>              | dominant             | 1.80 X 10 <sup>-8</sup>                              | <i>ARHGAP24</i> <sup>†</sup>                                                                             | 0.016         |
| 6 | 107,302,731 | <i>rs42919834</i> <sup>*</sup>  | dominant             | 1.11 X 10 <sup>-8</sup>                              | <i>LOC1019021</i><br><i>06 NSG1</i><br><i>RGS12</i>                                                      | 0.015 0.024   |
| 6 | 107,617,673 | <i>rs137693158</i> <sup>*</sup> | additive<br>dominant | 2.15 X 10 <sup>-9</sup><br>4.98 X 10 <sup>-8</sup>   | <i>LOC1019084</i><br><i>03</i> <sup>†</sup>                                                              | 0.015         |
| 6 | 114,510,383 | <i>rs109630077</i>              | additive<br>dominant | 1.57 X 10 <sup>-10</sup><br>2.81 X 10 <sup>-15</sup> |                                                                                                          | 0.018         |
| 6 | 117,439,794 | <i>rs110817413</i>              | dominant             | 6.56 X 10 <sup>-12</sup>                             |                                                                                                          | 0.021<br>0.03 |
| 6 | 118,987,625 | <i>rs135802025</i>              | additive<br>dominant | 1.33 X 10 <sup>-8</sup><br>8.24 X 10 <sup>-14</sup>  | <i>AFAP1</i> <sup>†</sup>                                                                                | 0.018         |
| 7 | 6,118,322   | <i>rs132731242</i>              | additive<br>dominant | 3.48 X 10 <sup>-8</sup><br>2.55 X 10 <sup>-11</sup>  | <i>F2RL3</i><br><i>SIN3B</i> <sup>†</sup>                                                                | 0.017 0.027   |
| 7 | 12,213,252  | <i>rs137569961</i>              | additive<br>dominant | 3.66 X 10 <sup>-8</sup><br>3.19 X 10 <sup>-10</sup>  | <i>ADGRE3</i> <sup>†</sup><br><i>LOC1001387</i><br><i>23</i>                                             | 0.016 0.021   |
| 7 | 13,024,481  | <i>rs133465587</i>              | dominant             | 9.61 X 10 <sup>-10</sup>                             |                                                                                                          | 0.016         |
| 7 | 13,721,441  | <i>rs41588240</i>               | additive<br>dominant | 2.83 X 10 <sup>-10</sup><br>9.78 X 10 <sup>-17</sup> | <i>CALR</i><br><i>GADD45</i><br><i>GIP1</i> <sup>†</sup><br><i>RAD23A</i><br><i>TRNAG-</i><br><i>CCC</i> | 0.024         |
| 7 | 15,034,214  | <i>rs110743590</i>              | additive<br>dominant | 8.77 X 10 <sup>-10</sup><br>3.95 X 10 <sup>-11</sup> | <i>LOC509510</i><br><i>LOC530825</i><br><i>LOC787383</i>                                                 | 0.016         |
| 7 | 16,070,246  | <i>rs134710953</i>              | dominant             | 1.04 X 10 <sup>-9</sup>                              | <i>FDX1L</i> <sup>†</sup>                                                                                | 0.022         |
| 7 | 19,341,834  | <i>rs110943465</i>              | additive<br>dominant | 2.50 X 10 <sup>-10</sup><br>3.17 X 10 <sup>-9</sup>  | <i>ACER1</i> <sup>†</sup>                                                                                | 0.019         |
| 7 | 20,209,433  | <i>rs109079807</i>              | dominant             | 2.67 X 10 <sup>-10</sup>                             | <i>PTPRS</i> <sup>†</sup>                                                                                | 0.028 0.041   |



|   |             |                     |                      |                                                      |                                                            |               |
|---|-------------|---------------------|----------------------|------------------------------------------------------|------------------------------------------------------------|---------------|
| 7 | 28,375,798  | <i>rs43734065</i>   | additive<br>dominant | 5.04 X 10 <sup>-10</sup><br>4.84 X 10 <sup>-10</sup> | 43527 <sup>†</sup><br><i>LOC1049691</i><br>29 <sup>†</sup> | 0.016         |
| 7 | 32,634,417  | <i>rs132887259</i>  | dominant             | 1.04 X 10 <sup>-10</sup>                             |                                                            | 0.022         |
| 7 | 52,052,097  | <i>rs109062580*</i> | additive             | 1.55 X 10 <sup>-8</sup>                              | <i>SIL1</i> <sup>†</sup>                                   | 0.021         |
| 7 | 54,413,989  | <i>rs137316807</i>  | dominant             | 6.30 X 10 <sup>-11</sup>                             |                                                            | 0.019         |
| 7 | 57,914,820  | <i>rs42282884</i>   | dominant             | 4.64 X 10 <sup>-11</sup>                             |                                                            | 0.022         |
| 7 | 58,055,640  | <i>rs133170783</i>  | additive<br>dominant | 1.08 X 10 <sup>-8</sup><br>1.77 X 10 <sup>-11</sup>  |                                                            | 0.017         |
| 7 | 62,311,969  | <i>rs134893796</i>  | dominant             | 9.64 X 10 <sup>-9</sup>                              |                                                            | 0.016         |
| 7 | 62,587,443  | <i>rs134479919</i>  | dominant             | 3.26 X 10 <sup>-8</sup>                              | <i>ABLIM3</i> <sup>†</sup>                                 | 0.026         |
| 7 | 63,352,489  | <i>rs43518018</i>   | additive             | 1.20 X 10 <sup>-8</sup>                              | <i>HMGXB3</i> <sup>†</sup>                                 | 0.017         |
| 7 | 64,472,010  | <i>rs43519903</i>   | dominant             | 9.46 X 10 <sup>-10</sup>                             | <i>CCDC69</i>                                              | 0.017         |
| 7 | 66,177,154  | <i>rs134217351</i>  | dominant             | 9.02 X 10 <sup>-9</sup>                              |                                                            | 0.025 0.028   |
| 7 | 66,660,279  | <i>rs42810268</i>   | dominant             | 2.40 X 10 <sup>-8</sup>                              |                                                            | 0.019         |
| 7 | 67,341,433  | <i>rs109136546</i>  | dominant             | 5.01 X 10 <sup>-10</sup>                             | <i>MFAP3</i>                                               | 0.017         |
| 7 | 69,881,920  | <i>rs135934765</i>  | dominant             | 2.45 X 10 <sup>-11</sup>                             | <i>SGCD</i> <sup>†</sup>                                   | 0.016         |
| 7 | 75,618,692  | <i>rs43524262</i>   | dominant             | 2.96 X 10 <sup>-8</sup>                              |                                                            | 0.02          |
| 7 | 75,637,375  | <i>rs43524270</i>   | dominant             | 3.34 X 10 <sup>-9</sup>                              |                                                            | 0.026 0.032   |
| 7 | 75,775,268  | <i>rs43530606</i>   | dominant             | 1.02 X 10 <sup>-10</sup>                             | <i>GABRA1</i>                                              | 0.019         |
| 7 | 93,415,439  | <i>rs136096285</i>  | dominant             | 9.09 X 10 <sup>-10</sup>                             | <i>LOC1049728</i><br>72 <sup>†</sup>                       | 0.023<br>0.03 |
| 7 | 96,163,665  | <i>rs109171007</i>  | dominant             | 2.44 X 10 <sup>-8</sup>                              | <i>KIAA0825</i> <sup>†</sup>                               | 0.019         |
| 7 | 98,571,597  | <i>rs133343732</i>  | dominant             | 2.67 X 10 <sup>-9</sup>                              | <i>CAST</i><br><i>ERAP1</i><br><i>LOC1049689</i><br>92     | 0.017         |
| 7 | 98,828,347  | <i>rs137216406</i>  | dominant             | 1.44 X 10 <sup>-9</sup>                              | <i>LNPEP</i> <sup>†</sup>                                  | 0.019         |
| 7 | 103,930,228 | <i>rs133117241</i>  | dominant             | 7.54 X 10 <sup>-11</sup>                             | <i>SLCO6A1</i> <sup>†</sup>                                | 0.019 0.015   |
| 7 | 106,968,546 | <i>rs43531491</i>   | dominant             | 2.50 X 10 <sup>-8</sup>                              |                                                            | 0.02          |
| 8 | 1,285,069   | <i>rs136213429</i>  | dominant             | 4.54 X 10 <sup>-8</sup>                              | <i>NEK1</i> <sup>†</sup>                                   | 0.071 0.071   |
| 8 | 2,353,560   | <i>rs110390603</i>  | dominant             | 1.72 X 10 <sup>-8</sup>                              |                                                            | 0.021         |
| 8 | 12,163,981  | <i>rs136342892</i>  | additive<br>dominant | 6.35 X 10 <sup>-9</sup><br>4.75 X 10 <sup>-11</sup>  |                                                            | 0.018         |
| 8 | 19,092,309  | <i>rs136161638*</i> | additive<br>dominant | 6.23 X 10 <sup>-9</sup><br>5.91 X 10 <sup>-14</sup>  |                                                            | 0.018         |
| 8 | 22,202,557  | <i>rs110186355</i>  | dominant             | 4.21 X 10 <sup>-8</sup>                              |                                                            | 0.016         |

|   |             |                                 |                      |                                                      |                                                             |               |
|---|-------------|---------------------------------|----------------------|------------------------------------------------------|-------------------------------------------------------------|---------------|
| 8 | 27,874,312  | <i>rs136472729</i>              | dominant             | 2.91 X 10 <sup>-9</sup>                              | <i>BNC2</i> <sup>†</sup>                                    | 0.017         |
| 8 | 28,583,167  | <i>rs133541436</i>              | dominant             | 1.85 X 10 <sup>-8</sup>                              | <i>CCDC171</i> <sup>†</sup>                                 | 0.016         |
| 8 | 36,504,354  | <i>rs137050402</i>              | dominant             | 4.38 X 10 <sup>-11</sup>                             | <i>PTPRD</i> <sup>†</sup>                                   | 0.025         |
| 8 | 37,065,088  | <i>rs133042175</i>              | dominant             | 1.56 X 10 <sup>-10</sup>                             |                                                             | 0.016         |
| 8 | 38,204,495  | <i>rs134355106</i>              | dominant             | 3.05 X 10 <sup>-10</sup>                             | <i>KDM4C</i> <sup>†</sup>                                   | 0.022         |
| 8 | 45,624,366  | <i>rs109293388</i>              | dominant             | 1.59 X 10 <sup>-8</sup>                              | <i>TJP2</i> <sup>†</sup>                                    | 0.016<br>0.02 |
| 8 | 54,054,285  | <i>rs135532670</i>              | dominant             | 1.22 X 10 <sup>-8</sup>                              | <i>GNAQ</i> <sup>†</sup>                                    | 0.017         |
| 8 | 60,640,805  | <i>rs134066757</i>              | dominant             | 5.02 X 10 <sup>-9</sup>                              | <i>LOC1002993</i><br>72<br><i>LOC523083</i><br><i>OR2S2</i> | 0.028         |
| 8 | 66,863,804  | <i>rs136859732</i>              | additive<br>dominant | 4.56 X 10 <sup>-12</sup><br>4.56 X 10 <sup>-12</sup> |                                                             | 0.016         |
| 8 | 67,682,317  | <i>rs109114609</i>              | additive<br>dominant | 6.85 X 10 <sup>-11</sup><br>6.55 X 10 <sup>-12</sup> |                                                             | 0.018         |
| 8 | 71,877,783  | <i>rs134492186</i>              | dominant             | 1.25 X 10 <sup>-9</sup>                              | <i>STC1</i>                                                 | 0.023 0.036   |
| 8 | 72,863,847  | <i>rs133191466</i>              | dominant             | 5.78 X 10 <sup>-11</sup>                             |                                                             | 0.016<br>0.03 |
| 8 | 79,684,843  | <i>rs132830182</i>              | additive<br>dominant | 1.05 X 10 <sup>-10</sup><br>1.05 X 10 <sup>-10</sup> | <i>NTRK2</i> <sup>†</sup>                                   | 0.023         |
| 8 | 84,307,178  | <i>rs43137599</i>               | dominant             | 2.96 X 10 <sup>-8</sup>                              |                                                             | 0.016 0.017   |
| 8 | 97,074,254  | <i>rs42788579</i>               | dominant             | 4.36 X 10 <sup>-11</sup>                             | <i>FKTN</i> <sup>†</sup>                                    | 0.022<br>0.03 |
| 8 | 104,626,077 | <i>rs133232898</i>              | additive<br>dominant | 4.89 X 10 <sup>-10</sup><br>6.72 X 10 <sup>-10</sup> | <i>LOC1019070</i><br>33                                     | 0.018         |
| 8 | 108,601,170 | <i>rs43580717</i>               | dominant             | 3.57 X 10 <sup>-10</sup>                             |                                                             | 0.035 0.029   |
| 9 | 5,919,500   | <i>rs133149639</i> <sup>*</sup> | additive<br>dominant | 3.56 X 10 <sup>-8</sup><br>2.20 X 10 <sup>-10</sup>  |                                                             | 0.017         |
| 9 | 6,866,406   | <i>rs136100571</i>              | dominant             | 1.76 X 10 <sup>-11</sup>                             |                                                             | 0.025         |
| 9 | 8,680,967   | <i>rs109198379</i>              | dominant             | 4.72 X 10 <sup>-8</sup>                              | <i>LOC788115</i>                                            | 0.024 0.026   |
| 9 | 8,815,237   | <i>rs110478223</i>              | dominant             | 2.52 X 10 <sup>-10</sup>                             | <i>LMBRD1</i>                                               | 0.021 0.031   |
| 9 | 9,963,570   | <i>rs133966433</i>              | additive<br>dominant | 4.51 X 10 <sup>-17</sup><br>4.51 X 10 <sup>-17</sup> | <i>SDHAF4</i>                                               | 0.02<br>0.023 |
| 9 | 13,446,584  | <i>rs136206718</i>              | additive<br>dominant | 2.55 X 10 <sup>-12</sup><br>4.61 X 10 <sup>-19</sup> | <i>CD109</i> <sup>†</sup>                                   | 0.017         |
| 9 | 28,592,450  | <i>rs109636996</i>              | dominant             | 1.48 X 10 <sup>-9</sup>                              |                                                             | 0.019         |

|    |             |                     |                      |                                                      |                                            |               |
|----|-------------|---------------------|----------------------|------------------------------------------------------|--------------------------------------------|---------------|
| 9  | 32,002,498  | <i>rs110127058*</i> | recessive            | 4.07 X 10 <sup>-8</sup>                              |                                            | 0.018         |
| 9  | 35,028,074  | <i>rs133188284</i>  | additive<br>dominant | 6.94 X 10 <sup>-14</sup><br>6.94 X 10 <sup>-14</sup> | <i>FRK</i><br><i>NT5DC1</i>                | 0.017         |
| 9  | 44,226,465  | <i>rs133609612</i>  | dominant             | 1.08 X 10 <sup>-8</sup>                              | <i>LOC1049729</i><br><i>81<sup>†</sup></i> | 0.02<br>0.031 |
| 9  | 44,384,391  | <i>rs110770076</i>  | dominant             | 1.07 X 10 <sup>-11</sup>                             | <i>PRDM1</i>                               | 0.017 0.017   |
| 9  | 45,148,825  | <i>rs41609220</i>   | additive<br>dominant | 5.72 X 10 <sup>-38</sup><br>5.72 X 10 <sup>-38</sup> |                                            | 0.017 0.016   |
| 9  | 48,483,554  | <i>rs133444736</i>  | dominant             | 1.99 X 10 <sup>-9</sup>                              | <i>GRIK2<sup>†</sup></i>                   | 0.023         |
| 9  | 60,146,602  | <i>rs43597897</i>   | dominant             | 1.05 X 10 <sup>-8</sup>                              |                                            | 0.022         |
| 9  | 60,713,665  | <i>rs43601819</i>   | additive<br>dominant | 4.84 X 10 <sup>-8</sup><br>8.12 X 10 <sup>-12</sup>  |                                            | 0.021         |
| 9  | 65,306,072  | <i>rs43602336</i>   | additive<br>dominant | 1.42 X 10 <sup>-10</sup><br>1.33 X 10 <sup>-9</sup>  | <i>LOC1019073</i><br><i>49<sup>†</sup></i> | 0.02<br>0.026 |
| 9  | 72,452,687  | <i>rs135308951</i>  | additive<br>dominant | 8.51 X 10 <sup>-9</sup><br>3.61 X 10 <sup>-8</sup>   | <i>EYA4<sup>†</sup></i>                    | 0.024 0.024   |
| 9  | 83,077,381  | <i>rs41664363</i>   | additive<br>dominant | 2.31 X 10 <sup>-18</sup><br>2.31 X 10 <sup>-18</sup> | <i>UTRN<sup>†</sup></i>                    | 0.016         |
| 9  | 89,347,416  | <i>rs110318317</i>  | dominant             | 4.05 X 10 <sup>-8</sup>                              |                                            | 0.017         |
| 9  | 90,375,296  | <i>rs43608400</i>   | additive<br>dominant | 1.18 X 10 <sup>-8</sup><br>5.66 X 10 <sup>-14</sup>  | <i>SYNE1<sup>†</sup></i>                   | 0.016         |
| 9  | 91,451,664  | <i>rs109821677*</i> | dominant             | 2.51 X 10 <sup>-10</sup>                             |                                            | 0.02          |
| 9  | 92,428,092  | <i>rs133498424*</i> | additive<br>dominant | 3.97 X 10 <sup>-8</sup><br>4.61 X 10 <sup>-9</sup>   |                                            | 0.018         |
| 9  | 97,903,543  | <i>rs133825925</i>  | dominant             | 5.44 X 10 <sup>-9</sup>                              | <i>SLC22A3</i>                             | 0.016         |
| 9  | 98,344,328  | <i>rs41588208</i>   | additive<br>dominant | 1.70 X 10 <sup>-8</sup><br>4.71 X 10 <sup>-12</sup>  | <i>AGPAT4<sup>†</sup></i>                  | 0.021 0.025   |
| 9  | 99,208,923  | <i>rs110927414</i>  | dominant             | 4.92 X 10 <sup>-8</sup>                              | <i>PARK2<sup>†</sup></i>                   | 0.021<br>0.02 |
| 9  | 100,434,182 | <i>rs109080389</i>  | additive<br>dominant | 2.80 X 10 <sup>-13</sup><br>2.80 X 10 <sup>-13</sup> | <i>QKI<sup>†</sup></i>                     | 0.016         |
| 9  | 101,083,868 | <i>rs137284328</i>  | dominant             | 1.88 X 10 <sup>-9</sup>                              |                                            | 0.017         |
| 9  | 101,345,498 | <i>rs136913747</i>  | additive<br>dominant | 4.06 X 10 <sup>-11</sup><br>8.26 X 10 <sup>-16</sup> |                                            | 0.021         |
| 9  | 102,010,624 | <i>rs136546097</i>  | dominant             | 4.10 X 10 <sup>-12</sup>                             | <i>PDE10A<sup>†</sup></i>                  | 0.019         |
| 9  | 103,818,595 | <i>rs137728083</i>  | dominant             | 6.27 X 10 <sup>-9</sup>                              |                                            | 0.017         |
| 10 | 1,832,559   | <i>rs134719504*</i> | dominant             | 9.38 X 10 <sup>-10</sup>                             |                                            | 0.017         |

|    |            |                                 |                      |                                                  |                                                                                                                           |             |
|----|------------|---------------------------------|----------------------|--------------------------------------------------|---------------------------------------------------------------------------------------------------------------------------|-------------|
| 10 | 3,261,109  | <i>rs42963736</i>               | additive<br>dominant | $6.25 \times 10^{-10}$<br>$2.51 \times 10^{-13}$ | <i>KCNN2</i> <sup>†</sup>                                                                                                 | 0.028 0.028 |
| 10 | 7,193,076  | <i>rs110381341</i>              | dominant             | $4.54 \times 10^{-8}$                            |                                                                                                                           | 0.016       |
| 10 | 7,344,600  | <i>rs134147845</i>              | dominant             | $3.78 \times 10^{-12}$                           | <i>SV2C</i> <sup>†</sup>                                                                                                  | 0.016 0.032 |
| 10 | 15,063,352 | <i>rs133889389</i>              | additive<br>dominant | $4.41 \times 10^{-13}$<br>$9.06 \times 10^{-10}$ | <i>FEM1B</i><br><i>LOC1049730</i><br><i>54<sup>†</sup> TRNAC-</i><br><i>GCA</i>                                           | 0.017       |
| 10 | 20,331,045 | <i>rs133786459</i>              | dominant             | $2.78 \times 10^{-9}$                            | <i>CD276</i> <sup>†</sup>                                                                                                 | 0.016       |
| 10 | 20,784,448 | <i>rs134679432</i>              | additive<br>dominant | $1.32 \times 10^{-9}$<br>$7.83 \times 10^{-11}$  | <i>CHMP4A</i> <sup>†</sup><br><i>GMPR2</i><br><i>IPO4</i><br><i>MDP1</i><br><i>NEDD8</i><br><i>TM9SF1</i><br><i>TSSK4</i> | 0.023 0.023 |
| 10 | 29,865,159 | <i>rs110325782</i>              | dominant             | $1.53 \times 10^{-10}$                           | <i>FMN1</i> <sup>†</sup>                                                                                                  | 0.018 0.018 |
| 10 | 34,832,325 | <i>rs137554479</i>              | dominant             | $5.31 \times 10^{-11}$                           |                                                                                                                           | 0.017 0.021 |
| 10 | 38,402,225 | <i>rs134456240</i> <sup>*</sup> | additive<br>dominant | $1.25 \times 10^{-9}$<br>$8.34 \times 10^{-15}$  | <i>UBR1</i> <sup>†</sup>                                                                                                  | 0.023       |
| 10 | 57,343,779 | <i>rs137655014</i>              | dominant             | $7.20 \times 10^{-13}$                           |                                                                                                                           | 0.024       |
| 10 | 59,882,200 | <i>rs110617366</i> <sup>*</sup> | additive<br>dominant | $5.40 \times 10^{-12}$<br>$3.65 \times 10^{-15}$ | <i>TRPM7</i> <sup>†</sup>                                                                                                 | 0.017       |
| 10 | 63,194,703 | <i>rs135485894</i>              | additive<br>dominant | $1.69 \times 10^{-10}$<br>$4.37 \times 10^{-12}$ |                                                                                                                           | 0.017       |
| 10 | 63,217,046 | <i>rs133388647</i>              | additive<br>dominant | $3.12 \times 10^{-11}$<br>$1.36 \times 10^{-19}$ |                                                                                                                           | 0.019       |
| 10 | 63,689,249 | <i>rs133765760</i>              | dominant             | $5.75 \times 10^{-9}$                            |                                                                                                                           | 0.019       |
| 10 | 75,419,514 | <i>rs136140522</i>              | dominant             | $9.71 \times 10^{-9}$                            | <i>KCNH5</i> <sup>†</sup>                                                                                                 | 0.018 0.018 |
| 10 | 76,220,343 | <i>rs41656312</i>               | dominant             | $7.45 \times 10^{-9}$                            | <i>LOC1019043</i><br><i>56</i>                                                                                            | 0.023 0.042 |
| 10 | 77,116,010 | <i>rs133464670</i>              | additive<br>dominant | $6.76 \times 10^{-9}$<br>$6.87 \times 10^{-14}$  | <i>LOC1049732</i><br><i>08</i>                                                                                            | 0.024       |
| 10 | 82,364,565 | <i>rs132734439</i>              | dominant             | $1.86 \times 10^{-9}$                            | <i>SYNJ2BP</i> <sup>†</sup>                                                                                               | 0.016       |
| 10 | 84,291,187 | <i>rs135397847</i>              | additive             | $2.33 \times 10^{-8}$                            | <i>RGS6</i> <sup>†</sup><br><i>TRNAE-</i><br><i>UUC</i>                                                                   | 0.018       |

|    |             |                                 |                      |                                                      |                                                             |               |
|----|-------------|---------------------------------|----------------------|------------------------------------------------------|-------------------------------------------------------------|---------------|
| 10 | 92,088,852  | <i>rs137187232</i>              | additive<br>dominant | 4.50 X 10 <sup>-8</sup><br>1.61 X 10 <sup>-8</sup>   |                                                             | 0.016         |
| 10 | 93,250,721  | <i>rs109703777</i>              | dominant             | 7.11 X 10 <sup>-11</sup>                             | <i>CEP128</i> <sup>†</sup>                                  | 0.025         |
| 10 | 97,330,853  | <i>rs133139647</i>              | dominant             | 2.18 X 10 <sup>-8</sup>                              |                                                             | 0.022         |
| 10 | 104,219,388 | <i>rs41653547</i>               | additive<br>dominant | 2.67 X 10 <sup>-9</sup><br>3.27 X 10 <sup>-13</sup>  | <i>C10H15orf43</i><br><i>LOC1049732</i><br><i>78 TRIM69</i> | 0.024 0.024   |
| 11 | 2,125,437   | <i>rs133812771</i>              | dominant             | 7.87 X 10 <sup>-12</sup>                             | <i>FAHD2A</i> <sup>†</sup>                                  | 0.016         |
| 11 | 6,714,691   | <i>rs43653712</i> <sup>*</sup>  | dominant             | 1.69 X 10 <sup>-8</sup>                              | <i>IL1R2</i>                                                | 0.023         |
| 11 | 11,691,665  | <i>rs134158654</i>              | dominant             | 2.66 X 10 <sup>-8</sup>                              | <i>EXOC6B</i> <sup>†</sup>                                  | 0.025         |
| 11 | 17,366,963  | <i>rs41836414</i>               | additive<br>dominant | 6.51 X 10 <sup>-10</sup><br>1.14 X 10 <sup>-8</sup>  |                                                             | 0.021 0.015   |
| 11 | 17,721,099  | <i>rs134981474</i>              | dominant             | 9.51 X 10 <sup>-9</sup>                              |                                                             | 0.021         |
| 11 | 21,211,676  | <i>rs43669974</i>               | dominant             | 9.20 X 10 <sup>-12</sup>                             | <i>DHX57</i> <sup>†</sup>                                   | 0.019         |
| 11 | 30,340,497  | <i>rs133968736</i>              | dominant             | 9.33 X 10 <sup>-9</sup>                              |                                                             | 0.02<br>0.017 |
| 11 | 33,792,560  | <i>rs136691291</i> <sup>*</sup> | recessive            | 1.07 X 10 <sup>-8</sup>                              |                                                             | 0.015         |
| 11 | 35,881,102  | <i>rs109807092</i>              | additive<br>dominant | 2.34 X 10 <sup>-12</sup><br>1.24 X 10 <sup>-11</sup> |                                                             | 0.016         |
| 11 | 40,920,900  | <i>rs134495076</i>              | additive<br>dominant | 8.82 X 10 <sup>-10</sup><br>9.15 X 10 <sup>-13</sup> |                                                             | 0.018         |
| 11 | 48,862,934  | <i>rs135578400</i>              | additive<br>dominant | 7.86 X 10 <sup>-9</sup><br>1.01 X 10 <sup>-8</sup>   | <i>ST3GAL5</i> <sup>†</sup><br><i>TRNAE-</i><br><i>UUC</i>  | 0.02<br>0.027 |
| 11 | 50,428,456  | <i>rs43681043</i> <sup>*</sup>  | additive<br>dominant | 3.91 X 10 <sup>-10</sup><br>2.04 X 10 <sup>-10</sup> | <i>LOC1019033</i><br><i>67 SUCLG1</i> <sup>†</sup>          | 0.025         |
| 11 | 51,483,571  | <i>rs109310019</i>              | additive<br>dominant | 1.30 X 10 <sup>-10</sup><br>3.65 X 10 <sup>-10</sup> |                                                             | 0.017         |
| 11 | 52,289,973  | <i>rs136569977</i>              | dominant             | 3.28 X 10 <sup>-9</sup>                              |                                                             | 0.018         |
| 11 | 57,058,516  | <i>rs42234541</i>               | dominant             | 8.54 X 10 <sup>-11</sup>                             |                                                             | 0.016 0.019   |
| 11 | 58,149,253  | <i>rs136444067</i>              | dominant             | 1.29 X 10 <sup>-9</sup>                              |                                                             | 0.02<br>0.02  |
| 11 | 60,357,999  | <i>rs42706937</i>               | dominant             | 3.73 X 10 <sup>-8</sup>                              | <i>FAM161A</i> <sup>†</sup>                                 | 0.016 0.019   |
| 11 | 64,957,407  | <i>rs137130860</i>              | additive<br>dominant | 3.66 X 10 <sup>-17</sup><br>3.66 X 10 <sup>-17</sup> |                                                             | 0.018         |
| 11 | 71,299,883  | <i>rs110053143</i>              | dominant             | 1.67 X 10 <sup>-9</sup>                              |                                                             | 0.021         |

|    |             |                                 |                      |                                                      |                                                                                             |               |
|----|-------------|---------------------------------|----------------------|------------------------------------------------------|---------------------------------------------------------------------------------------------|---------------|
| 11 | 71,918,597  | <i>rs137231497</i>              | additive<br>dominant | 4.57 X 10 <sup>-8</sup><br>9.82 X 10 <sup>-9</sup>   | <i>MRPL33</i><br><i>RBKS</i> <sup>‡</sup>                                                   | 0.017         |
| 11 | 73,375,063  | <i>rs134964414</i>              | additive<br>dominant | 1.05 X 10 <sup>-9</sup><br>7.79 X 10 <sup>-10</sup>  | <i>LOC1049734</i><br><i>24<sup>†</sup> RAB10<sup>†</sup></i><br><i>TRNAC-</i><br><i>ACA</i> | 0.018         |
| 11 | 81,885,400  | <i>rs133374668</i>              | additive<br>dominant | 6.50 X 10 <sup>-11</sup><br>6.54 X 10 <sup>-12</sup> |                                                                                             | 0.017         |
| 11 | 83,038,073  | <i>rs137538390</i>              | additive<br>dominant | 1.21 X 10 <sup>-8</sup><br>1.07 X 10 <sup>-13</sup>  | <i>NBAS</i> <sup>‡</sup>                                                                    | 0.018         |
| 11 | 86,400,864  | <i>rs110541854</i>              | dominant             | 1.27 X 10 <sup>-10</sup>                             |                                                                                             | 0.022         |
| 11 | 89,501,669  | <i>rs135806178</i>              | dominant             | 2.05 X 10 <sup>-8</sup>                              |                                                                                             | 0.017 0.029   |
| 11 | 91,325,669  | <i>rs133468684</i>              | dominant             | 7.55 X 10 <sup>-9</sup>                              |                                                                                             | 0.027<br>0.04 |
| 11 | 94,120,538  | <i>rs134709354</i>              | dominant             | 1.43 X 10 <sup>-8</sup>                              | <i>RABGAP1</i> <sup>‡</sup>                                                                 | 0.024         |
| 11 | 96,067,855  | <i>rs136776805</i>              | additive<br>dominant | 2.14 X 10 <sup>-8</sup><br>3.35 X 10 <sup>-8</sup>   | <i>PPP6C</i> <sup>‡</sup>                                                                   | 0.016 0.016   |
| 11 | 96,474,351  | <i>rs110930462</i>              | dominant             | 8.45 X 10 <sup>-9</sup>                              | <i>MAPKAP1</i> <sup>‡</sup>                                                                 | 0.019         |
| 11 | 101,115,391 | <i>rs136026124</i>              | dominant             | 6.99 X 10 <sup>-9</sup>                              | <i>ABL1</i> <sup>‡</sup>                                                                    | 0.019 0.023   |
| 12 | 4,302,535   | <i>rs135803901</i> <sup>*</sup> | additive<br>dominant | 4.84 X 10 <sup>-11</sup><br>3.20 X 10 <sup>-13</sup> |                                                                                             | 0.019         |
| 12 | 14,220,951  | <i>rs42421894</i>               | dominant             | 4.87 X 10 <sup>-11</sup>                             |                                                                                             | 0.019<br>0.03 |
| 12 | 16,306,649  | <i>rs110474118</i>              | dominant             | 2.00 X 10 <sup>-9</sup>                              | <i>LCPI</i> <sup>‡</sup>                                                                    | 0.016         |
| 12 | 17,136,529  | <i>rs136450224</i>              | dominant             | 2.08 X 10 <sup>-8</sup>                              |                                                                                             | 0.016         |
| 12 | 19,384,047  | <i>rs133433961</i>              | additive<br>dominant | 4.68 X 10 <sup>-13</sup><br>2.28 X 10 <sup>-20</sup> | <i>KPNA3</i> <sup>‡</sup><br><i>LOC783060</i>                                               | 0.02          |
| 12 | 21,400,380  | <i>rs133119471</i>              | dominant             | 2.23 X 10 <sup>-8</sup>                              | <i>ATP7B</i><br><i>CCDC70</i>                                                               | 0.016         |
| 12 | 21,798,093  | <i>rs110859101</i>              | dominant             | 1.67 X 10 <sup>-10</sup>                             | <i>LOC516736</i><br><i>SLC25A15</i>                                                         | 0.02<br>0.017 |
| 12 | 22,621,092  | <i>rs136870702</i>              | dominant             | 7.52 X 10 <sup>-11</sup>                             |                                                                                             | 0.024         |
| 12 | 43,799,317  | <i>rs29017133</i>               | dominant             | 2.95 X 10 <sup>-8</sup>                              |                                                                                             | 0.017 0.017   |
| 12 | 43,939,457  | <i>rs133296292</i>              | additive<br>dominant | 1.29 X 10 <sup>-11</sup><br>1.29 X 10 <sup>-11</sup> |                                                                                             | 0.023 0.023   |
| 12 | 44,369,482  | <i>rs136399659</i>              | dominant             | 7.41 X 10 <sup>-11</sup>                             | <i>KLHL1</i> <sup>‡</sup>                                                                   | 0.028 0.033   |
| 12 | 48,647,199  | <i>rs135959058</i>              | recessive            | 6.62 X 10 <sup>-9</sup>                              |                                                                                             | 0.018         |

|    |            |                    |                      |                                                      |                                                             |               |
|----|------------|--------------------|----------------------|------------------------------------------------------|-------------------------------------------------------------|---------------|
| 12 | 58,518,230 | <i>rs110718934</i> | additive             | 4.90 X 10 <sup>-9</sup>                              |                                                             | 0.023         |
| 12 | 61,404,223 | <i>rs136725238</i> | dominant             | 1.91 X 10 <sup>-8</sup>                              |                                                             | 0.016         |
| 12 | 81,780,656 | <i>rs135307240</i> | dominant             | 4.82 X 10 <sup>-8</sup>                              | <i>NALCN</i> <sup>†</sup>                                   | 0.021 0.031   |
| 12 | 82,705,374 | <i>rs109399990</i> | dominant             | 8.33 X 10 <sup>-9</sup>                              | <i>FGF14</i> <sup>†</sup>                                   | 0.017         |
| 12 | 82,890,429 | <i>rs110783012</i> | dominant             | 2.51 X 10 <sup>-8</sup>                              | <i>TPP2</i> <sup>†</sup>                                    | 0.017 0.026   |
| 13 | 1,247,948  | <i>rs43711088</i>  | additive<br>dominant | 2.28 X 10 <sup>-16</sup><br>2.28 X 10 <sup>-16</sup> | <i>PLCB1</i> <sup>†</sup>                                   | 0.018         |
| 13 | 2,264,173  | <i>rs41676079</i>  | dominant             | 4.20 X 10 <sup>-8</sup>                              | <i>PLCB4</i> <sup>†</sup>                                   | 0.017         |
| 13 | 8,920,866  | <i>rs41679483</i>  | dominant             | 1.64 X 10 <sup>-9</sup>                              | <i>MACROD2</i> <sup>†</sup>                                 | 0.032 0.036   |
| 13 | 19,311,965 | <i>rs137544619</i> | dominant             | 4.73 X 10 <sup>-9</sup>                              | <i>PARD3</i> <sup>†</sup>                                   | 0.018         |
| 13 | 30,062,520 | <i>rs109947626</i> | dominant             | 1.87 X 10 <sup>-8</sup>                              | <i>FAM171A1</i>                                             | 0.018 0.028   |
| 13 | 31,920,795 | <i>rs109574513</i> | dominant             | 1.81 X 10 <sup>-9</sup>                              | <i>TRDMT1</i> <sup>†</sup>                                  | 0.026         |
| 13 | 32,879,609 | <i>rs109617842</i> | additive<br>dominant | 5.54 X 10 <sup>-12</sup><br>1.81 X 10 <sup>-16</sup> | <i>CACNB2</i> <sup>†</sup>                                  | 0.019         |
| 13 | 35,842,851 | <i>rs135323330</i> | dominant             | 1.74 X 10 <sup>-8</sup>                              |                                                             | 0.031 0.031   |
| 13 | 42,137,191 | <i>rs41687892</i>  | dominant             | 9.65 X 10 <sup>-9</sup>                              | <i>TRNAS-GGA</i>                                            | 0.017         |
| 13 | 45,484,656 | <i>rs42628484</i>  | additive<br>dominant | 4.54 X 10 <sup>-8</sup><br>3.89 X 10 <sup>-8</sup>   | <i>PFKP</i><br><i>PITRM1</i> <sup>†</sup>                   | 0.02<br>0.019 |
| 13 | 46,208,034 | <i>rs41699216</i>  | dominant             | 1.46 X 10 <sup>-8</sup>                              |                                                             | 0.018 0.032   |
| 13 | 57,799,152 | <i>rs41566209</i>  | dominant             | 1.13 X 10 <sup>-8</sup>                              |                                                             | 0.016         |
| 13 | 58,245,216 | <i>rs137096935</i> | additive             | 1.79 X 10 <sup>-9</sup>                              | <i>STX16</i> <sup>†</sup>                                   | 0.017 0.025   |
| 13 | 58,333,285 | <i>rs132864771</i> | dominant             | 7.57 X 10 <sup>-12</sup>                             |                                                             | 0.019         |
| 14 | 1,514,056  | <i>rs41630614</i>  | dominant             | 8.53 X 10 <sup>-9</sup>                              | <i>COMMD5</i><br><i>RPL8</i><br><i>ZNF34</i><br><i>ZNF7</i> | 0.02<br>0.028 |
| 14 | 2,198,215  | <i>rs110288957</i> | dominant             | 1.65 X 10 <sup>-8</sup>                              | <i>SCRIB</i> <sup>†</sup>                                   | 0.019         |
| 14 | 12,011,754 | <i>rs109257200</i> | recessive            | 9.80 X 10 <sup>-12</sup>                             |                                                             | 0.016         |
| 14 | 14,183,625 | <i>rs135029808</i> | dominant             | 4.11 X 10 <sup>-8</sup>                              |                                                             | 0.027 0.044   |
| 14 | 17,291,481 | <i>rs41839430</i>  | dominant             | 3.09 X 10 <sup>-8</sup>                              | <i>TMEM65</i> <sup>†</sup>                                  | 0.02<br>0.022 |
| 14 | 20,508,616 | <i>rs136484948</i> | dominant             | 5.02 X 10 <sup>-9</sup>                              |                                                             | 0.02          |
| 14 | 21,358,853 | <i>rs135136778</i> | additive<br>dominant | 4.71 X 10 <sup>-10</sup><br>1.11 X 10 <sup>-10</sup> |                                                             | 0.024         |
| 14 | 23,508,165 | <i>rs41730395</i>  | additive<br>dominant | 1.71 X 10 <sup>-11</sup><br>1.71 X 10 <sup>-11</sup> | <i>ATP6V1H</i>                                              | 0.02          |

|    |            |                      |                      |                                                  |                                                                               |             |
|----|------------|----------------------|----------------------|--------------------------------------------------|-------------------------------------------------------------------------------|-------------|
| 14 | 25,425,357 | <i>rs41722033</i>    | additive<br>dominant | $6.74 \times 10^{-10}$<br>$7.03 \times 10^{-15}$ | <i>LOC1019076</i><br>67                                                       | 0.016 0.026 |
| 14 | 25,633,578 | <i>rs134826452</i>   | additive<br>dominant | $7.83 \times 10^{-21}$<br>$7.83 \times 10^{-21}$ |                                                                               | 0.017 0.017 |
| 14 | 28,634,983 | <i>rs135570111</i>   | dominant             | $4.89 \times 10^{-9}$                            | <i>CLVS1</i> <sup>†</sup>                                                     | 0.019       |
| 14 | 41,600,948 | <i>rs137036103</i> * | dominant             | $9.60 \times 10^{-9}$                            |                                                                               | 0.022 0.026 |
| 14 | 43,099,166 | <i>rs42856301</i>    | additive<br>dominant | $1.31 \times 10^{-14}$<br>$1.31 \times 10^{-14}$ |                                                                               | 0.02        |
| 14 | 43,953,144 | <i>rs134492410</i>   | additive<br>dominant | $1.72 \times 10^{-9}$<br>$1.55 \times 10^{-11}$  | <i>PKIA</i> <sup>†</sup>                                                      | 0.023 0.031 |
| 14 | 43,995,061 | <i>rs134590876</i>   | dominant             | $6.19 \times 10^{-9}$                            | <i>PKIA</i>                                                                   | 0.025 0.032 |
| 14 | 45,667,262 | <i>rs136545426</i>   | dominant             | $3.59 \times 10^{-10}$                           | <i>LOC1001384</i><br>99                                                       | 0.024 0.024 |
| 14 | 50,291,072 | <i>rs41913814</i>    | recessive            | $1.21 \times 10^{-12}$                           |                                                                               | 0.016 0.017 |
| 14 | 60,686,566 | <i>rs137829593</i>   | additive<br>dominant | $8.67 \times 10^{-12}$<br>$8.67 \times 10^{-12}$ |                                                                               | 0.016 0.021 |
| 14 | 61,546,318 | <i>rs132917548</i>   | dominant             | $2.31 \times 10^{-8}$                            |                                                                               | 0.02        |
| 14 | 70,639,444 | <i>rs109864366</i>   | dominant             | $9.25 \times 10^{-9}$                            |                                                                               | 0.016 0.026 |
| 14 | 78,909,801 | <i>rs134190366</i>   | dominant             | $1.28 \times 10^{-8}$                            | <i>ATP6V0D2</i> <sup>†</sup>                                                  | 0.129 0.129 |
| 14 | 84,114,637 | <i>rs108991276</i>   | dominant             | $9.13 \times 10^{-9}$                            | <i>COL14A1</i><br><i>MRPL13</i>                                               | 0.022       |
| 14 | 84,342,736 | <i>rs133125476</i>   | dominant             | $4.09 \times 10^{-9}$                            | <i>SNTB1</i> <sup>†</sup>                                                     | 0.019 0.018 |
| 15 | 2,135,130  | <i>rs136034166</i>   | additive<br>dominant | $1.83 \times 10^{-9}$<br>$1.65 \times 10^{-14}$  | <i>GRIA4</i> <sup>†</sup>                                                     | 0.019       |
| 15 | 5,208,201  | <i>rs41662040</i>    | additive<br>dominant | $2.41 \times 10^{-9}$<br>$1.07 \times 10^{-11}$  |                                                                               | 0.018       |
| 15 | 5,246,327  | <i>rs133630731</i>   | dominant             | $3.05 \times 10^{-8}$                            |                                                                               | 0.021 0.018 |
| 15 | 22,458,768 | <i>rs41596221</i> *  | dominant             | $6.85 \times 10^{-9}$                            | <i>ALG9</i> <sup>†</sup>                                                      | 0.021       |
| 15 | 25,669,397 | <i>rs109391843</i>   | dominant             | $1.56 \times 10^{-9}$                            |                                                                               | 0.017       |
| 15 | 30,935,833 | <i>rs41756356</i>    | dominant             | $1.13 \times 10^{-8}$                            |                                                                               | 0.018       |
| 15 | 47,135,215 | <i>rs109396578</i>   | additive             | $3.57 \times 10^{-9}$                            | <i>DNHD1</i> <sup>†</sup>                                                     | 0.032 0.032 |
| 15 | 49,853,609 | <i>rs134423901</i> * | dominant             | $1.99 \times 10^{-8}$                            | <i>LOC1003372</i><br>65<br><i>LOC1008474</i><br>30<br><i>LOC1008474</i><br>55 | 0.016       |



|    |            |                    |                      |                                                      |                                                                                  |                |
|----|------------|--------------------|----------------------|------------------------------------------------------|----------------------------------------------------------------------------------|----------------|
| 15 | 54,722,255 | <i>rs41770954</i>  | dominant             | 2.50 X 10 <sup>-13</sup>                             | <i>POLD3</i> <sup>†</sup>                                                        | 0.017          |
| 15 | 55,552,388 | <i>rs137402563</i> | additive<br>dominant | 9.72 X 10 <sup>-13</sup><br>9.72 X 10 <sup>-13</sup> | <i>MAP6</i> <sup>†</sup>                                                         | 0.018 0.028    |
| 15 | 61,669,862 | <i>rs109416226</i> | additive<br>dominant | 9.26 X 10 <sup>-11</sup><br>6.42 X 10 <sup>-11</sup> |                                                                                  | 0.017          |
| 15 | 63,247,583 | <i>rs135885524</i> | additive<br>dominant | 2.61 X 10 <sup>-10</sup><br>5.53 X 10 <sup>-10</sup> | <i>ELP4</i> <sup>†</sup>                                                         | 0.018 0.033    |
| 15 | 67,825,769 | <i>rs133312284</i> | dominant             | 7.96 X 10 <sup>-10</sup>                             | <i>RAG1</i> <sup>†</sup>                                                         | 0.017 0.029    |
| 15 | 71,759,045 | <i>rs134381641</i> | dominant             | 9.92 X 10 <sup>-9</sup>                              | <i>LRRC4C</i> <sup>†</sup>                                                       | 0.021 0.022    |
| 15 | 77,101,592 | <i>rs135114146</i> | dominant             | 3.62 X 10 <sup>-8</sup>                              |                                                                                  | 0.028 0.028    |
| 15 | 84,195,776 | <i>rs29021878</i>  | additive<br>dominant | 2.56 X 10 <sup>-10</sup><br>1.04 X 10 <sup>-10</sup> | <i>LOC1019074</i><br><i>07 PATL1</i>                                             | 0.02           |
| 16 | 510,040    | <i>rs41785918</i>  | dominant             | 4.66 X 10 <sup>-8</sup>                              | <i>TMEM183A</i>                                                                  | 0.016          |
| 16 | 13,537,834 | <i>rs137170596</i> | additive<br>dominant | 1.76 X 10 <sup>-8</sup><br>9.17 X 10 <sup>-10</sup>  | <i>RGS21</i> <sup>†</sup>                                                        | 0.016<br>0.02  |
| 16 | 15,473,841 | <i>rs135148389</i> | additive<br>dominant | 1.90 X 10 <sup>-8</sup><br>1.90 X 10 <sup>-8</sup>   |                                                                                  | 0.034 0.034    |
| 16 | 15,481,171 | <i>rs134711585</i> | additive<br>dominant | 5.58 X 10 <sup>-12</sup><br>4.36 X 10 <sup>-13</sup> |                                                                                  | 0.02<br>0.028  |
| 16 | 16,473,798 | <i>rs133881641</i> | dominant             | 4.70 X 10 <sup>-8</sup>                              |                                                                                  | 0.016 0.021    |
| 16 | 20,500,260 | <i>rs110701354</i> | additive<br>dominant | 2.22 X 10 <sup>-20</sup><br>2.22 X 10 <sup>-20</sup> | <i>USH2A</i> <sup>†</sup>                                                        | 0.021 0.021    |
| 16 | 22,523,720 | <i>rs108994652</i> | dominant             | 1.74 X 10 <sup>-8</sup>                              | <i>TGFB2</i> <sup>†</sup>                                                        | 0.024 0.026    |
| 16 | 34,026,492 | <i>rs42936399</i>  | dominant             | 1.65 X 10 <sup>-8</sup>                              |                                                                                  | 0.017          |
| 16 | 35,683,918 | <i>rs134810606</i> | dominant             | 4.20 X 10 <sup>-9</sup>                              | <i>BECN2</i><br><i>LOC1049744</i><br><i>09</i><br><i>LOC1049744</i><br><i>10</i> | 0.018<br>0.016 |
| 16 | 38,054,540 | <i>rs110343387</i> | dominant             | 8.33 X 10 <sup>-9</sup>                              | <i>SELP</i> <sup>†</sup>                                                         | 0.017          |
| 16 | 40,004,888 | <i>rs41804723</i>  | additive<br>dominant | 1.04 X 10 <sup>-9</sup><br>4.61 X 10 <sup>-12</sup>  | <i>VAMP4</i> <sup>†</sup>                                                        | 0.018          |
| 16 | 42,464,695 | <i>rs134524715</i> | recessive            | 1.21 X 10 <sup>-8</sup>                              | <i>TNFRSF8</i> <sup>†</sup>                                                      | 0.023          |
| 16 | 55,725,736 | <i>rs43039941</i>  | additive<br>dominant | 5.29 X 10 <sup>-10</sup><br>3.23 X 10 <sup>-8</sup>  | <i>LOC1003364</i><br><i>25</i><br><i>LOC520023</i>                               | 0.019          |

|    |            |                     |                      |                                                  |                                                           |             |
|----|------------|---------------------|----------------------|--------------------------------------------------|-----------------------------------------------------------|-------------|
|    |            |                     |                      |                                                  | <i>LOC529969</i><br><i>LOC789197</i>                      |             |
| 16 | 60,351,587 | <i>rs109008645</i>  | dominant             | $4.25 \times 10^{-9}$                            | <i>LOC1049744</i><br><i>82<sup>†</sup></i>                | 0.018       |
| 16 | 65,396,450 | <i>rs133026423</i>  | additive<br>dominant | $4.20 \times 10^{-11}$<br>$7.89 \times 10^{-17}$ | <i>DHX9<sup>†</sup></i><br><i>LOC1019058</i><br><i>57</i> | 0.028       |
| 16 | 67,766,937 | <i>rs42465725</i>   | additive<br>dominant | $3.70 \times 10^{-9}$<br>$2.40 \times 10^{-15}$  | <i>IVNS1ABP<sup>†</sup></i><br><i>SWT1</i>                | 0.021 0.019 |
| 16 | 69,744,456 | <i>rs42385478</i>   | dominant             | $3.93 \times 10^{-8}$                            |                                                           | 0.016       |
| 16 | 69,808,920 | <i>rs42378772</i>   | additive<br>dominant | $1.97 \times 10^{-12}$<br>$4.53 \times 10^{-15}$ |                                                           | 0.019       |
| 16 | 72,801,288 | <i>rs41823539</i>   | dominant             | $2.61 \times 10^{-8}$                            | <i>ATF3</i><br><i>FAM71A</i>                              | 0.019       |
| 16 | 77,514,553 | <i>rs136158697</i>  | dominant             | $2.66 \times 10^{-8}$                            | <i>CD46<sup>†</sup></i>                                   | 0.026 0.028 |
| 17 | 4,548,256  | <i>rs110253313</i>  | additive<br>dominant | $6.55 \times 10^{-9}$<br>$1.63 \times 10^{-10}$  |                                                           | 0.022 0.027 |
| 17 | 4,755,665  | <i>rs41639843</i>   | dominant             | $4.53 \times 10^{-8}$                            | <i>ARFIP1<sup>†</sup></i>                                 | 0.017       |
| 17 | 7,238,905  | <i>rs42503264</i>   | additive<br>dominant | $3.99 \times 10^{-11}$<br>$3.63 \times 10^{-14}$ | <i>LRBA<sup>†</sup></i><br><i>MAB21L2</i>                 | 0.019       |
| 17 | 11,531,170 | <i>rs110801333*</i> | dominant             | $1.02 \times 10^{-9}$                            | <i>TTC29<sup>†</sup></i>                                  | 0.019       |
| 17 | 11,543,183 | <i>rs110144635*</i> | dominant             | $2.52 \times 10^{-8}$                            | <i>TTC29<sup>†</sup></i>                                  | 0.019       |
| 17 | 14,147,211 | <i>rs135563413*</i> | additive<br>dominant | $2.11 \times 10^{-8}$<br>$2.73 \times 10^{-15}$  | <i>TRNAG-</i><br><i>UCC</i>                               | 0.02        |
| 17 | 14,477,434 | <i>rs110372003*</i> | dominant             | $1.17 \times 10^{-9}$                            |                                                           | 0.021       |
| 17 | 19,532,664 | <i>rs109506894</i>  | dominant             | $3.54 \times 10^{-8}$                            |                                                           | 0.016       |
| 17 | 28,295,990 | <i>rs109063837</i>  | dominant             | $2.30 \times 10^{-10}$                           |                                                           | 0.016       |
| 17 | 31,095,739 | <i>rs42945744</i>   | dominant             | $4.63 \times 10^{-8}$                            |                                                           | 0.016 0.016 |
| 17 | 32,284,932 | <i>rs110556114</i>  | dominant             | $1.73 \times 10^{-11}$                           |                                                           | 0.019 0.019 |
| 17 | 34,336,560 | <i>rs109571195</i>  | dominant             | $2.24 \times 10^{-8}$                            |                                                           | 0.019       |
| 17 | 37,352,797 | <i>rs109750304</i>  | dominant             | $3.47 \times 10^{-9}$                            | <i>FSTL5<sup>†</sup></i>                                  | 0.019       |
| 17 | 40,345,468 | <i>rs110378748</i>  | additive<br>dominant | $2.21 \times 10^{-14}$<br>$1.00 \times 10^{-18}$ |                                                           | 0.021       |
| 17 | 41,089,654 | <i>rs110704136</i>  | additive<br>dominant | $2.23 \times 10^{-11}$<br>$3.20 \times 10^{-13}$ | <i>FNIP2<sup>†</sup></i>                                  | 0.017       |

|    |            |                     |                      |                                                      |                                                                                     |               |
|----|------------|---------------------|----------------------|------------------------------------------------------|-------------------------------------------------------------------------------------|---------------|
| 17 | 44,261,883 | <i>rs41906864*</i>  | dominant             | 9.65 X 10 <sup>-10</sup>                             |                                                                                     | 0.02<br>0.016 |
| 17 | 46,125,255 | <i>rs110610109</i>  | dominant             | 4.84 X 10 <sup>-8</sup>                              | <i>EP400</i> <sup>†</sup>                                                           | 0.02          |
| 17 | 47,203,601 | <i>rs41844776</i>   | dominant             | 5.65 X 10 <sup>-11</sup>                             | <i>ADGRD1</i><br><i>TRNAW-</i><br><i>CCA</i>                                        | 0.017         |
| 17 | 54,321,728 | <i>rs136973422</i>  | dominant             | 1.15 X 10 <sup>-8</sup>                              | <i>DDX55</i> <sup>†</sup>                                                           | 0.018         |
| 17 | 55,237,847 | <i>rs136539859</i>  | additive<br>dominant | 3.79 X 10 <sup>-11</sup><br>3.79 X 10 <sup>-11</sup> | <i>CLIP1</i>                                                                        | 0.018         |
| 17 | 57,905,713 | <i>rs41846781</i>   | additive<br>dominant | 2.94 X 10 <sup>-11</sup><br>9.53 X 10 <sup>-15</sup> | <i>CIT</i> <sup>‡</sup><br><i>LOC1049746</i><br><i>48</i>                           | 0.015         |
| 17 | 57,934,917 | <i>rs137751476</i>  | dominant             | 2.88 X 10 <sup>-9</sup>                              | <i>CIT</i> <sup>‡</sup>                                                             | 0.019         |
| 17 | 62,614,798 | <i>rs110449993</i>  | additive<br>dominant | 6.18 X 10 <sup>-9</sup><br>6.18 X 10 <sup>-9</sup>   |                                                                                     | 0.039 0.039   |
| 17 | 65,811,553 | <i>rs41854091</i>   | dominant             | 6.21 X 10 <sup>-10</sup>                             |                                                                                     | 0.02          |
| 17 | 68,230,867 | <i>rs135956985</i>  | recessive            | 3.08 X 10 <sup>-8</sup>                              | <i>SEZ6L</i> <sup>†</sup>                                                           | 0.025         |
| 18 | 4,244,018  | <i>rs41861636</i>   | dominant             | 1.71 X 10 <sup>-8</sup>                              |                                                                                     | 0.035         |
| 18 | 13,054,633 | <i>rs109071329</i>  | dominant             | 1.72 X 10 <sup>-8</sup>                              | <i>ZCCHC14</i> <sup>†</sup>                                                         | 0.025 0.041   |
| 18 | 21,080,949 | <i>rs132676005</i>  | dominant             | 3.79 X 10 <sup>-9</sup>                              | <i>TOX3</i> <sup>†</sup>                                                            | 0.016         |
| 18 | 21,929,721 | <i>rs41872094</i>   | additive<br>dominant | 3.33 X 10 <sup>-10</sup><br>5.08 X 10 <sup>-13</sup> | <i>AKTIP</i> <sup>†</sup> <i>RBL2</i>                                               | 0.019         |
| 18 | 22,133,647 | <i>rs110817255</i>  | dominant             | 8.02 X 10 <sup>-10</sup>                             | <i>FTO</i> <sup>†</sup>                                                             | 0.018 0.025   |
| 18 | 25,406,362 | <i>rs135881758</i>  | dominant             | 1.43 X 10 <sup>-8</sup>                              | <i>TRNAL-CAG</i>                                                                    | 0.025 0.024   |
| 18 | 41,341,040 | <i>rs41874978*</i>  | dominant             | 2.82 X 10 <sup>-11</sup>                             | <i>ZNF536</i> <sup>†</sup>                                                          | 0.018         |
| 18 | 42,326,718 | <i>rs41855620</i>   | dominant             | 1.23 X 10 <sup>-9</sup>                              | <i>LOC783434</i> <sup>†</sup>                                                       | 0.017         |
| 18 | 48,080,342 | <i>rs110004030</i>  | dominant             | 1.89 X 10 <sup>-9</sup>                              | <i>SIPA1L3</i> <sup>†</sup>                                                         | 0.017         |
| 18 | 60,502,979 | <i>rs43726266*</i>  | dominant             | 3.39 X 10 <sup>-8</sup>                              | <i>LOC788871</i> <sup>†</sup>                                                       | 0.017         |
| 18 | 62,610,581 | <i>rs109045973</i>  | additive<br>dominant | 4.37 X 10 <sup>-10</sup><br>1.67 X 10 <sup>-12</sup> | <i>BRSK1</i><br><i>LOC1049749</i><br><i>50</i><br><i>TMEM150B</i> <sup>†</sup>      | 0.017 0.024   |
| 18 | 65,112,331 | <i>rs133139781*</i> | additive<br>dominant | 5.09 X 10 <sup>-9</sup><br>1.79 X 10 <sup>-15</sup>  | <i>LOC1049749</i><br><i>70</i><br><i>LOC790271</i> <sup>†</sup><br><i>LOC790271</i> | 0.018 0.022   |

|    |            |                     |                       |                                                      | TRNAW-<br>CCA                                             |             |
|----|------------|---------------------|-----------------------|------------------------------------------------------|-----------------------------------------------------------|-------------|
| 19 | 7,771,626  | <i>rs110084507</i>  | dominant              | 1.73 X 10 <sup>-8</sup>                              |                                                           | 0.035 0.035 |
| 19 | 8,114,894  | <i>rs109147231</i>  | dominant              | 8.11 X 10 <sup>-10</sup>                             |                                                           | 0.019       |
| 19 | 8,755,982  | <i>rs135740624</i>  | additive<br>dominant  | 6.63 X 10 <sup>-10</sup><br>2.76 X 10 <sup>-9</sup>  |                                                           | 0.021       |
| 19 | 20,467,790 | <i>rs135360951</i>  | additive<br>dominant  | 9.28 X 10 <sup>-9</sup><br>4.76 X 10 <sup>-11</sup>  | <i>SLC46A1</i>                                            | 0.026       |
| 19 | 24,125,771 | <i>rs137270020</i>  | additive<br>dominant  | 3.56 X 10 <sup>-16</sup><br>3.56 X 10 <sup>-16</sup> | <i>LOC1003361<br/>61<br/>PAFAH1B1<sup>†</sup></i>         | 0.021       |
| 19 | 36,438,190 | <i>rs109963616*</i> | dominant              | 1.62 X 10 <sup>-11</sup>                             | <i>SPAG9</i>                                              | 0.017 0.023 |
| 19 | 36,455,088 | <i>rs41914197*</i>  | dominant              | 3.04 X 10 <sup>-9</sup>                              |                                                           | 0.016       |
| 19 | 36,603,139 | <i>rs133431883*</i> | dominant              | 7.58 X 10 <sup>-11</sup>                             | <i>LOC512899<br/>LUC7L3</i>                               | 0.022       |
| 19 | 36,634,826 | <i>rs42624363*</i>  | dominant              | 2.43 X 10 <sup>-9</sup>                              | <i>LUC7L3<sup>†</sup></i>                                 | 0.025 0.039 |
| 19 | 36,647,418 | <i>rs137150056*</i> | dominant              | 2.75 X 10 <sup>-10</sup>                             | <i>LOC786793<sup>†</sup></i>                              | 0.018       |
| 19 | 47,475,942 | <i>rs41917870</i>   | additive<br>recessive | 3.30 X 10 <sup>-8</sup><br>8.34 X 10 <sup>-10</sup>  | <i>EFCAB3<sup>†</sup></i>                                 | 0.016 0.018 |
| 19 | 48,613,006 | <i>rs41921835</i>   | additive<br>dominant  | 3.41 X 10 <sup>-12</sup><br>1.21 X 10 <sup>-14</sup> | <i>LIMD2<br/>MAP3K3<sup>†</sup><br/>STRADA</i>            | 0.016 0.022 |
| 19 | 48,761,018 | <i>rs41923460</i>   | additive              | 1.81 X 10 <sup>-8</sup>                              | <i>GH1<br/>SMARCD2<br/>TCAM1</i>                          | 0.018       |
| 19 | 51,861,727 | <i>rs41600337</i>   | additive<br>dominant  | 3.40 X 10 <sup>-9</sup><br>9.14 X 10 <sup>-12</sup>  | <i>ACTG1<br/>FAAP100<br/>FSCN2<br/>MIR3533</i>            | 0.019 0.037 |
| 19 | 53,443,757 | <i>rs110291598</i>  | dominant              | 6.86 X 10 <sup>-9</sup>                              |                                                           | 0.018       |
| 19 | 56,555,839 | <i>rs137804276</i>  | additive<br>dominant  | 4.86 X 10 <sup>-8</sup><br>2.48 X 10 <sup>-12</sup>  | <i>RECQL5<sup>†</sup><br/>SAP30BP<br/>SMIM5<br/>SMIM6</i> | 0.02        |
| 19 | 58,347,709 | <i>rs109193093</i>  | additive<br>dominant  | 1.53 X 10 <sup>-8</sup><br>1.53 X 10 <sup>-8</sup>   | <i>SDK2<sup>†</sup></i>                                   | 0.019 0.024 |

|    |            |                     |                      |                                                  |                                                  |             |
|----|------------|---------------------|----------------------|--------------------------------------------------|--------------------------------------------------|-------------|
| 20 | 11,320,893 | <i>rs133688167</i>  | additive<br>dominant | $4.89 \times 10^{-10}$<br>$1.16 \times 10^{-13}$ | <i>PIK3R1</i>                                    | 0.016       |
| 20 | 17,522,768 | <i>rs135293700</i>  | additive<br>dominant | $6.32 \times 10^{-9}$<br>$1.83 \times 10^{-11}$  | <i>TRNAG-<br/>CCC</i>                            | 0.031 0.031 |
| 20 | 20,534,357 | <i>rs137021158</i>  | dominant             | $4.03 \times 10^{-8}$                            | <i>RAB3C<sup>‡</sup></i>                         | 0.018       |
| 20 | 28,016,050 | <i>rs137681615</i>  | additive<br>dominant | $1.81 \times 10^{-8}$<br>$1.01 \times 10^{-9}$   |                                                  | 0.02        |
| 20 | 28,255,221 | <i>rs133442114</i>  | dominant             | $5.87 \times 10^{-10}$                           |                                                  | 0.019       |
| 20 | 28,553,271 | <i>rs136316656</i>  | additive<br>dominant | $8.92 \times 10^{-9}$<br>$1.51 \times 10^{-10}$  |                                                  | 0.044 0.044 |
| 20 | 32,650,164 | <i>rs110765367</i>  | dominant             | $4.02 \times 10^{-8}$                            |                                                  | 0.016       |
| 20 | 34,621,058 | <i>rs41942122</i>   | dominant             | $2.26 \times 10^{-8}$                            |                                                  | 0.017       |
| 20 | 41,389,949 | <i>rs136889965</i>  | dominant             | $2.24 \times 10^{-8}$                            | <i>MTMR12<sup>‡</sup></i>                        | 0.017       |
| 20 | 42,618,265 | <i>rs137766956*</i> | dominant             | $1.28 \times 10^{-8}$                            |                                                  | 0.024 0.026 |
| 20 | 51,811,579 | <i>rs135702037*</i> | dominant             | $6.38 \times 10^{-9}$                            |                                                  | 0.02 0.02   |
| 20 | 53,074,084 | <i>rs135839614</i>  | dominant             | $1.36 \times 10^{-9}$                            |                                                  | 0.017 0.022 |
| 20 | 54,923,630 | <i>rs132897552</i>  | dominant             | $2.82 \times 10^{-8}$                            |                                                  | 0.016 0.026 |
| 20 | 56,531,652 | <i>rs135191929</i>  | additive<br>dominant | $1.84 \times 10^{-8}$<br>$1.17 \times 10^{-13}$  | <i>MYO10<sup>‡</sup></i>                         | 0.023       |
| 20 | 57,113,135 | <i>rs41956232</i>   | additive<br>dominant | $6.76 \times 10^{-10}$<br>$9.60 \times 10^{-13}$ | <i>March11<sup>‡</sup></i>                       | 0.016 0.022 |
| 20 | 57,773,680 | <i>rs135111737</i>  | dominant             | $3.53 \times 10^{-10}$                           | <i>FBXL7<sup>‡</sup></i>                         | 0.019       |
| 20 | 58,444,700 | <i>rs134221395</i>  | additive<br>dominant | $3.37 \times 10^{-8}$<br>$2.79 \times 10^{-8}$   | <i>ANKH<sup>‡</sup></i><br><i>TRNAG-<br/>UCC</i> | 0.016       |
| 20 | 60,649,127 | <i>rs42536899</i>   | dominant             | $9.40 \times 10^{-10}$                           |                                                  | 0.022       |
| 20 | 66,175,689 | <i>rs110981497</i>  | dominant             | $1.02 \times 10^{-8}$                            |                                                  | 0.017       |
| 20 | 66,434,683 | <i>rs41960759</i>   | dominant             | $4.08 \times 10^{-9}$                            |                                                  | 0.018       |
| 20 | 67,303,443 | <i>rs41977686</i>   | additive<br>dominant | $1.76 \times 10^{-9}$<br>$1.28 \times 10^{-9}$   |                                                  | 0.015       |
| 21 | 9,179,282  | <i>rs135625205</i>  | additive<br>dominant | $1.26 \times 10^{-9}$<br>$2.21 \times 10^{-10}$  |                                                  | 0.017       |
| 21 | 14,800,548 | <i>rs41619364</i>   | dominant             | $3.51 \times 10^{-10}$                           | <i>LOC785523</i>                                 | 0.016       |
| 21 | 19,191,643 | <i>rs41968656*</i>  | dominant             | $3.39 \times 10^{-10}$                           |                                                  | 0.022       |
| 21 | 22,547,601 | <i>rs133488994</i>  | dominant             | $1.66 \times 10^{-10}$                           | <i>IQGAP1<sup>‡</sup></i>                        | 0.019 0.025 |
| 21 | 25,754,672 | <i>rs109417706*</i> | additive<br>dominant | $3.00 \times 10^{-9}$<br>$3.00 \times 10^{-9}$   | <i>RASGRF1<sup>‡</sup></i>                       | 0.017       |

|    |            |                    |                      |                                                  |                                       |               |
|----|------------|--------------------|----------------------|--------------------------------------------------|---------------------------------------|---------------|
| 21 | 38,272,015 | <i>rs133180960</i> | additive<br>dominant | $8.67 \times 10^{-9}$<br>$6.92 \times 10^{-11}$  | <i>LOC785745</i>                      | 0.019 0.024   |
| 21 | 40,692,579 | <i>rs110658904</i> | additive<br>dominant | $2.88 \times 10^{-8}$<br>$2.33 \times 10^{-12}$  | <i>PRKD1</i> <sup>†</sup>             | 0.017         |
| 21 | 52,289,920 | <i>rs137802601</i> | dominant             | $1.30 \times 10^{-8}$                            |                                       | 0.028<br>0.04 |
| 21 | 53,293,514 | <i>rs133762978</i> | dominant             | $3.17 \times 10^{-10}$                           |                                       | 0.017         |
| 21 | 54,994,332 | <i>rs136941405</i> | dominant             | $8.84 \times 10^{-10}$                           |                                       | 0.017         |
| 21 | 65,862,391 | <i>rs41585303</i>  | additive             | $1.39 \times 10^{-8}$                            | <i>BCL11B</i> <sup>†</sup>            | 0.024         |
| 21 | 67,397,173 | <i>rs109800519</i> | additive<br>dominant | $4.34 \times 10^{-9}$<br>$3.48 \times 10^{-11}$  | <i>MEG3</i>                           | 0.016         |
| 21 | 69,347,110 | <i>rs109181868</i> | dominant             | $6.63 \times 10^{-9}$                            | <i>CDC42BPB</i>                       | 0.024         |
| 22 | 4,799,349  | <i>rs110535106</i> | dominant             | $2.65 \times 10^{-9}$                            |                                       | 0.02<br>0.018 |
| 22 | 6,613,617  | <i>rs134241191</i> | additive<br>dominant | $3.27 \times 10^{-8}$<br>$6.71 \times 10^{-10}$  | <i>TRNAG-<br/>CCC</i>                 | 0.025 0.027   |
| 22 | 7,883,649  | <i>rs134321851</i> | additive<br>dominant | $2.81 \times 10^{-10}$<br>$9.99 \times 10^{-16}$ | <i>CLASP2</i> <sup>†</sup>            | 0.016         |
| 22 | 9,972,687  | <i>rs42578220</i>  | additive<br>dominant | $1.06 \times 10^{-11}$<br>$1.13 \times 10^{-12}$ |                                       | 0.016         |
| 22 | 25,739,928 | <i>rs42643134</i>  | dominant             | $1.31 \times 10^{-8}$                            |                                       | 0.022<br>0.04 |
| 22 | 27,370,812 | <i>rs136691637</i> | dominant             | $5.84 \times 10^{-9}$                            | <i>CNTN3</i> <sup>†</sup>             | 0.03<br>0.04  |
| 22 | 28,846,011 | <i>rs136708885</i> | additive<br>dominant | $1.91 \times 10^{-13}$<br>$3.00 \times 10^{-19}$ | <i>GXYLT2</i> <sup>†</sup>            | 0.017         |
| 22 | 38,612,397 | <i>rs109985339</i> | additive<br>dominant | $1.73 \times 10^{-8}$<br>$5.87 \times 10^{-16}$  |                                       | 0.025 0.031   |
| 22 | 38,679,433 | <i>rs109836331</i> | dominant             | $1.76 \times 10^{-9}$                            | <i>CADPS</i>                          | 0.024         |
| 22 | 38,788,505 | <i>rs110891027</i> | additive             | $4.65 \times 10^{-8}$                            | <i>CADPS</i> <sup>†</sup>             | 0.016         |
| 22 | 39,159,742 | <i>rs135795816</i> | additive             | $8.98 \times 10^{-9}$                            | <i>PTPRG</i>                          | 0.018         |
| 22 | 41,859,997 | <i>rs42227841</i>  | dominant             | $4.47 \times 10^{-8}$                            | <i>FHIT</i> <sup>†</sup>              | 0.016         |
| 22 | 44,912,994 | <i>rs42011047</i>  | additive<br>dominant | $2.08 \times 10^{-11}$<br>$4.03 \times 10^{-10}$ | <i>FAM208A</i> <sup>†</sup>           | 0.016         |
| 22 | 46,275,925 | <i>rs42009542</i>  | additive<br>dominant | $1.38 \times 10^{-9}$<br>$1.66 \times 10^{-9}$   | <i>LOC1049755<br/>59</i> <sup>†</sup> | 0.016         |
| 22 | 48,223,561 | <i>rs41624710</i>  | dominant             | $2.67 \times 10^{-11}$                           | <i>DCP1A</i> <sup>†</sup>             | 0.018         |

|    |            |                     |                      |                                                      |                                                      |               |
|----|------------|---------------------|----------------------|------------------------------------------------------|------------------------------------------------------|---------------|
| 22 | 48,562,499 | <i>rs109398421</i>  | dominant             | 2.91 X 10 <sup>-8</sup>                              | <i>TMEM110</i> <sup>†</sup>                          | 0.017         |
| 22 | 50,701,770 | <i>rs42019299*</i>  | additive<br>dominant | 2.02 X 10 <sup>-8</sup><br>1.13 X 10 <sup>-10</sup>  | <i>GNAI2</i><br><i>SLC38A3</i><br><i>TRNAE-UUC</i>   | 0.024 0.033   |
| 22 | 60,033,741 | <i>rs42024541*</i>  | dominant             | 1.09 X 10 <sup>-8</sup>                              | <i>DNAJB8</i><br><i>GATA2</i><br><i>LOC101906160</i> | 0.016 0.021   |
| 22 | 61,292,355 | <i>rs110574162*</i> | dominant             | 6.07 X 10 <sup>-9</sup>                              | <i>KLF15</i> <sup>†</sup>                            | 0.022         |
| 23 | 1,171,440  | <i>rs137313677</i>  | dominant             | 4.78 X 10 <sup>-8</sup>                              |                                                      | 0.022         |
| 23 | 10,681,507 | <i>rs110034730</i>  | dominant             | 2.54 X 10 <sup>-8</sup>                              | <i>CPNE5</i> <sup>†</sup>                            | 0.02          |
| 23 | 11,601,873 | <i>rs135600509</i>  | additive<br>dominant | 1.46 X 10 <sup>-10</sup><br>9.30 X 10 <sup>-15</sup> | <i>MDGA1</i>                                         | 0.045 0.045   |
| 23 | 17,209,231 | <i>rs133988650</i>  | additive<br>dominant | 3.38 X 10 <sup>-8</sup><br>1.49 X 10 <sup>-9</sup>   | <i>LOC101904647</i>                                  | 0.021         |
| 23 | 20,320,655 | <i>rs109579148</i>  | dominant             | 3.24 X 10 <sup>-8</sup>                              |                                                      | 0.018 0.031   |
| 23 | 23,965,902 | <i>rs41634508</i>   | additive<br>dominant | 5.55 X 10 <sup>-25</sup><br>5.55 X 10 <sup>-25</sup> | <i>PKHD1</i> <sup>†</sup>                            | 0.019         |
| 23 | 24,775,092 | <i>rs133097021*</i> | dominant             | 1.75 X 10 <sup>-8</sup>                              |                                                      | 0.021 0.027   |
| 23 | 25,442,124 | <i>rs109992423*</i> | dominant             | 4.13 X 10 <sup>-9</sup>                              | <i>LOC100848815</i><br><i>LOC100851058</i>           | 0.017 0.034   |
| 23 | 34,332,434 | <i>rs133368886</i>  | additive<br>dominant | 1.21 X 10 <sup>-8</sup><br>2.88 X 10 <sup>-8</sup>   | <i>LOC780995</i>                                     | 0.017         |
| 23 | 34,453,204 | <i>rs110105721*</i> | additive<br>dominant | 1.83 X 10 <sup>-8</sup><br>1.41 X 10 <sup>-10</sup>  | <i>PRP8</i>                                          | 0.019         |
| 23 | 34,505,837 | <i>rs133953512*</i> | dominant             | 4.02 X 10 <sup>-10</sup>                             | <i>PRP6</i>                                          | 0.016 0.028   |
| 23 | 40,602,185 | <i>rs136999273</i>  | dominant             | 2.82 X 10 <sup>-9</sup>                              | <i>ATXN1</i> <sup>†</sup>                            | 0.016         |
| 23 | 42,391,390 | <i>rs136686460</i>  | dominant             | 1.97 X 10 <sup>-9</sup>                              |                                                      | 0.037 0.037   |
| 23 | 46,827,847 | <i>rs134836842</i>  | dominant             | 3.74 X 10 <sup>-8</sup>                              |                                                      | 0.016         |
| 23 | 47,335,140 | <i>rs109518863</i>  | dominant             | 6.34 X 10 <sup>-9</sup>                              | <i>TXNDC5</i> <sup>†</sup>                           | 0.019<br>0.02 |

|    |            |                     |                      |                                                      |                                                       |               |
|----|------------|---------------------|----------------------|------------------------------------------------------|-------------------------------------------------------|---------------|
| 24 | 6,039,397  | <i>rs43146766*</i>  | additive<br>dominant | 4.23 X 10 <sup>-8</sup><br>4.61 X 10 <sup>-11</sup>  |                                                       | 0.016         |
| 24 | 6,866,479  | <i>rs135250622*</i> | dominant             | 9.56 X 10 <sup>-10</sup>                             | <i>LOC104975731<sup>†</sup></i>                       | 0.02          |
| 24 | 15,172,605 | <i>rs109757717</i>  | dominant             | 4.24 X 10 <sup>-12</sup>                             |                                                       | 0.02          |
| 24 | 19,100,872 | <i>rs110602508</i>  | additive<br>dominant | 1.13 X 10 <sup>-8</sup><br>7.65 X 10 <sup>-14</sup>  |                                                       | 0.017 0.022   |
| 24 | 23,442,843 | <i>rs110264722</i>  | dominant             | 2.23 X 10 <sup>-11</sup>                             | <i>NOLA<sup>†</sup></i>                               | 0.017 0.022   |
| 24 | 28,498,009 | <i>rs135696977</i>  | dominant             | 4.06 X 10 <sup>-8</sup>                              |                                                       | 0.023         |
| 24 | 33,247,006 | <i>rs136755241</i>  | additive<br>dominant | 8.54 X 10 <sup>-9</sup><br>1.47 X 10 <sup>-8</sup>   | <i>LOC104968606<sup>†</sup></i>                       | 0.019 0.025   |
| 24 | 34,221,005 | <i>rs135529640</i>  | dominant             | 1.48 X 10 <sup>-8</sup>                              |                                                       | 0.083 0.083   |
| 24 | 36,648,988 | <i>rs109498992</i>  | additive<br>dominant | 2.37 X 10 <sup>-22</sup><br>2.37 X 10 <sup>-22</sup> |                                                       | 0.022 0.024   |
| 24 | 37,585,202 | <i>rs136377593</i>  | dominant             | 1.76 X 10 <sup>-12</sup>                             | <i>LPIN2<sup>†</sup></i>                              | 0.016         |
| 24 | 42,500,735 | <i>rs133226482</i>  | dominant             | 1.62 X 10 <sup>-8</sup>                              |                                                       | 0.022 0.022   |
| 24 | 46,912,208 | <i>rs109156282</i>  | additive<br>dominant | 9.37 X 10 <sup>-11</sup><br>1.32 X 10 <sup>-11</sup> | <i>ST8SIA5<sup>†</sup></i>                            | 0.02<br>0.026 |
| 24 | 49,798,018 | <i>rs109472635</i>  | additive<br>dominant | 1.96 X 10 <sup>-8</sup><br>1.10 X 10 <sup>-14</sup>  |                                                       | 0.02          |
| 24 | 57,467,913 | <i>rs109600414</i>  | additive<br>dominant | 2.73 X 10 <sup>-10</sup><br>6.90 X 10 <sup>-10</sup> | <i>ATP8B1<sup>†</sup></i>                             | 0.017         |
| 24 | 61,573,806 | <i>rs133176874</i>  | dominant             | 6.66 X 10 <sup>-16</sup>                             | <i>PHLPP1<sup>†</sup></i>                             | 0.017         |
| 24 | 62,451,691 | <i>rs133737149</i>  | dominant             | 1.86 X 10 <sup>-13</sup>                             | <i>BMP6</i><br><i>LOC101907314</i><br><i>TXNDC5</i>   | 0.018 0.022   |
| 25 | 3,497,319  | <i>rs133770356</i>  | dominant             | 4.37 X 10 <sup>-9</sup>                              | <i>GLIS2<sup>†</sup></i>                              | 0.017         |
| 25 | 13,523,513 | <i>rs134250904*</i> | additive<br>dominant | 8.65 X 10 <sup>-12</sup><br>1.14 X 10 <sup>-12</sup> | <i>PARN<sup>†</sup></i>                               | 0.018         |
| 25 | 37,064,123 | <i>rs134623086</i>  | dominant             | 1.70 X 10 <sup>-8</sup>                              | <i>LOC101904303<sup>†</sup></i>                       | 0.016         |
| 25 | 39,833,041 | <i>rs135726605</i>  | dominant             | 4.15 X 10 <sup>-8</sup>                              | <i>FOKK1</i><br><i>LOC101907846</i><br><i>MIR2890</i> | 0.016         |



|    |            |                                 |                      |                                                      |                                                                                               |               |
|----|------------|---------------------------------|----------------------|------------------------------------------------------|-----------------------------------------------------------------------------------------------|---------------|
| 25 | 39,846,521 | <i>rs109120989</i>              | additive<br>dominant | 4.59 X 10 <sup>-8</sup><br>6.09 X 10 <sup>-11</sup>  | <i>FO XK1</i><br><i>LOC1019078</i><br>46                                                      | 0.016         |
| 25 | 40,432,330 | <i>rs134578134</i>              | additive<br>dominant | 1.59 X 10 <sup>-8</sup><br>1.49 X 10 <sup>-8</sup>   | <i>SDK1</i> <sup>†</sup>                                                                      | 0.018         |
| 25 | 41,899,146 | <i>rs135389213</i>              | additive<br>dominant | 1.45 X 10 <sup>-8</sup><br>2.61 X 10 <sup>-11</sup>  | <i>ELFN1</i>                                                                                  | 0.018 0.018   |
| 25 | 42,786,653 | <i>rs110821072</i>              | dominant             | 2.19 X 10 <sup>-10</sup>                             | <i>LOC516442</i>                                                                              | 0.017         |
| 26 | 7,709,388  | <i>rs133146678</i>              | dominant             | 2.29 X 10 <sup>-12</sup>                             | <i>PRKG1</i> <sup>†</sup>                                                                     | 0.017         |
| 26 | 20,714,265 | <i>rs42086190</i>               | additive<br>dominant | 6.63 X 10 <sup>-11</sup><br>6.34 X 10 <sup>-12</sup> | <i>DNMBP</i> <sup>†</sup>                                                                     | 0.019<br>0.02 |
| 26 | 25,939,265 | <i>rs134817582</i> <sup>*</sup> | dominant             | 5.98 X 10 <sup>-10</sup>                             | <i>SORCS3</i><br><i>TUBGCP2</i><br><i>ZNF511</i>                                              | 0.017 0.019   |
| 26 | 26,128,319 | <i>rs42093370</i> <sup>*</sup>  | dominant             | 1.61 X 10 <sup>-10</sup>                             | <i>SORCS3</i> <sup>†</sup>                                                                    | 0.019         |
| 26 | 28,800,534 | <i>rs42434955</i>               | dominant             | 8.90 X 10 <sup>-10</sup>                             |                                                                                               | 0.021         |
| 26 | 31,743,621 | <i>rs110951772</i>              | additive<br>dominant | 6.26 X 10 <sup>-13</sup><br>1.18 X 10 <sup>-13</sup> | <i>BBIP1</i><br><i>MIR4680</i><br><i>MIR6524</i><br><i>PDCD4</i> <sup>†</sup><br><i>SHOC2</i> | 0.018         |
| 26 | 33,257,060 | <i>rs42095933</i> <sup>*</sup>  | additive<br>dominant | 4.92 X 10 <sup>-9</sup><br>1.01 X 10 <sup>-14</sup>  | <i>VTI1A</i> <sup>†</sup><br><i>ZDHHC6</i>                                                    | 0.017         |
| 26 | 34,964,906 | <i>rs110589571</i>              | dominant             | 1.56 X 10 <sup>-9</sup>                              | <i>TDRD1</i> <sup>†</sup>                                                                     | 0.017         |
| 26 | 39,381,158 | <i>rs109525251</i>              | dominant             | 2.30 X 10 <sup>-9</sup>                              |                                                                                               | 0.016         |
| 26 | 41,354,357 | <i>rs136057362</i>              | dominant             | 2.47 X 10 <sup>-9</sup>                              | <i>LOC1019072</i><br>08 <sup>†</sup>                                                          | 0.018         |
| 26 | 44,878,817 | <i>rs109485638</i>              | dominant             | 3.40 X 10 <sup>-11</sup>                             | <i>ZRANB1</i> <sup>†</sup>                                                                    | 0.018         |
| 26 | 51,272,203 | <i>rs134028089</i> <sup>*</sup> | dominant             | 8.92 X 10 <sup>-9</sup>                              |                                                                                               | 0.019         |
| 27 | 7,688,299  | <i>rs42439113</i>               | dominant             | 2.33 X 10 <sup>-9</sup>                              | <i>AGA</i><br><i>LOC1019041</i><br>57                                                         | 0.042 0.042   |
| 27 | 18,164,172 | <i>rs109143919</i>              | dominant             | 6.67 X 10 <sup>-10</sup>                             |                                                                                               | 0.02          |
| 27 | 18,991,970 | <i>rs109928360</i>              | additive<br>dominant | 4.12 X 10 <sup>-13</sup><br>2.02 X 10 <sup>-13</sup> | <i>LOC1071319</i><br>05<br><i>MTMR7</i> <sup>†</sup> <i>TR</i><br><i>NAE-UUC</i>              | 0.024         |

|    |            |                                 |                       |                                                      |                                                                    |               |
|----|------------|---------------------------------|-----------------------|------------------------------------------------------|--------------------------------------------------------------------|---------------|
| 27 | 21,083,026 | <i>rs110750240</i>              | dominant              | 1.59 X 10 <sup>-12</sup>                             |                                                                    | 0.019 0.031   |
| 27 | 21,375,791 | <i>rs132728892</i>              | additive<br>dominant  | 2.90 X 10 <sup>-32</sup><br>2.90 X 10 <sup>-32</sup> |                                                                    | 0.021         |
| 27 | 31,015,838 | <i>rs109557135</i>              | additive<br>recessive | 5.18 X 10 <sup>-9</sup><br>2.30 X 10 <sup>-8</sup>   | <i>UNC5D</i> <sup>†</sup>                                          | 0.019         |
| 27 | 32,796,736 | <i>rs134233957</i>              | dominant              | 4.47 X 10 <sup>-10</sup>                             | <i>LOC107131169</i> <sup>†</sup>                                   | 0.021 0.032   |
| 28 | 6,330,810  | <i>rs135488223</i>              | dominant              | 6.80 X 10 <sup>-12</sup>                             |                                                                    | 0.016         |
| 28 | 18,029,952 | <i>rs42340394</i>               | recessive             | 4.86 X 10 <sup>-8</sup>                              | <i>ARID5B</i> <sup>†</sup>                                         | 0.017         |
| 28 | 22,005,009 | <i>rs110596728</i> <sup>*</sup> | dominant              | 2.34 X 10 <sup>-12</sup>                             |                                                                    | 0.017         |
| 28 | 26,156,918 | <i>rs42146109</i>               | additive<br>dominant  | 9.66 X 10 <sup>-12</sup><br>1.28 X 10 <sup>-12</sup> |                                                                    | 0.016 0.025   |
| 28 | 26,832,602 | <i>rs133727040</i>              | recessive             | 7.03 X 10 <sup>-9</sup>                              |                                                                    | 0.022         |
| 28 | 27,785,987 | <i>rs109367560</i>              | additive<br>dominant  | 5.48 X 10 <sup>-9</sup><br>4.75 X 10 <sup>-12</sup>  | <i>CDH23</i> <sup>†</sup>                                          | 0.018         |
| 28 | 29,116,183 | <i>rs136830696</i>              | additive<br>dominant  | 1.48 X 10 <sup>-9</sup><br>3.57 X 10 <sup>-12</sup>  | <i>LOC101904940</i><br><i>OIT3</i><br><i>PLA2G12B</i> <sup>†</sup> | 0.017         |
| 28 | 30,040,605 | <i>rs135182095</i>              | additive<br>dominant  | 4.49 X 10 <sup>-9</sup><br>2.45 X 10 <sup>-12</sup>  | <i>VCL</i>                                                         | 0.017         |
| 28 | 31,582,482 | <i>rs109038837</i>              | additive<br>recessive | 5.28 X 10 <sup>-11</sup><br>1.45 X 10 <sup>-8</sup>  |                                                                    | 0.022 0.022   |
| 28 | 34,036,966 | <i>rs110807315</i>              | additive<br>dominant  | 2.09 X 10 <sup>-8</sup><br>1.10 X 10 <sup>-9</sup>   |                                                                    | 0.023 0.033   |
| 28 | 34,346,919 | <i>rs110585405</i>              | additive<br>dominant  | 2.65 X 10 <sup>-8</sup><br>2.14 X 10 <sup>-12</sup>  |                                                                    | 0.017 0.029   |
| 29 | 7,701,671  | <i>rs135056480</i>              | dominant              | 1.01 X 10 <sup>-8</sup>                              |                                                                    | 0.024         |
| 29 | 8,903,379  | <i>rs133663596</i>              | additive<br>dominant  | 1.83 X 10 <sup>-8</sup><br>4.10 X 10 <sup>-11</sup>  |                                                                    | 0.016 0.023   |
| 29 | 25,819,074 | <i>rs110160296</i>              | additive<br>dominant  | 2.70 X 10 <sup>-8</sup><br>8.39 X 10 <sup>-10</sup>  |                                                                    | 0.016<br>0.02 |
| 29 | 27,820,784 | <i>rs43170197</i> <sup>*</sup>  | dominant              | 8.24 X 10 <sup>-9</sup>                              | <i>LOC787694</i> <sup>†</sup>                                      | 0.017         |
| 29 | 31,640,269 | <i>rs42708672</i>               | additive<br>dominant  | 6.09 X 10 <sup>-10</sup><br>1.36 X 10 <sup>-8</sup>  |                                                                    | 0.021 0.02    |
| 29 | 44,722,284 | <i>rs42188587</i>               | additive<br>dominant  | 9.55 X 10 <sup>-11</sup><br>1.49 X 10 <sup>-12</sup> | <i>LOC104976284</i><br><i>SART1</i>                                | 0.016 0.021   |

|   |             |                     |                      |                                                      | <i>TSGA10IP</i> <sup>†</sup>              |             |
|---|-------------|---------------------|----------------------|------------------------------------------------------|-------------------------------------------|-------------|
| X | 989,669     | <i>rs42069602</i>   | dominant             | 1.07 X 10 <sup>-8</sup>                              | <i>LOC1019071</i><br>72 <sup>‡</sup>      | 0.019 0.028 |
| X | 4,429,526   | <i>rs136950148*</i> | dominant             | 2.19 X 10 <sup>-8</sup>                              |                                           | 0.022 0.024 |
| X | 10,845,015  | <i>rs110621747</i>  | additive<br>dominant | 2.65 X 10 <sup>-9</sup><br>9.63 X 10 <sup>-11</sup>  |                                           | 0.022       |
| X | 18,219,246  | <i>rs135060536</i>  | additive             | 3.79 X 10 <sup>-8</sup>                              | <i>PLAC1</i> <sup>†</sup>                 | 0.016       |
| X | 20,919,326  | <i>rs134105181</i>  | dominant             | 9.74 X 10 <sup>-10</sup>                             |                                           | 0.019       |
| X | 21,073,102  | <i>rs111006549</i>  | dominant             | 8.77 X 10 <sup>-9</sup>                              |                                           | 0.016 0.021 |
| X | 21,807,318  | <i>rs109220334</i>  | dominant             | 3.69 X 10 <sup>-9</sup>                              |                                           | 0.015       |
| X | 21,827,945  | <i>rs110658504</i>  | dominant             | 7.97 X 10 <sup>-11</sup>                             | <i>MAGEA11</i>                            | 0.016       |
| X | 25,871,732  | <i>rs136874728</i>  | dominant             | 1.20 X 10 <sup>-8</sup>                              |                                           | 0.026 0.026 |
| X | 45,175,649  | <i>rs134819091</i>  | additive<br>dominant | 1.77 X 10 <sup>-14</sup><br>1.77 X 10 <sup>-14</sup> |                                           | 0.017       |
| X | 52,975,251  | <i>rs134301289</i>  | dominant             | 1.25 X 10 <sup>-9</sup>                              | <i>IL1RAPL2</i> <sup>†</sup>              | 0.016       |
| X | 62,588,913  | <i>rs137706243</i>  | dominant             | 1.77 X 10 <sup>-9</sup>                              |                                           | 0.019 0.019 |
| X | 62,607,238  | <i>rs135305113</i>  | dominant             | 3.86 X 10 <sup>-8</sup>                              |                                           | 0.016       |
| X | 65,081,915  | <i>rs133502506</i>  | dominant             | 5.61 X 10 <sup>-11</sup>                             | <i>LOC1002949</i><br>35                   | 0.016       |
| X | 71,640,703  | <i>rs137807194</i>  | dominant             | 5.13 X 10 <sup>-9</sup>                              | <i>LOC1008472</i><br>20 <sup>‡</sup>      | 0.016       |
| X | 86,160,589  | <i>rs133939924</i>  | additive<br>dominant | 4.24 X 10 <sup>-13</sup><br>4.24 X 10 <sup>-13</sup> | <i>FAM155B</i><br><i>LOC1049705</i><br>34 | 0.016       |
| X | 90,518,686  | <i>rs134541035*</i> | additive<br>dominant | 4.26 X 10 <sup>-9</sup><br>1.70 X 10 <sup>-11</sup>  | <i>RP2</i> <sup>†</sup>                   | 0.018 0.023 |
| X | 101,652,487 | <i>rs135383970</i>  | dominant             | 5.37 X 10 <sup>-10</sup>                             | <i>ARHGEF9</i> <sup>†</sup>               | 0.016       |
| X | 128,845,516 | <i>rs110577907</i>  | additive<br>dominant | 2.51 X 10 <sup>-10</sup><br>9.07 X 10 <sup>-11</sup> |                                           | 0.018 0.028 |
| X | 140,922,740 | <i>rs132731146</i>  | dominant             | 1.69 X 10 <sup>-8</sup>                              |                                           | 0.015       |
| X | 141,674,669 | <i>rs137273223</i>  | dominant             | 7.45 X 10 <sup>-9</sup>                              |                                           | 0.021 0.022 |

<sup>†</sup>Chromosome location of the locus

<sup>‡</sup>SNP location as measured by numbered nucleotides in reference to the UMD 3.1 genome assembly (<http://bovinegenome.org/?q=node/61>)

<sup>3</sup>The *rs* number is the assigned SNP identity from the National Center for Biotechnology Information SNP database (<https://www.ncbi.nlm.nih.gov/projects/SNP/>; accessed 2 April 2018). <sup>4</sup>SNP located within previously identified copy number variations (CNVs) are denoted with an \*.

<sup>5</sup>Genome-wide association analysis model.

<sup>6</sup>The most significant SNP in the locus associated with heifer conception rate is listed.

<sup>7</sup>Positional candidate gene(s) within +/- 19 kb of the associated SNP(s).

<sup>†</sup> Genes with SNPs identified within their coding sequence

<sup>8</sup>Contribution of each SNP to the total variance

**Supplementary Table 3.** Loci Associated with Conception Rate at First Breeding (HCR1) and The Number of Times Bred to Achieve Pregnancy (TBRD) that Contained Transcription Factor Binding Sites.

| SNP ID <sup>1</sup> | BTA: BP position <sup>2</sup> | Transcription Factor(s) <sup>3</sup> | Transcription Binding Factor Site <sup>4</sup> | RE Query <sup>5</sup> |
|---------------------|-------------------------------|--------------------------------------|------------------------------------------------|-----------------------|
| <i>rs110647268</i>  | 1:11,250,683                  | Nrf2:MafK                            | TTT[T/C]TGA                                    | 0.01724               |
| <i>rs109447046</i>  | 1:11,812,309                  | GR                                   | AGA[A/C]CT                                     | 0.00892               |
| <i>rs43224096</i>   | 1:29,618,772                  | HOXA5                                | [A/G]TTAG                                      | 0.04584               |
| <i>rs136512158</i>  | 1:36,710,870                  | RXR-alpha                            | GG[T/G]TCA                                     | 0.00629               |
| <i>rs110503664</i>  | 1:50,071,525                  | CP2                                  | [T/C]TGGGAAG                                   | 0.00105               |
| <i>rs109491771</i>  | 1:52,895,536                  | JunD                                 | CT[G/T]GAC                                     | 0.00863               |
|                     |                               | c-Jun                                | [G/T]GACTT                                     | 0.01409               |
|                     |                               | JunB                                 | [G/T]GACTT                                     | 0.01006               |
| <i>rs42282809</i>   | 1:108,986,133                 | C/EBPalpha                           | GAGCA[C/A]                                     | 0.00813               |
| <i>rs110884711</i>  | 1:122,822,402                 | C/EBPalpha                           | GAGCA[A/G]                                     | 0.00813               |
| <i>rs136894301</i>  | 1:129,836,154                 | HNF-1C                               | G[C/A]AATTT                                    | 0.01529               |
| <i>rs136888926</i>  | 1:157,576,622                 | Nkx2-1                               | CCTC[C/A]AG                                    | 0.002                 |
|                     |                               | Nkx2-1                               | CTC[C/A]AG                                     | 0.00688               |
|                     |                               | IRF-2                                | [C/A]AGTGA                                     | 0.00791               |
| <i>rs109028820</i>  | 2:6,611,760                   | TCF-4E                               | CT[G/T]TGCT                                    | 0.00114               |
| <i>rs137188435</i>  | 2:26,960,403                  | HNF-4alpha1                          | ACCTT[T/G]G                                    | 0.00566               |
| <i>rs42416884</i>   | 2:55,050,085                  | IRF-2                                | [T/G]CACTT                                     | 0.01135               |
| <i>rs42354740</i>   | 2:58,258,750                  | HNF-3beta                            | CC[A/C]AACA                                    | 0.00664               |
| <i>rs133761371</i>  | 2:65,451,280                  | CREMtau                              | [A/G]GCTGCTG                                   | 0.01929               |
|                     |                               | CREMtaualpha                         | [A/G]GCTGCTG                                   | 0.01929               |
|                     |                               | CREMtau1                             | [A/G]GCTGCTG                                   | 0.01929               |
|                     |                               | CREMtau2                             | [A/G]GCTGCTG                                   | 0.01929               |
| <i>rs109322207</i>  | 2:65,493,191                  | C/EBPalpha                           | [C/A]TTT                                       | 0.03071               |
|                     |                               | YY1                                  | CC[C/A]TTT                                     | 0.00334               |
| <i>rs109342415</i>  | 2:85,462,609                  | C/EBPalpha                           | T[T/G]GCTC                                     | 0.00609               |
|                     |                               | DBP                                  | GTT[T/G]GCT                                    | 0.00818               |
| <i>rs109065091</i>  | 2:94,405,242                  | PRA                                  | AA[A/C]AGTA                                    | 0.00277               |
|                     |                               | PRB                                  | AA[A/C]AGTA                                    | 0.00277               |
| <i>rs135949924</i>  | 3:13,676,438                  | GR-alpha                             | CT[T/G]T                                       | 0.03563               |
| <i>rs43336503</i>   | 3:32,269,604                  | c-Jun                                | A[C/A]GTCA                                     | 0.01197               |
|                     |                               | JunB                                 | A[C/A]GTCA                                     | 0.00583               |
| <i>rs111017447</i>  | 3:35,996,083                  | HNF-1C                               | [T/G]CAATTT                                    | 0.01469               |

|                    |               |                          |               |         |
|--------------------|---------------|--------------------------|---------------|---------|
| <i>rs137663076</i> | 3:37,781,561  | HOXA5                    | [G/A]TTAG     | 0.03929 |
| <i>rs137736954</i> | 4:6,502,615   | HNF-3beta                | CCAA[A/C]CA   | 0.00609 |
| <i>rs133821212</i> | 4:78,821,054  | TCF-4E                   | AGCAA[C/A]G   | 0.00207 |
| <i>rs135524891</i> | 4:98,336,209  | HNF-3beta                | TGTT[G/T]TG   | 0.02236 |
| <i>rs136974031</i> | 4:118,420,186 | CACCC-<br>binding factor | GGGTGG[A/G]G  | 0.00097 |
| <i>rs109300805</i> | 5:76,167,701  | CP2                      | CT[A/G]CCCAG  | 0.00101 |
| <i>rs137120693</i> | 5:88,633,335  | IRF-2                    | A[C/A]GTGA    | 0.013   |
| <i>rs134948194</i> | 6:48,243,519  | NF-1/L                   | TGC[C/A]A     | 0.01754 |
| <i>rs42919834</i>  | 6:107,302,731 | Nkx2-1                   | CTCA[A/C]G    | 0.00724 |
| <i>rs109630077</i> | 6:114,510,383 | NF-AT1                   | GG[A/C]AAAAT  | 0.00384 |
| <i>rs135802025</i> | 6:118,987,625 | AREB6                    | CGTCACC[G/A]G | 0.00027 |
| <i>rs109079807</i> | 7:20,209,433  | Nkx2-1                   | CCTCC[A/C]G   | 0.00207 |
| <i>rs134893796</i> | 7:62,311,969  | GR-alpha                 | A[C/A]AG      | 0.08553 |
| <i>rs43518018</i>  | 7:63,352,489  | Nkx2-1                   | C[C/T]TGAG    | 0.0014  |
| <i>rs43519903</i>  | 7:64,472,010  | HNF-3beta                | CAAAAC[A/C]   | 0.00804 |
| <i>rs134217351</i> | 7:66,177,154  | c-Jun                    | TGAC[G/T]T    | 0.01514 |
|                    |               | JunB                     | TGAC[G/T]T    | 0.00757 |
| <i>rs43531491</i>  | 7:106,968,546 | C/EBPbeta                | A[C/A]ATT     | 0.04932 |
| <i>rs132834691</i> | 7:108,044,827 | C/EBPbeta                | AA[T/C]GT     | 0.07704 |
| <i>rs110390603</i> | 8:2,353,560   | RXR-alpha                | TGAAC[A/C]    | 0.0053  |
| <i>rs133541436</i> | 8:28,583,167  | POU1F1b                  | [A/C]CAATTAT  | 0.01316 |
|                    |               | POU1F1c                  | [A/C]CAATTAT  | 0.01316 |
| <i>rs133191466</i> | 8:72,863,847  | IRF-2                    | TCAC[T/G]T    | 0.01847 |
| <i>rs110821231</i> | 9:52,338,179  | Pax-5                    | GG[G/A]CTTG   | 0.02727 |
| <i>rs110831114</i> | 9:52,354,187  | POU2F1                   | CTCA[T/C]T    | 0.03177 |
| <i>rs110029213</i> | 9:52,360,536  | POU2F1                   | A[G/A]TAAG    | 0.03004 |
| <i>rs110381341</i> | 10:7,193,076  | c-Ets-1                  | CAG[G/T]AAG   | 0.00101 |
| <i>rs110325782</i> | 10:29,865,159 | WT1I'-KTS                | C[T/C]CCCTC   | 0.01539 |
| <i>rs109807092</i> | 11:35,881,102 | RXR-alpha                | TGAA[A/C]C    | 0.00662 |
| <i>rs110204195</i> | 11:50,339,491 | WT1I                     | CACACA[C/T]   | 0.00308 |
| <i>rs43681043</i>  | 11:50,428,456 | POU2F1                   | AATA[A/G]G    | 0.05191 |
| <i>rs110930462</i> | 11:96,474,351 | PRB                      | AACA[G/C]TG   | 0.00683 |
|                    |               | PRA                      | AACA[G/C]TG   | 0.00683 |
| <i>rs133031236</i> | 12:36,866,277 | RXR-alpha                | TGAAC[C/T]    | 0.00334 |
|                    |               | FOXP3                    | [C/T]TAAATTTT | 0.00777 |
| <i>rs133296292</i> | 12:43,939,457 | GATA-1                   | CAG[G/A]TA    | 0.00916 |

|                    |               |              |                    |         |
|--------------------|---------------|--------------|--------------------|---------|
| <i>rs110718934</i> | 12:58,518,230 | STAT4        | [G/T]GAAAT         | 0.01312 |
| <i>rs43711088</i>  | 13:1,247,948  | GR           | AGT[C/T]CT         | 0.00869 |
| <i>rs41676079</i>  | 13:2,264,173  | CREMtau      | CTG[C/A]AGC        | 0.02894 |
|                    |               | CREMtaualpha | CTG[C/A]AGC        | 0.02894 |
|                    |               | CREMtau1     | CTG[C/A]AGC        | 0.02894 |
|                    |               | CREMtau2     | CTG[C/A]AGC        | 0.02894 |
| <i>rs41566209</i>  | 13:57,799,152 | HNF-3beta    | [C/A]CAAACA        | 0.04406 |
|                    |               | FOXO4        | AGAAA[C/A]CAAACAAA | 0.00031 |
|                    |               | FOXM1b       | AAA[C/A]CAAACAAA   | 0.00322 |
|                    |               | FOXM1a       | AAA[C/A]CAAACAAA   | 0.00322 |
|                    |               | FOXJ1        | AAA[C/A]CAAACAAA   | 0.00208 |
|                    |               | HNF-3alpha   | A[C/A]CAAACA       | 0.01861 |
|                    |               | HNF-3beta    | A[C/A]CAAACA       | 0.01861 |
| <i>rs110288957</i> | 14:2,198,215  | Nkx2-1       | CCTCC[G/A]G        | 0.00386 |
| <i>rs41839430</i>  | 14:17,291,481 | TBP          | T[T/G]TATATA       | 0.0216  |
| <i>rs135136778</i> | 14:21,358,853 | HNF-4alpha1  | ATCTTT[T/G]        | 0.00463 |
|                    |               | C/EBPalpha   | TT[T/G]CTC         | 0.0061  |
|                    |               | TCF-4E       | CTTT[T/G]CT        | 0.00192 |
| <i>rs132864771</i> | 14:58,333,285 | YY1          | AAATG[G/T]         | 0.00796 |
|                    |               | C/EBPbeta    | AATG[G/T]          | 0.06876 |
| <i>rs41662040</i>  | 15:5,208,201  | HNF-1C       | [T/G]TAATTT        | 0.00958 |
| <i>rs135148389</i> | 15:15,473,841 | NF-1/L       | TG[A/G]CA          | 0.03093 |
| <i>rs41596221</i>  | 15:22,458,768 | GATA-2       | GATA[C/A]AAG       | 0.00144 |
| <i>rs137402563</i> | 15:55,552,388 | TFIID        | T[C/T]TAAAA        | 0.021   |
|                    |               | TFIID        | TTT[C/T]TAA        | 0.03051 |
|                    |               | TFIID        | TT[C/T]TAAA        | 0.03051 |
|                    |               | TFIID        | T[C/T]TAAAA        | 0.03051 |
| <i>rs109416226</i> | 15:61,669,862 | LF-A1        | T[C/G]CCCTG        | 0.00379 |
| <i>rs134711585</i> | 16:15,481,171 | Elk-1        | [C/A]AACTTCCT      | 0.00019 |
| <i>rs133881641</i> | 16:16,473,798 | CREMtau      | CATC[C/A]GC        | 0.00648 |
|                    |               | CREMtaualpha | CATC[C/A]GC        | 0.00648 |
|                    |               | CREMtau1     | CATC[C/A]GC        | 0.00648 |
|                    |               | CREMtau2     | CATC[C/A]GC        | 0.00648 |
| <i>rs42936399</i>  | 16:34,026,492 | JunD         | [T/G]TCAAG         | 0.01479 |
| <i>rs134810606</i> | 16:35,683,918 | TCF-4E       | AGCAA[C/A]G        | 0.00319 |
|                    |               | IRF-2        | A[C/A]GTGA         | 0.01789 |
| <i>rs41823539</i>  | 16:72,801,288 | TFIID        | T[T/G]TTCTA        | 0.04357 |

|                    |               |              |              |         |
|--------------------|---------------|--------------|--------------|---------|
| <i>rs41639843</i>  | 17:4,755,665  | GR-alpha     | CT[G/T]T     | 0.07855 |
| <i>rs109063837</i> | 17:28,295,990 | PRB          | G[A/C]CTGTT  | 0.00635 |
|                    |               | PRA          | G[A/C]CTGTT  | 0.00635 |
| <i>rs110378748</i> | 17:40,345,468 | Fra-1        | TGACG[C/A]   | 0.01248 |
| <i>rs110610109</i> | 17:46,125,255 | GR-alpha     | AC[A/C]G     | 0.04788 |
| <i>rs41844776</i>  | 17:47,203,601 | HNF-3beta    | T[G/T]TTTTG  | 0.005   |
| <i>rs132676005</i> | 18:21,080,949 | c-Jun        | TGAC[G/T]C   | 0.01441 |
|                    |               | c-Jun        | TGAC[G/T]CA  | 0.00174 |
|                    |               | TFIID        | [G/T]CAAAAA  | 0.03029 |
|                    |               | c-Fos        | TGAC[G/T]CA  | 0.00174 |
| <i>rs41888920</i>  | 18:55,406,165 | CREMtau      | CAGCAG[A/C]  | 0.02894 |
|                    |               | CREMtau      | G[A/C]TGCAG  | 0.02894 |
|                    |               | CREMtau      | [A/C]TGCAGC  | 0.02894 |
|                    |               | CREMtaualpha | CAGCAG[A/C]  | 0.02894 |
|                    |               | CREMtaualpha | G[A/C]TGCAG  | 0.02894 |
|                    |               | CREMtaualpha | [A/C]TGCAGC  | 0.02894 |
|                    |               | CREMtau1     | CAGCAG[A/C]  | 0.02894 |
|                    |               | CREMtau1     | G[A/C]TGCAG  | 0.02894 |
|                    |               | CREMtau1     | [A/C]TGCAGC  | 0.02894 |
|                    |               | CREMtau2     | CAGCAG[A/C]  | 0.02894 |
|                    |               | CREMtau2     | G[A/C]TGCAG  | 0.02894 |
|                    |               | CREMtau2     | [A/C]TGCAGC  | 0.02894 |
| <i>rs109045973</i> | 18:62,610,581 | STAT4        | GG[A/C]AAT   | 0.00942 |
|                    |               | HNF-1C       | G[A/C]AATTT  | 0.00428 |
| <i>rs135740624</i> | 19:8,755,982  | Sp1          | GGG[T/C]GG   | 0.02603 |
| <i>rs137270020</i> | 19:24,125,771 | T3R-beta     | [G/A]GTCACT  | 0.00102 |
| <i>rs133431883</i> | 19:36,603,139 | HNF-3alpha   | AA[A/C]AAACA | 0.01047 |
|                    |               | HNF-3beta    | AA[A/C]AAACA | 0.01047 |
| <i>rs110291598</i> | 19:53,443,757 | NF-1/L       | [T/C]GGCA    | 0.03118 |
| <i>rs133688167</i> | 20:11,320,893 | TFIID        | [G/T]TTTTTA  | 0.07254 |
| <i>rs133727040</i> | 20:26,832,602 | c-Ets-2      | T[T/C]CCTC   | 0.00886 |
| <i>rs133442114</i> | 20:28,255,221 | HNF-1C       | [T/G]TAATTT  | 0.01107 |
| <i>rs110981497</i> | 20:66,175,689 | HNF-3beta    | CCAAA[A/C]A  | 0.00216 |
| <i>rs41960759</i>  | 20:66,434,683 | TFIID        | TTT[G/T]TGA  | 0.04048 |
| <i>rs133287618</i> | 21:21,479,311 | GR-alpha     | [T/C]TGT     | 0.0621  |
|                    |               | PRB          | CA[T/C]TGTT  | 0.00403 |
|                    |               | PRA          | CA[T/C]TGTT  | 0.00403 |



|                    |               |             |               |         |
|--------------------|---------------|-------------|---------------|---------|
| <i>rs134241191</i> | 22:6,613,617  | HNF-3beta   | [A/C]CAAACA   | 0.01566 |
| <i>rs135795816</i> | 22:39,159,742 | Elk-1       | CTTCCG[C/T]   | 0.02511 |
| <i>rs109398421</i> | 22:48,562,499 | IRF-1       | AAAG[G/T]GAAA | 0.00104 |
| <i>rs135600509</i> | 23:11,601,873 | AP-2alphaA  | [A/C]GGGG     | 0.04838 |
| <i>rs133879598</i> | 23:40,664,436 | NFI/CTF     | CCA[A/C]ACGT  | 0.00495 |
|                    |               | c-Myc       | [A/C]ACGTG    | 0.00793 |
|                    |               | USF1        | [A/C]ACGTGAC  | 0.00047 |
| <i>rs136686460</i> | 23:42,391,390 | CP2         | CT[G/T]GGAAG  | 0.00117 |
| <i>rs109518863</i> | 23:47,335,140 | HNF-4alpha1 | [A/C]AAAGAT   | 0.00192 |
| <i>rs135250622</i> | 24:6,866,479  | GR          | AG[T/G]TCT    | 0.00893 |
| <i>rs135529640</i> | 24:34,221,005 | c-Ets-2     | G[A/C]GGAA    | 0.01546 |
| <i>rs136377593</i> | 24:37,585,202 | CREMtau1    | [A/C]AGCAGC   | 0.02092 |
|                    |               | CREMtau2    | [A/C]AGCAGC   | 0.02092 |
| <i>rs134250904</i> | 25:13,523,513 | WT1I        | CACACA[A/C]   | 0.02768 |
| <i>rs135389213</i> | 25:41,899,146 | HES-1       | G[T/C]GCGTG   | 0.01367 |
| <i>rs42293525</i>  | 26:13,829,714 | NF-1/L      | T[G/A]GCA     | 0.02128 |
| <i>rs109525251</i> | 26:39,381,158 | AhR         | G[C/A]GTGAG   | 0.00172 |
|                    |               | BTEB4       | GCC[C/A]GCCCC | 0.03461 |
| <i>rs42146109</i>  | 28:26,156,918 | C/EBPalpha  | GAG[C/A]AA    | 0.00787 |
| <i>rs109038837</i> | 28:31,582,482 | C/EBPalpha  | TT[A/G]       | 0.49948 |
|                    |               | C/EBPbeta   | TT[A/G]       | 0.49948 |
|                    |               | Nkx2-1      | CTT[A/G]AG    | 0.00671 |
| <i>rs42188587</i>  | 29:44,722,284 | POU1F1c     | ATAATTT[G/T]  | 0.01828 |
| <i>rs42069602</i>  | X:989,669     | GR          | AG[T/G]TCT    | 0.00895 |
| <i>rs136874728</i> | X:25,871,732  | c-Jun       | TGAC[T/G]T    | 0.00991 |
|                    |               | JunB        | TGAC[T/G]T    | 0.00815 |
| <i>rs134819091</i> | X:45,175,649  | RXR-alpha   | [C/T]GAACC    | 0.00477 |
| <i>rs133939924</i> | X:86,160,589  | Fra-1       | TG[A/C]CGC    | 0.01301 |

<sup>1</sup>The most significant SNP in the locus associated with HCR or TBRD is listed. The *rs* number is the assigned SNP identity from the National Center for Biotechnology Information SNP database (<https://www.ncbi.nlm.nih.gov/projects/SNP/>; accessed 2 April 2018).

<sup>2</sup>Single nucleotide polymorphism (SNP) location on the *Bos taurus* (BTA) chromosome is followed by the nucleotide location in base pairs (bp) as measured by numbered nucleotides in reference to the UMD 3.1 genome assembly (<http://bovinegenome.org/?q=node/61>).

<sup>3</sup>Gene symbol for the transcription factors whose binding sites spanned the locus.

<sup>4</sup>Binding site for the transcription factor, with the SNP alleles in brackets. Bolded alleles are associated with the TFBS.

<sup>5</sup>RE Query: Random Expectation query – test statistic evaluating probability of TFBS being within a specific DNA sequence

**Supplementary Table 4.** Upstream Regulators and their Targets Identified in the Ingenuity Pathway Analysis for Heifer Conception Rate.

| <b>Upstream Regulators<sup>1</sup></b> | <b>Molecule Type<sup>2</sup></b>    | <b>p-value<sup>3</sup></b> | <b>Gene Targets of the Upstream Regulator<sup>4</sup></b>                                                                                                                                                   |
|----------------------------------------|-------------------------------------|----------------------------|-------------------------------------------------------------------------------------------------------------------------------------------------------------------------------------------------------------|
| Calcium                                | chemical<br>endogenous<br>mammalian | 4.17 × 10 <sup>-8</sup>    | <i>AHR, ANKH, ATF3, CALR, CD80, CEBPB, COMMD5, CREM, DBP, ELK1, FOS, FOSL1, ICAM1, IRF1, JUN, JUNB, JUND, KCND2, NFATC2, NTRK2, SELP, STC1</i>                                                              |
| MT2                                    | other                               | 2.08 × 10 <sup>-7</sup>    | <i>ATF3, CEBPA, ETS2, FOS, JUN, LEP, MYC</i>                                                                                                                                                                |
| LIF                                    | cytokine                            | 5.12 × 10 <sup>-7</sup>    | <i>ANKRD40, CEBPB, ERAP1, FOS, FOXA2, FOXP3, GATA1, HES1, IRF1, JUN, JUNB, LARGE1, LEP, MYC, PGR, RPE65, WT1, ZFP57</i>                                                                                     |
| MT1                                    | other                               | 5.55 × 10 <sup>-7</sup>    | <i>ATF3, CEBPA, ETS2, FOS, JUN, LEP, MYC</i>                                                                                                                                                                |
| EGF                                    | growth factor                       | 1.13 × 10 <sup>-6</sup>    | <i>ATF3, CEBPB, CREM, ELK1, ETS1, ETS2, FOS, FOSL1, FOXA2, FOXJ1, FSCN2, GATA2, HES1, HNF4A, ICAM1, IL1R2, JUN, JUNB, JUND, MYC, PDCD4, PGR, RXRA, SP1, TBP, TFAP2A, TRPM7, VCL, ZEB1</i>                   |
| FOS                                    | transcription<br>regulator          | 1.49 × 10 <sup>-6</sup>    | <i>ACTG1, ATF3, BCAR3, CAMK2D, CAST, CLIP1, FMN1, FOS, FOSL1, FOXA1, GRIK2, ICAM1, JUN, JUNB, LARGE1, MYC, NR3C1, PGR, PRDM1, PSMA2, PTPRD, QKI, RBP1, RXRA, SDK1, SEMA3E, SMARCD2, ST8SIA5, UTRN, ZEB1</i> |
| FLT3LG                                 | cytokine                            | 2.88 × 10 <sup>-6</sup>    | <i>CD80, CEBPA, CEBPB, FOXP3, GATA1, ICAM1, PAX5, RAG1, RAG2</i>                                                                                                                                            |
| LRP5                                   | transmembrane<br>receptor           | 3.24 × 10 <sup>-6</sup>    | <i>FOXA1, FOXA2, HNF1A, HNF1B, HNF4A</i>                                                                                                                                                                    |

|                                    |                               |   |                       |                                                                                                                                                                       |
|------------------------------------|-------------------------------|---|-----------------------|-----------------------------------------------------------------------------------------------------------------------------------------------------------------------|
| benzyloxycarbonyl-Leu-Leu aldehyde | chemical protease inhibitor   | - | $7.46 \times 10^{-6}$ | <i>ABL1, AHR, ATF3, CEBPA, CEBPB, ETS1, FOS, FOXM1, HNF1A, ICAM1, JUN, MYC, NEDD8, NKX2-1, NR3C1, PDCD4, PGR, PRDM1, RXRA, SCRIB</i>                                  |
| CEBPA                              | transcription regulator       |   | $9.31 \times 10^{-6}$ | <i>CEBPA, CEBPB, FOS, FOXA2, FOXM1, FTO, GATA2, HNF1A, HNF1B, ICAM1, JUN, JUNB, LEP, MYC, NFATC2, PAX5, PRDM1, QKI, RAG1, SEMA3E, TFAP2A, TGFB2, THRB, TIAM1, VCL</i> |
| acetic acid                        | chemical endogenous mammalian | - | $1.20 \times 10^{-5}$ | <i>FOS, JUN, JUNB, LEP</i>                                                                                                                                            |
| Integrin                           | complex                       |   | $1.37 \times 10^{-5}$ | <i>AHR, FOS, JUN, MYC, TGFB2</i>                                                                                                                                      |
| TAF6                               | transcription regulator       |   | $1.99 \times 10^{-5}$ | <i>ATF3, BCL11B, HES1, IRF1, JUN, TBP</i>                                                                                                                             |

<sup>1</sup>Upstream regulators are molecules that control multiple genes in the Ingenuity Pathway Analysis through direct or indirect relationships

<sup>2</sup>Molecule type of the regulator as defined by the Ingenuity Pathway Analysis

<sup>3</sup>P-value with Bonferroni correction ( $p < 1.25 \times 10^{-5}$ )

<sup>4</sup>Gene targets of the up stream regulators from the positional candidate genes and transcription binding factor sites identified in the genome-wide association and Transfac analysis

**Supplementary Table 5.** Master Regulators and their Targets Identified in the Ingenuity Pathway Analysis for Heifer Conception Rate.

| <b>Master Regulators<sup>1</sup></b> | <b>Molecule Type<sup>2</sup></b>      | <b>p-value<sup>3</sup></b> | <b>Master Regulator Gene Targets<sup>4</sup></b>                                                                                                                                                                                                                                                                                                                                                                                                                                                                                                       |
|--------------------------------------|---------------------------------------|----------------------------|--------------------------------------------------------------------------------------------------------------------------------------------------------------------------------------------------------------------------------------------------------------------------------------------------------------------------------------------------------------------------------------------------------------------------------------------------------------------------------------------------------------------------------------------------------|
| cannabinol                           | chemical -<br>endogenous<br>mammalian | 2.01 × 10 <sup>-9</sup>    | <i>ACTG1, AFAP1, ATF1, ATF3, ATXN1, CAST, CD276, CD46, CEBPA, CEBPB, CIT, CLEC7A, CREM, ETS1, ETS2, FOS, FOSL1, FOXA1, FOXA2, FOXM1, FOXP3, GADD45GIP1, GATA1, GLCCI1, GNAQ, GRIK2, HES1, HNF1A, HNF1B, ICAM1, ICAM5, IL1R2, JUN, JUNB, JUND, KCND2, KIR3DL1, LCP1, LEP, MDGA1, MIGA1, MYC, NFATC2, NKX21, NR3C1, PAX5, PDCD4, PGR, PPP6C, PRDM1, PRKG1, PSMA2, PTPRS, QKI, RAB10, RAG2, RASGRF1, RBP1, ROBO1, SELP, SEMA3E, SEMA4A, SMARCD2, SNTB1, SORCS3, ST8SIA5, STC1, SV2C, TBP, TGFB2, TIAM1, TICRR, TNFRSF8, UTRN, WT1, WWOX, ZEB1, ZNF148</i> |
| RGS1                                 | other                                 | 1.70 × 10 <sup>-8</sup>    | <i>ATF6, CD46, CD80, CEBPB, CLEC7A, DBP, ETS1, FOS, HES1, HNF4A, ICAM1, ICAM3, JUN, JUNB, JUND, LEP, MYC, NR3C1, POU1F1, RBP1, RXRA, SELP, TBP, TGFB2</i>                                                                                                                                                                                                                                                                                                                                                                                              |
| WWC1                                 | transcription<br>regulator            | 1.74 × 10 <sup>-8</sup>    | <i>ABCA4, ACER1, ACTG1, ALDH4A1, APBB2, ARHGEF9, ATF1, ATF3, ATP6V0D2, ATP6V1H, ATXN1, BCAR3, BCL11B, BRF2, CAMK2D, CAST, CD46, CDC42BPB, CEBPA, CEBPB, CHI3L2, CHMP4A, CIT, CLEC7A, CNOT4, CNTNAP2, COL14A1, DAB1, DGKI, EIF2B1, EPB41L5, EPHA3, ETS2, EYA4, FAM171A1, FEM1B, FHIT, FMN1, FOXA2, FOXJ1, FOXO4, FOXP3, GABRA1, GATA1, GATA2, GBX1, GGCT, GH1, GNAI2, GNAQ, GRIK2, HNF1A, HNF4A, ICAM1, ICAM3, ICAM5, IQGAP1, IRF1, IVNS1ABP, JUN, JUNB, JUND, KCND2, KPNA3, LCP1, LEP, LRP2, MAP3K3, MDGA1, MFAP3, MIGA1,</i>                          |

|           |        |                         |                                                                                                                                                                                                                                                                                                                                                                                                                                                                                                                                  |
|-----------|--------|-------------------------|----------------------------------------------------------------------------------------------------------------------------------------------------------------------------------------------------------------------------------------------------------------------------------------------------------------------------------------------------------------------------------------------------------------------------------------------------------------------------------------------------------------------------------|
|           |        |                         | <i>MIOX, MOG, MYC, NEDD8, NEK1, NFATC2, NLGN1, NLGN4X, PAFAH1B1, PAICS, PDCD4, PFKP, PGR, PIK3R1, PKIA, PLAC1, PLCB1, PPAT, PRKD1, PRKG1, PRKN, PTGER3, PTPN11, QKI, RAB3C, RAD23A, RAG1, RASGRF1, RBL2, RGS12, ROBO1, RPE65, RPL8, RXRA, SCRIB, SEMA4A, SHROOM3, SORCS3, SP1, SPAG9, ST3GAL5, STAT4, STC1, SUCLG1, SV2C, TCF7L2, TFAP2A, TGFB2, THRB, TIAM1, TJP2, TMED2, TNFRSF8, TPP2, UTRN, VAMP4, WNT2, ZEB1</i>                                                                                                            |
| TNFAIP8L2 | other  | 3.33 × 10 <sup>-8</sup> | <i>ATF3, CD46, CD80, CEBPA, CEBPB, CXCL9, ELK1, FHIT, FOSL1, FOXM1, FOXO4, GATA2, HES1, HNF4A, ICAM1, JUN, JUNB, JUND, KLF15, LEP, MYC, NFATC2, PGR, PRDM1, RAG1, RBP1, RXRA, SORCS3, TBP, UTRN, WT1, ZEB1</i>                                                                                                                                                                                                                                                                                                                   |
| MT2       | other  | 4.17 × 10 <sup>-8</sup> | <i>ATF3, CEBPA, ETS2, FOS, JUN, LEP, MYC</i>                                                                                                                                                                                                                                                                                                                                                                                                                                                                                     |
| UBA3      | enzyme | 4.20 × 10 <sup>-8</sup> | <i>ABCA4, ACER1, AHR, ARHGEF9, ATP6V1H, ATXN1, CAST, CD80, CDC42BPB, CEBPA, CHMP4A, CIT, CLEC7A, CNOT4, CREM, CXCL9, DBP, ELK1, EP400, EPHA3, ERAP1, ETS2, EYA4, FMN1, FOS, FOXA1, FOXO4, FOXP3, GABRA1, GATA1, GGCT, GLCCI1, GNAQ, GRIA4, HDAC9, HES1, HIP1, HNF4A, IQGAP1, KPNA3, LEP, MAP3K3, MYO10, NEK1, NFATC2, NLGN1, NLGN4X, NR3C1, PAX5, PDCD4, PFKP, PLAC1, PLCB1, PPM1H, PRDM1, PTGER3, RAB3C, RAG2, RBL2, RBP1, ROBO1, RXRA, SELP, SP1, SPAG9, STAT4, STC1, TBP, TCF7L2, TGFB2, THRB, TJP2, TPP2, VCL, WT1, ZEB1</i> |
| CLNK      | other  | 4.83 × 10 <sup>-8</sup> | <i>ACTG1, AFAP1, AHR, ATF3, ATXN1, CD276, CD46, CD80, CEBPA, CLEC7A, ETS1, FOS, FOSL1, FOXA1, FOXA2, FOXM1, FOXP3, GADD45GIP1, GATA1, GNAQ, HNF1A,</i>                                                                                                                                                                                                                                                                                                                                                                           |

|                        |                                       |                         |                                                                                                                                                                                                                                                                                 |
|------------------------|---------------------------------------|-------------------------|---------------------------------------------------------------------------------------------------------------------------------------------------------------------------------------------------------------------------------------------------------------------------------|
|                        |                                       |                         | <i>HNF1B, HNF4A, ICAM1, ICAM5, IL1R2, IRF1, JUN, JUNB, KCND2, KIR3DL1, LCP1, LEP, MYC, NFATC2, NR3C1, PAX5, PDCD4, PGR, PPP6C, PRDM1, PSMA2, PTPRS, QKI, RAB10, RAG2, RBP1, RXRA, SELP, SEMA3E, SMARCD2, SNTB1, ST8SIA5, TGFB2, TIAM1, TICRR, TNFRSF8, UTRN, WWOX, ZNF148</i>   |
| SLC35B2                | transporter                           | 5.48 x 10 <sup>-8</sup> | <i>ATF3, CD46, CD80, CEBPA, CEBPB, CXCL9, ELK1, ETS1, FHIT, FOSL1, FOXM1, GATA2, HES1, ICAM1, JUN, JUNB, KLF15, LEP, MYC, NFATC2, PGR, PRDM1, RAG1, RBP1, SORCS3, TBP, UTRN, WT1, ZEB1</i>                                                                                      |
| decanoic acid          | chemical -<br>endogenous<br>mammalian | 6.65 x 10 <sup>-8</sup> | <i>ATF3, CD46, CD80, CEBPA, CEBPB, CXCL9, ELK1, ETS1, FHIT, FOSL1, FOXM1, GATA2, HES1, ICAM1, JUN, JUNB, KLF15, LEP, MYC, NFATC2, PGR, PRDM1, RAG1, RBP1, SORCS3, TBP, UTRN, WT1, ZEB1</i>                                                                                      |
| STAM2                  | other                                 | 6.87 x 10 <sup>-8</sup> | <i>ATF3, CD46, CD80, CEBPA, CEBPB, CXCL9, ELK1, FHIT, FOSL1, FOXM1, GATA2, HES1, HNF4A, ICAM1, JUN, JUNB, JUND, KLF15, LEP, MYC, NFATC2, PGR, PRDM1, RAG1, RBP1, RXRA, SORCS3, TBP, UTRN, WT1, ZEB1</i>                                                                         |
| FTO                    | enzyme                                | 8.77 x 10 <sup>-8</sup> | <i>AHR, ATF6, BCL11B, CD46, CD80, CEBPA, CXCL9, DBP, ELK1, ETS1, ETS2, FEM1B, FHIT, FOSL1, FOXA1, FOXA2, FOXM1, FOXP3, GATA2, IRF1, JUNB, KCND2, KLF15, LEP, MOG, PDCD4, PFKP, PGR, PHLPP1, POU1F1, PRDM1, RAG1, RBP1, SELP, SORCS3, SP1, TBP, TCF7L2, UTRN, VCL, WT1, ZEB1</i> |
| MT1                    | other                                 | 9.79 x 10 <sup>-8</sup> | <i>ATF3, CEBPA, ETS2, FOS, JUN, LEP, MYC</i>                                                                                                                                                                                                                                    |
| L-type Calcium Channel | complex                               | 1.17 x 10 <sup>-7</sup> | <i>AHR, ANKH, ATF1, ATF6, BCAR3, BCL11B, CALR, CAMK2D, CD80, CEBPA, CREM, DBP, ETS1, FHIT, FOS, FOSL1, FOXM1, FOXP3, GATA2, GRIK2, ICAM1, ICAM3, JUN, JUNB, JUND, KCND2, LEP, MDGA1, MIGA1, MYC,</i>                                                                            |

|         |        |                         |                                                                                                                                                                                                                                                                                                                                                                                                                                                                                                                                                                                                                                                                                                                                                                                                                                                                                                                                          |
|---------|--------|-------------------------|------------------------------------------------------------------------------------------------------------------------------------------------------------------------------------------------------------------------------------------------------------------------------------------------------------------------------------------------------------------------------------------------------------------------------------------------------------------------------------------------------------------------------------------------------------------------------------------------------------------------------------------------------------------------------------------------------------------------------------------------------------------------------------------------------------------------------------------------------------------------------------------------------------------------------------------|
|         |        |                         | <i>NFATC2, NKX2-1, PGR, POU1F1, PRDM1, RAG1, RASGRF1, ROBO1, SELP, SEMA4A, SORCS3, SP1, STC1, SV2C, TBP, UTRN, WT1, ZEB1</i>                                                                                                                                                                                                                                                                                                                                                                                                                                                                                                                                                                                                                                                                                                                                                                                                             |
| PIKFYVE | kinase | 1.50 × 10 <sup>-7</sup> | <i>AHR, ATF3, CEBPB, ELK1, ETS1, FHIT, FOS, FOSL1, FOXM1, FOXP3, GATA2, HES1, JUN, LEP, MOG, MYC, PFKP, PGR, RAG1, UTRN, WT1, ZEB1</i>                                                                                                                                                                                                                                                                                                                                                                                                                                                                                                                                                                                                                                                                                                                                                                                                   |
| LATS1   | kinase | 1.78 × 10 <sup>-7</sup> | <i>ABCA4, ABLIM3, ALDH4A1, APBB2, ARHGEF9, ATF3, ATF6, ATP6V0D2, ATP6V1H, ATXN1, BCL11B, BEND5, BRF2, CACNB2, CALR, CAMK2D, CAST, CD46, CDC42BPB, CHD9, CHI3L2, CHMP4A, CIT, CNOT4, CNTNAP2, COL14A1, CREM, CTBP2, CXCL9, DAB1, DBP, DHX9, EIF2B1, EP400, FAM171A1, FHIT, FMN1, FOXA1, FOXJ1, FOXK1, FOXM1, GABRA1, GADD45GIP1, GATA1, GBX1, GH1, GNAQ, HDAC9, HIP1, HNF1A, ICAM3, ICAM5, IQGAP1, KCNIP4, KLF15, KLHL1, KPNA3, LCP1, LIMD2, LRP2, MAP3K3, MFAP3, MOG, MTMR7, MYC, MYO10, NEDD8, NEK1, NFATC2, NKX2-1, NLGN1, NLGN4X, NTNG1, NTRK2, PAICS, PARD3, PGR, PIK3R1, PKIA, PLAC1, PLCB1, PLCH1, POLD3, PPAT, PPM1H, PRKD1, PRKG1, PRKN, PTGER3, PTPN11, QKI, RAB3C, RAD23A, RAG2, RBL2, RGS12, ROBO1, RPE65, RPL8, RXRA, SBF1, SCRIB, SEMA3E, SEMA4A, SHROOM3, SORCS3, SPAG9, ST3GAL5, STAT4, STC1, SUCLG1, TBP, TFAP2A, THRB, TJP2, TNFRSF8, TPP2, UPK1B, USP33, UTRN, VAMP4, VCL, WWOX, YY1, ZEB1, ZFP57, ZNF148, ZNF804A</i> |



|       |                        |                         |                                                                                                                                                                                                                                                                                                                                                                                                                                                                                                                                                                                                                                                                                                                                                                                                                                                                                                                                                                                                                        |
|-------|------------------------|-------------------------|------------------------------------------------------------------------------------------------------------------------------------------------------------------------------------------------------------------------------------------------------------------------------------------------------------------------------------------------------------------------------------------------------------------------------------------------------------------------------------------------------------------------------------------------------------------------------------------------------------------------------------------------------------------------------------------------------------------------------------------------------------------------------------------------------------------------------------------------------------------------------------------------------------------------------------------------------------------------------------------------------------------------|
| NPHS1 | other                  | 2.20 × 10 <sup>-7</sup> | ATF3, CD46, CD80, CEBPA, CEBPB, CXCL9, ELK1, FHIT, FOSL1, FOXM1, GATA2, HNF4A, ICAM1, JUN, JUNB, JUND, KLF15, LEP, MYC, NFATC2, NR3C1, PGR, PRDM1, RAG1, RBP1, RXRA, SORCS3, TBP, TNFRSF8, UTRN, WT1, ZEB1                                                                                                                                                                                                                                                                                                                                                                                                                                                                                                                                                                                                                                                                                                                                                                                                             |
| BTNL2 | transmembrane receptor | 2.22 × 10 <sup>-7</sup> | ABCA4, ABL1, ACER1, ALDH4A1, APBB2, APPL2, ARHGAP24, ARHGEF9, ATF6, ATP6V0D2, ATP6V1H, ATXN1, BCAR3, BCL11B, BMP6, BRF2, CALR, CAMK2D, CAST, CD109, CD46, CDC42BPB, CEBPB, CHI3L2, CHMP4A, CLEC7A, CNOT4, COL14A1, DGKI, DHX9, DNMBP, EIF2B1, ELK1, EP400, ERAP1, ETS1, ETS2, EYA4, FAM208A, FHIT, FMN1, FOS, FOSL1, FOXA2, FOXJ1, FOXM1, FOXP3, GABRA1, GADD45GIP1, GATA1, GBX1, GGCT, GLCCI1, GNAI2, GNAQ, HES1, HIP1, HNF1A, HOXA5, ICAM5, IL1R2, IQGAP1, IRF2, IVNS1ABP, JUNB, KCND2, KLF15, KPNA3, LCP1, LEP, LIMD2, LNPEP, LRP2, MAGEA11, MAP3K3, MFAP3, MIOX, MOG, MTMR7, MYC, MYO10, NEDD8, NEK1, NKX2-1, NLGN1, NLGN4X, NOD1, NR3C1, PAFAH1B1, PAX5, PFKP, PGR, PHLPP1, PIK3R1, PKHD1, PKIA, PLCB1, POU1F1, PRDM1, PRKD1, PRKN, PTPN11, RAB10, RAB3C, RAG1, RAG2, RASGRF1, RBL2, RBP1, REST, RGS12, RPE65, RPL8, RXRA, SBF1, SCRIB, SELP, SEMA3E, SHROOM3, SIPA1L3, SLC38A3, SPAG9, ST3GAL5, ST8SIA5, STAT4, STC1, SV2C, TCF7L2, THRB, TIAM1, TJP2, TMED2, TNFRSF8, TPP2, USP33, UTRN, VAMP4, WT1, WWOX, ZEB1 |
| CDON  | other                  | 2.40 × 10 <sup>-7</sup> | ATF3, CD46, CD80, CEBPB, CXCL9, ELK1, ETS1, FHIT, FOSL1, FOXA1, FOXA2, FOXM1, GATA2, HES1, ICAM1, JUN, JUNB, KLF15, LCP1, LEP, MYC, NFATC2, PGR, PRDM1,                                                                                                                                                                                                                                                                                                                                                                                                                                                                                                                                                                                                                                                                                                                                                                                                                                                                |

|       |                            |                         |                                                                                                                                                                                                                                                                                                                                                                                                                                                                                                                                                                                                                                                                                                 |
|-------|----------------------------|-------------------------|-------------------------------------------------------------------------------------------------------------------------------------------------------------------------------------------------------------------------------------------------------------------------------------------------------------------------------------------------------------------------------------------------------------------------------------------------------------------------------------------------------------------------------------------------------------------------------------------------------------------------------------------------------------------------------------------------|
|       |                            |                         | <i>RAG1, RBP1, SORCS3, TBP, UTRN, WT1, ZEB1</i>                                                                                                                                                                                                                                                                                                                                                                                                                                                                                                                                                                                                                                                 |
| FZD4  | G-protein coupled receptor | 2.48 x 10 <sup>-7</sup> | <i>AHR, ATF3, ATF6, BCL11B, CD80, CEBPA, DBP, ETS1, FOS, FOSL1, FOXA2, GATA2, HNF1A, HNF4A, ICAM1, IRF1, JUN, JUNB, JUND, LIMD2, MTMR7, MYC, NKX2-1, POU1F1, PRDM1, RAD23A, RBP1, RXRA, SP1, TBP, WT1, ZEB1</i>                                                                                                                                                                                                                                                                                                                                                                                                                                                                                 |
| CARM1 | transcription regulator    | 2.51 x 10 <sup>-7</sup> | <i>ABCA4, ABLIM3, AHR, ALDH4A1, APBB2, ARHGEF9, ATF1, ATP6V1H, ATXN1, BEND5, CALR, CAMK2D, CAST, CD80, CDC42BPB, CEBPA, CHMP4A, CIT, CLEC7A, CLSTN2, CNOT4, COL14A1, CREM, CXCL9, DBP, EIF2B1, ELK1, ERAP1, ETS1, ETS2, FMN1, FOSL1, FOXA1, FOXO4, FOXP3, GATA1, GLCCI1, GNAQ, GRIK2, HDAC9, HIP1, ICAM1, IQGAP1, JUND, KCND2, KPNA3, LEP, MAP3K3, MDGA1, MIGA1, MYC, NEDD8, NEK1, NFATC2, NKX2-1, NLGN1, NLGN4X, NR3C1, NTNG1, PDCD4, PFKP, PGR, PKIA, PLCB1, PRDM1, PRKD1, PRKG1, PRKN, PTGER3, PTPN11, RAB3C, RAD23A, RASGRF1, RBL2, RBP1, RGS12, ROBO1, SCRIB, SELP, SEMA4A, SHROOM3, SORCS3, SP1, SPAG9, STAT4, STC1, SUCLG1, SV2C, TBP, TGFB2, THRB, TJP2, TPP2, VCL, WNT2, WT1, ZEB1</i> |
| NEIL1 | enzyme                     | 3.04 x 10 <sup>-7</sup> | <i>AHR, ALDH4A1, ANKH, APBB2, API5, ATF1, ATF3, ATF6, ATXN1, BCL11B, CALR, CAMK2D, CAST, CD46, CD80, CIT, COL14A1, CXCL9, DBP, EIF2B1, ELK1, ERAP1, ETS2, FOS, FOSL1, FOXA1, FOXM1, FOXO4, FOXP3, GATA1, GATA2, GH1, GLCCI1, GRIK2, HDAC9, HES1, HIP1, ICAM1, IRF1, JUN, JUNB, JUND, KCND2, KLF15, LEP, MDGA1, MIGA1, MYO10, NEDD8, NFATC2, NKX2-1, NR3C1, PAX5, PFKP, PRDM1,</i>                                                                                                                                                                                                                                                                                                               |

|        |               |                       |                                                                                                                                                                                                                                                                                                                                                                                                                 |
|--------|---------------|-----------------------|-----------------------------------------------------------------------------------------------------------------------------------------------------------------------------------------------------------------------------------------------------------------------------------------------------------------------------------------------------------------------------------------------------------------|
|        |               |                       | <i>PRKD1, PRKG1, PRKN, PTPN11, RAB3C, RAD23A, RAG1, RAG2, RASGRF1, RBL2, RBP1, RGS12, RXRA, SCRIB, SELP, SEMA4A, SHROOM3, SORCS3, SP1, STC1, SUCLG1, SV2C, TBP, TCF7L2, TGFB2, TJP2, VCL, WNT2, WT1, YY1, ZEB1</i>                                                                                                                                                                                              |
| VGF    | growth factor | $3.10 \times 10^{-7}$ | <i>ATF1, ATF3, CD46, CD80, CEBPA, CEBPB, CREM, CXCL9, DGKI, ELK1, ERAP1, ETS1, FHIT, FOS, FOSL1, FOXM1, FOXP3, GATA2, GRIK2, HES1, ICAM1, JUN, JUNB, JUND, KCND2, KLF15, LEP, MDGA1, MIGA1, MYC, NFATC2, NKX2-1, PGR, PRDM1, PRKG1, QKI, RAG1, RASGRF1, RBP1, ROBO1, SEMA4A, SORCS3, STC1, SV2C, TBP, TCF7L2, UTRN, WT1, ZEB1</i>                                                                               |
| GNRH2  | other         | $3.29 \times 10^{-7}$ | <i>ABCA4, ARHGEF9, ATF3, ATP6V1H, ATXN1, BCAR3, CDC42BPB, CEBPA, CHMP4A, CIT, CLEC7A, CNOT4, ELK1, EP400, ETS1, FHIT, FMN1, FOSL1, FOXM1, FOXO4, FOXP3, GABRA1, GATA2, GNAQ, ICAM3, IQGAP1, IRF1, JUN, JUNB, JUND, KPNA3, LEP, MAP3K3, MYO10, NEK1, NLGN1, NLGN4X, PDCD4, PFKP, PGR, PLCB1, PPM1H, PRDM1, PTGER3, RAG1, RBL2, ROBO1, SP1, SPAG9, STC1, TCF7L2, TGFB2, THRB, TJP2, TPP2, UTRN, VCL, WT1</i>      |
| DYRK1A | kinase        | $3.58 \times 10^{-7}$ | <i>AFAP1, AHR, ALDH4A1, APBB2, ATF1, ATF3, ATXN1, BCL11B, CAMK2D, CD46, CD80, COL14A1, CREM, CXCL9, EIF2B1, ELK1, ETS1, ETS2, FHIT, FOSL1, FOXA2, GATA2, GRIK2, HDAC9, HES1, HNF1A, HNF1B, HNF4A, HOXA5, ICAM1, ICAM5, IL1R2, IRF1, JUN, KCND2, KCNIP4, KLHL1, LRP2, MDGA1, MIGA1, NEDD8, NFATC2, NKX2-1, NR3C1, NTRK2, PAX5, PFKP, PIK3R1, POU1F1, PRKD1, PRKG1, PRKN, PTPN11, QKI, RAD23A, RAG1, RASGRF1,</i> |

|       |                                       |                         |                                                                                                                                                                                                                                                                                                        |
|-------|---------------------------------------|-------------------------|--------------------------------------------------------------------------------------------------------------------------------------------------------------------------------------------------------------------------------------------------------------------------------------------------------|
|       |                                       |                         | <i>RBL2, RGS12, RPE65, RXRA, SCRIB, SELP, SEMA4A, SHROOM3, SIPA1L3, SORCS3, STC1, SUCLG1, SV2C, SYNE1, TBP, TCF7L2, TGFB2, TIAM1, UTRN, VCL, WNT2, WT1, WWOX, ZNF148</i>                                                                                                                               |
| SERCA | group                                 | 4.44 × 10 <sup>-7</sup> | <i>ATF3, BCAR3, CALR, CD46, CD80, CEBPA, CEBPB, CXCL9, ELK1, FHIT, FOSL1, FOXM1, FOXP3, GATA2, HES1, ICAM3, JUN, KLF15, LCP1, LEP, MYC, NFATC2, PGR, RAG1, RBP1, SORCS3, TBP, UTRN, WT1, ZEB1</i>                                                                                                      |
| Ca2+  | chemical -<br>endogenous<br>mammalian | 4.93 × 10 <sup>-7</sup> | <i>AHR, ANKH, ATF3, CALR, CD80, CEBPB, COMMD5, CREM, DBP, ELK1, FOS, ICAM1, JUNB, JUND, KCND2, NFATC2, NTRK2, SELP, STC1</i>                                                                                                                                                                           |
| NOV   | growth factor                         | 5.15 × 10 <sup>-7</sup> | <i>ATF3, CD46, CD80, CEBPA, CEBPB, CXCL9, ELK1, FHIT, FOSL1, FOXM1, GATA2, HES1, HNF4A, ICAM1, JUN, JUNB, JUND, KLF15, LEP, MYC, NFATC2, PGR, PRDM1, RAG1, RBP1, RXRA, SORCS3, TBP, UTRN, WT1, ZEB1</i>                                                                                                |
| DGCR8 | enzyme                                | 5.32 × 10 <sup>-7</sup> | <i>ACTG1, AHR, ATF3, ATF6, CALR, CD80, ETS1, FHIT, FOS, FOSL1, FOXM1, GATA1, GATA2, GMPR, HES1, HNF1A, HNF1B, HNF4A, ICAM1, IL1R2, IVNS1ABP, JUND, KCNN2, LEP, MYC, NR3C1, PDCD4, PGR, PPM1H, PRDM1, PSMA2, RAG1, RAG2, RBP1, RXRA, SEMA3E, SMARCD2, ST8SIA5, TBP, TCF7L2, TFAP2A, UTRN, WT1, ZEB1</i> |
| PARP1 | enzyme                                | 5.83 × 10 <sup>-7</sup> | <i>AHR, ALDH4A1, ANKH, APBB2, API5, ATF1, ATF3, ATF6, ATXN1, BCL11B, CALR, CAMK2D, CAST, CD46, CD80, CIT, COL14A1, CXCL9, DBP, EIF2B1, ELK1, ERAP1, ETS2, FOS, FOSL1, FOXA1, FOXM1, FOXO4, FOXP3, GATA1, GATA2, GH1, GLCCI1, GRIK2, HDAC9, HES1, HIP1, ICAM1, IRF1,</i>                                |

|         |                         |                       |                                                                                                                                                                                                                                                                                                                                                                                                                                                                                                                                                                                                                                                 |
|---------|-------------------------|-----------------------|-------------------------------------------------------------------------------------------------------------------------------------------------------------------------------------------------------------------------------------------------------------------------------------------------------------------------------------------------------------------------------------------------------------------------------------------------------------------------------------------------------------------------------------------------------------------------------------------------------------------------------------------------|
|         |                         |                       | <i>JUN, JUNB, JUND, KCND2, KLF15, MDGA1, MIGA1, MYO10, NEDD8, NFATC2, NKX2-1, NR3C1, PAX5, PFKP, PRDM1, PRKD1, PRKG1, PRKN, PTPN11, RAB3C, RAD23A, RAG1, RAG2, RASGRF1, RBL2, RBP1, RGS12, RXRA, SCRIB, SELP, SEMA4A, SHROOM3, SORCS3, SP1, STC1, SUCLG1, SV2C, TBP, TCF7L2, TGFB2, TJP2, VCL, WNT2, WT1, YY1, ZEB1</i>                                                                                                                                                                                                                                                                                                                         |
| RPS6KA1 | kinase                  | $5.95 \times 10^{-7}$ | <i>ABCA4, AHR, ARHGEF9, ATF1, ATP6V1H, BMP6, CAMK2D, CD80, CDC42BPB, CEBPA, CHMP4A, CIT, CLEC7A, CNOT4, CSRP2, CXCL9, DBP, ELK1, EPHA3, ERAP1, ETS1, FMN1, FOXA2, FOXM1, FOXO4, FOXP3, GH1, GMPR, GNAQ, GRIA4, GRIK2, HDAC9, HIP1, HNF4A, IQGAP1, IVNS1ABP, JUND, KCND2, KCNN2, KPNA3, MAP3K3, MDGA1, MIGA1, NEK1, NFATC2, NKX2-1, NLGN1, NLGN4X, NOD1, NR3C1, PAFAH1B1, PAX5, PDCD4, PGR, PHLPP1, PKHD1, PLCB1, POU1F1, PPM1H, PRDM1, PSMA2, PTGER3, RAB10, RAB3C, RAG2, RASGRF1, RBL2, RBP1, RXRA, SEMA3E, SEMA4A, SMARCD2, SORCS3, SP1, SPAG9, ST8SIA5, STAT4, STC1, SV2C, TCF7L2, TFAP2A, TGFB2, THRB, TJP2, TPP2, UBA6, VCL, WNT2, WT1</i> |
| DDX54   | transcription regulator | $6.11 \times 10^{-7}$ | <i>ABCA4, ACER1, ARHGEF9, ATF3, ATP6V1H, ATXN1, CDC42BPB, CEBPA, CHMP4A, CIT, CLEC7A, CNOT4, EP400, EPHA3, EYA4, FMN1, FOS, FOXA1, FOXO4, FOXP3, GABRA1, GGCT, GNAQ, HES1, HNF1B, IQGAP1, JUN, JUNB, JUND, KPNA3, LEP, MAP3K3, MYC, MYO10, NEK1, NLGN1, NLGN4X, PDCD4, PFKP, PLAC1, PLCB1, PPM1H, PTGER3, RBL2, RBP1, ROBO1, SP1, SPAG9, STC1, TCF7L2, TFAP2A, TGFB2, THRB, TJP2, TPP2, VCL, ZEB1</i>                                                                                                                                                                                                                                           |

|          |                                 |                         |                                                                                                                                                                                                                                                                                                       |
|----------|---------------------------------|-------------------------|-------------------------------------------------------------------------------------------------------------------------------------------------------------------------------------------------------------------------------------------------------------------------------------------------------|
| GRM5     | G-protein coupled receptor      | 7.28 × 10 <sup>-7</sup> | AHR, ATF1, ATF6, BCAR3, CALR, CD46, CD80, CREM, CXCL9, DAB1, DBP, DGKI, ERAP1, ETS1, FHIT, FOS, FOSL1, FOXA2, FOXP3, GATA2, HES1, ICAM1, ICAM3, JUN, JUNB, JUND, KLF15, LEP, MYC, NFATC2, NR3C1, PAFAH1B1, PAX5, PGR, POU1F1, PRDM1, PRKG1, QKI, RAG1, RBP1, SORCS3, SP1, TBP, UPK1B, UTRN, WT1, ZEB1 |
| RIT1     | enzyme                          | 7.30 × 10 <sup>-7</sup> | ATF3, BMP6, CD46, CD80, CEBPA, CEBPB, CXCL9, ELK1, EPHA3, ETS1, FHIT, FOSL1, FOXM1, GATA2, HES1, ICAM1, JUN, JUNB, KLF15, LEP, MYC, NFATC2, NR3C1, PGR, PRDM1, RAG1, RBP1, SORCS3, TBP, UTRN, WT1, ZEB1                                                                                               |
| MCAM     | other                           | 7.47 × 10 <sup>-7</sup> | ATF3, CEBPB, DAB1, ELK1, ETS1, FHIT, FOSL1, FOXM1, FOXP3, GATA2, HES1, ICAM1, ICAM5, JUN, LEP, MYC, PGR, RAG1, UTRN, VCL, WT1, ZEB1                                                                                                                                                                   |
| iodide   | chemical - endogenous mammalian | 8.15 × 10 <sup>-7</sup> | ATF3, CD46, CD80, CEBPA, CEBPB, CXCL9, DBP, ETS1, FOS, ICAM1, JUN, JUNB, KLF15, LEP, MYC, NFATC2, NKX2-1, NR3C1, POU1F1, PRDM1, RBP1, SORCS3, TBP                                                                                                                                                     |
| Frizzled | group                           | 8.16 × 10 <sup>-7</sup> | AHR, ATF3, ATF6, BCL11B, CEBPA, CEBPB, DBP, ELK1, ETS1, FOS, FOSL1, FOXA2, FOXO4, GATA2, HES1, HNF1A, JUN, JUNB, JUND, LEP, LIMD2, MTMR7, NKX2-1, POU1F1, PRDM1, RAD23A, RBP1, SP1, TBP, TCF7L2, WT1, ZEB1                                                                                            |

|       |                         |                         |                                                                                                                                                                                                                                                                                                                                                                                                                                                                                                                                                                                                                                                                                                                                                                                                                                                                                                                                                                                                          |
|-------|-------------------------|-------------------------|----------------------------------------------------------------------------------------------------------------------------------------------------------------------------------------------------------------------------------------------------------------------------------------------------------------------------------------------------------------------------------------------------------------------------------------------------------------------------------------------------------------------------------------------------------------------------------------------------------------------------------------------------------------------------------------------------------------------------------------------------------------------------------------------------------------------------------------------------------------------------------------------------------------------------------------------------------------------------------------------------------|
| HOXB7 | transcription regulator | 8.19 x 10 <sup>-7</sup> | ABCA4, ABL1, ACER1, ACTG1, ADGRE3, AFAP1, AGAP3, ALDH4A1, ANXA7, APBB2, APPL2, ARHGEF9, ATF1, ATF6, ATP6V1H, ATP7B, ATXN1, BCL11B, CAMK2D, CAST, CD276, CDC42BPB, CEBPA, CEBPB, CHD9, CHMP4A, CIT, CLEC7A, CLSTN2, CNOT4, CNTNAP2, CSRP2, DGKI, EIF2B1, ELK1, EPHA3, ETS1, EYA4, FAM171A1, FEM1B, FHIT, FMN1, FOSL1, FOXO4, FOXP3, FRK, GABRA1, GATA1, GATA2, GGCT, GH1, GIMAP6, GLCC1, GMPR, GNAI2, GNAQ, GRIK2, GYPC, HES1, HNF1B, ICAM5, IL1R2, IQGAP1, IRF1, IVNS1ABP, JUNB, JUND, KCNIP4, KCNN2, KLF15, KLHL1, KPNA3, LCP1, LIMD2, LNPEP, LUC7L3, MAGEA11, MAP3K3, MDGA1, MIGA1, MOG, MTMR7, MYC, MYO10, NEDD8, NEK1, NFIA, NLGN1, NLGN4X, NR3C1, PAFAH1B1, PAICS, PFKP, PGR, PHLPP1, PKHD1, PKIA, PLAC1, PPAT, PPM1H, PRDM1, PRKD1, PRKG1, PRKN, PTGER3, PTPN11, QKI, RAB10, RAG1, RASGRF1, RGS12, ROBO1, SCRIB, SDK1, SELP, SHROOM3, SLC25A15, SLC38A3, SNTB1, SORCS3, SP1, SPAG9, ST3GAL5, STC1, SUCLG1, SV2C, SWT1, TFAP2A, TICRR, TJP2, TMED2, UTRN, VCL, WNT2, WWOX, YY1, ZEB1, ZFP57, ZNF148 |
| TAF4  | transcription regulator | 8.63 x 10 <sup>-7</sup> | ACTG1, AHR, ATF1, ATF3, CD80, CEBPB, CNOT4, CREM, CXCL9, DBP, ELK1, ERAP1, FHIT, FOS, FOXA1, FOXA2, FOXM1, FOXP3, GATA2, GRIK2, HDAC9, HES1, HIP1, HNF1A, HNF1B, HOXA5, ICAM1, IRF1, JUN, JUNB, JUND, KCND2, LEP, MDGA1, MIGA1, MYC, NFIA, NKX2-1, PDCD4, PGR, PPAT, PRKG1, PSMA2, RAB3C, RAG1, RASGRF1, RBP1, ROBO1, RPE65, SEMA3E, SEMA4A, SMARCD2, SORCS3, ST8SIA5, STAT4, STC1, SV2C, TFAP2A, TGFB2, UTRN, WT1, ZEB1                                                                                                                                                                                                                                                                                                                                                                                                                                                                                                                                                                                 |

|           |                           |                         |                                                                                                                                                                                                                                                                                                                                                                                                                                                                                                                                                                                                                                                                                                                                                                   |
|-----------|---------------------------|-------------------------|-------------------------------------------------------------------------------------------------------------------------------------------------------------------------------------------------------------------------------------------------------------------------------------------------------------------------------------------------------------------------------------------------------------------------------------------------------------------------------------------------------------------------------------------------------------------------------------------------------------------------------------------------------------------------------------------------------------------------------------------------------------------|
| APBB1     | transcription regulator   | 8.73 × 10 <sup>-7</sup> | ABCA4, ACER1, ALDH4A1, APBB2, ARHGEF9, ATF1, ATF3, ATF6, ATP6V1H, ATXN1, BCAR3, BCL11B, CAMK2D, CD46, CDC42BPB, CEBPA, CEBPB, CHMP4A, CIT, CLEC7A, CNOT4, COL14A1, EIF2B1, EPB41L5, EPHA3, ETS2, EYA4, FEM1B, FHIT, FMN1, FOS, FOXA1, FOXJ1, FOXM1, FOXO4, FOXP3, GATA2, GGCT, GNAQ, GRIK2, HES1, ICAM1, ICAM3, ICAM5, IL1R2, IQGAP1, IRF1, IVNS1ABP, JUN, JUNB, JUND, KCND2, KLF15, KPNA3, LEP, MAP3K3, MDGA1, MIGA1, MOG, MYC, NEDD8, NEK1, NFATC2, NKX2-1, NLGN1, NLGN4X, PAX5, PDCD4, PGR, PLAC1, PLCB1, PRKD1, PRKN, PTGER3, PTPN11, RAD23A, RAG1, RASGRF1, RBL2, RBP1, RGS12, ROBO1, RPE65, RXRA, SCRIB, SEMA4A, SHROOM3, SLC38A3, SORCS3, SP1, SPAG9, ST3GAL5, STC1, SUCLG1, SV2C, TCF7L2, TFAP2A, TGFB2, THRB, TJP2, TNFRSF8, TPP2, UTRN, WNT2, YY1, ZEB1 |
| KLF9      | transcription regulator   | 9.02 × 10 <sup>-7</sup> | ABCA4, ARHGEF9, ATF3, ATP6V1H, ATXN1, CDC42BPB, CEBPA, CHMP4A, CIT, CLEC7A, CNOT4, EP400, FMN1, FOS, FOXM1, FOXO4, FOXP3, GABRA1, GNAQ, HES1, IQGAP1, IRF1, JUN, JUNB, JUND, KPNA3, LEP, MAP3K3, MYC, MYO10, NEK1, NLGN1, NLGN4X, PDCD4, PFKP, PGR, PLCB1, PPM1H, PTGER3, RBL2, ROBO1, SP1, SPAG9, STC1, TCF7L2, TGFB2, THRB, TJP2, TPP2, VCL, ZEB1                                                                                                                                                                                                                                                                                                                                                                                                               |
| NDNF      | other                     | 9.42 × 10 <sup>-7</sup> | ATF3, CD80, CEBPB, ELK1, ETS1, FHIT, FOS, FOSL1, FOXM1, GATA2, HES1, ICAM1, JUN, LEP, MYC, PGR, RAG1, UTRN, WT1, ZEB1                                                                                                                                                                                                                                                                                                                                                                                                                                                                                                                                                                                                                                             |
| pCPT-cAMP | chemical kinase inhibitor | 9.99 × 10 <sup>-7</sup> | CD80, CEBPA, CEBPB, CREM, FOS, FOSL1, FOXA2, GRIK2, HNF4A, IRF1, JUN, JUNB,                                                                                                                                                                                                                                                                                                                                                                                                                                                                                                                                                                                                                                                                                       |



|           |                           |                         |                                                                                                                                                                                                                                                                                                                                                                                                                                                                                                                                                                                                                                                                                                                                                                                                                                             |
|-----------|---------------------------|-------------------------|---------------------------------------------------------------------------------------------------------------------------------------------------------------------------------------------------------------------------------------------------------------------------------------------------------------------------------------------------------------------------------------------------------------------------------------------------------------------------------------------------------------------------------------------------------------------------------------------------------------------------------------------------------------------------------------------------------------------------------------------------------------------------------------------------------------------------------------------|
|           |                           |                         | <i>JUND, LEP, PGR, PIK3R1, POU1F1, PRKG1, RBL2, SLC38A3</i>                                                                                                                                                                                                                                                                                                                                                                                                                                                                                                                                                                                                                                                                                                                                                                                 |
| ICAM3     | transmembrane receptor    | 1.10 × 10 <sup>-6</sup> | <i>AHR, ATF3, ATF6, BCL11B, CEBPB, DBP, ELK1, ETS1, FHIT, FOSL1, FOXM1, GATA2, HES1, JUN, JUNB, LEP, MYC, PGR, POU1F1, RAG1, SP1, UTRN, WT1, ZEB1</i>                                                                                                                                                                                                                                                                                                                                                                                                                                                                                                                                                                                                                                                                                       |
| PD 180970 | chemical kinase inhibitor | 1.10 × 10 <sup>-6</sup> | <i>ABCA4, ACTG1, AHR, ALDH4A1, APBB2, ARHGEF9, ATF6, ATP6V1H, ATXN1, BCAR3, BCL11B, BMP6, BRF2, CACNB2, CAMK2D, CD46, CD80, CDC42BPB, CEBPA, CEBPB, CHI3L2, CHMP4A, CIT, CNOT4, COL14A1, CREM, CSRP2, CXCL9, DAB1, DGKI, EIF2B1, ELK1, ETS2, EYA4, F2RL3, FEM1B, FHIT, FMN1, FOXJ1, FOXM1, FOXP3, GATA1, GBX1, GH1, GLCCI1, GNAQ, HIP1, ICAM1, ICAM3, ICAM5, IQGAP1, IRF2, JUNB, KCND2, KCNIP4, KLF15, KLHL1, KPNA3, LCP1, LEP, LRP2, LUC7L3, MAP3K3, MFAP3, MOG, MYC, NEDD8, NEK1, NFATC2, NLGN1, NLGN4X, NTRK2, PAX5, PDCD4, PGR, PHLPP1, PIK3R1, PLCB1, PLCH1, POU1F1, PRDM1, PRKD1, PRKN, PSMA2, PTGER3, PTPN11, PTPRS, QKI, RAB3C, RAG2, RBL2, RBP1, RGS12, ROBO1, RPE65, RPL8, SCRIB, SHROOM3, SMARCD2, SORCS3, SPAG9, ST8SIA5, STC1, SUCLG1, TFAP2A, TGFB2, THRB, TIAM1, TNFRSF8, TPP2, UPK1B, UTRN, VAMP4, VCL, WNT2, YY1, ZEB1</i> |
| USP43     | peptidase                 | 1.11 × 10 <sup>-6</sup> | <i>ABCA4, ABL1, AFAP1, AHR, ALDH4A1, APBB2, API5, ARHGEF9, ATF1, ATF3, ATP6V0D2, ATP6V1H, ATP7B, BRF2, CAMK2D, CAST, CD276, CD46, CD80, CDC42BPB, CEBPB, CHI3L2, CHMP4A, CIT, CLEC7A, CNOT4, CREM, CXCL9, DBP, DGKI, EIF2B1, ELK1, EPB41L5, EPHA3, ERAP1, ETS1, ETS2, FEM1B, FHIT, FMN1, FOS,</i>                                                                                                                                                                                                                                                                                                                                                                                                                                                                                                                                           |

|       |                         |                         |                                                                                                                                                                                                                                                                                                                                                                                                                                                                                                                                                                                                                                                                    |
|-------|-------------------------|-------------------------|--------------------------------------------------------------------------------------------------------------------------------------------------------------------------------------------------------------------------------------------------------------------------------------------------------------------------------------------------------------------------------------------------------------------------------------------------------------------------------------------------------------------------------------------------------------------------------------------------------------------------------------------------------------------|
|       |                         |                         | <p>FOXA1, FOXO4, GADD45GIP1, GATA1, GATA2, GH1, GLCCI1, GNAI2, GNAQ, GRIA4, GRIK2, HDAC9, HIP1, HNF1A, HNF1B, ICAM1, ICAM3, ICAM5, IL1R2, IQGAP1, IRF1, IRF2, IVNS1ABP, JUN, JUNB, KCND2, KLF15, KPNA3, LARGE1, LCP1, LNPEP, MAGEA11, MAP3K3, MDGA1, MIGA1, MSS51, MYO10, NEDD8, NEK1, NKX2-1, NLGN1, NLGN4X, NR3C1, PAICS, PAX5, PHLPP1, PIK3R1, PKHD1, PLCB1, POLD3, POU1F1, PPAT, PRDM1, PRKD1, PRKG1, PRKN, PSMA2, PTGER3, PTPN11, RAB3C, RAD23A, RASGRF1, RGS12, RPE65, RPL8, SCRIB, SEMA3E, SEMA4A, SHROOM3, SNTB1, SORCS3, SPAG9, STAT4, SUCLG1, SV2C, TFAP2A, TGFB2, THRB, TIAM1, TICRR, TJP2, TNFRSF8, UTRN, VAMP4, VCL, WNT2, WT1, WWOX, YY1, ZNF148</p> |
| LIF   | cytokine                | 1.11 × 10 <sup>-6</sup> | <p>ANKRD40, CEBPB, ERAP1, FOS, FOXA2, FOXP3, IRF1, JUN, JUNB, LARGE1, LEP, MYC, PGR, RPE65, WT1, ZFP57</p>                                                                                                                                                                                                                                                                                                                                                                                                                                                                                                                                                         |
| TBX21 | transcription regulator | 1.15 × 10 <sup>-6</sup> | <p>ACTG1, ATXN1, BCAR3, BCL11B, CD276, CD80, CEBPA, CEBPB, CLEC7A, CLIP1, CXCL9, ELK1, FHIT, FNIP2, FOSL1, FOXA1, FOXA2, FOXM1, GATA2, GNAQ, HES1, ICAM3, IL1R2, IPO4, IRF1, JUND, LEP, LPIN2, MYO10, NFATC2, NR3C1, PAX5, PFKP, PGR, PPP6C, PRDM1, PSMA2, RAG1, RAG2, SCRIB, SELP, SEMA4A, SGCD, SNTB1, ST3GAL5, STAT4, TGFB2, TJP2, UTRN, WT1, ZEB1</p>                                                                                                                                                                                                                                                                                                          |
| Gαq   | group                   | 1.16 × 10 <sup>-6</sup> | <p>AHR, ATF3, ATF6, BCL11B, CEBPA, CEBPB, CREM, CXCL9, DBP, ETS1, FOSL1, GNAQ, ICAM1, IRF1, JUN, JUNB, MYC, PGR, POU1F1, PRKG1, SELP, SP1, VCL</p>                                                                                                                                                                                                                                                                                                                                                                                                                                                                                                                 |

|                              |                           |                         |                                                                                                                                                                                                                                                                                                                                                                                                                                                       |
|------------------------------|---------------------------|-------------------------|-------------------------------------------------------------------------------------------------------------------------------------------------------------------------------------------------------------------------------------------------------------------------------------------------------------------------------------------------------------------------------------------------------------------------------------------------------|
| IQUB                         | other                     | 1.16 × 10 <sup>-6</sup> | ACTG1, AHR, CD46, CD80, CEBPA, CEBPB, CSRP2, CXCL9, ELK1, ERAP1, ETS1, FHIT, FNBP1L, FOS, FOXM1, FSCN2, GATA2, HES1, HNF4A, ICAM1, IRF1, JUNB, KLF15, LEP, MYC, NFATC2, PGR, PRDM1, RAG1, RBP1, SELP, SORCS3, TBP, TJP2, UTRN, VCL, ZEB1                                                                                                                                                                                                              |
| DYNLL1                       | other                     | 1.18 × 10 <sup>-6</sup> | ABCA4, AHR, API5, ARHGEF9, ATF3, ATP6V1H, BCAR3, BRF2, CD80, CDC42BPB, CEBPA, CEBPB, CHI3L2, CHMP4A, CIT, CLEC7A, CNOT4, CREM, CXCL9, DBP, ELK1, ERAP1, FMN1, FOS, FOSL1, FOXO4, FOXP3, GNAQ, HDAC9, HES1, HIP1, HNF1A, HNF1B, ICAM3, IQGAP1, IRF1, JUN, JUNB, JUND, KPNA3, LEP, MAP3K3, NEK1, NLGN1, NLGN4X, PDCD4, PGR, PIK3R1, PLCB1, PRDM1, PTGER3, RAB3C, RBL2, ROBO1, RPL8, RXRA, SP1, SPAG9, STAT4, TBP, TCF7L2, TGFB2, THRB, TJP2, TPP2, UTRN |
| 2,5-dihydroxymethylcinnamate | chemical kinase inhibitor | 1.19 × 10 <sup>-6</sup> | ATF3, CD80, CEBPB, ELK1, ETS1, FHIT, FOS, FOSL1, FOXM1, GATA2, HES1, ICAM1, JUN, LEP, MYC, PGR, RAG1, UTRN, WT1, ZEB1                                                                                                                                                                                                                                                                                                                                 |
| FSTL1                        | other                     | 1.36 × 10 <sup>-6</sup> | ANKH, ATF3, CD46, CD80, CEBPA, CEBPB, CXCL9, ELK1, FHIT, FOSL1, FOXM1, FOXP3, GATA2, HES1, HNF4A, JUN, JUNB, JUND, KLF15, LEP, NFATC2, PGR, PRDM1, RAG1, RBP1, RXRA, SORCS3, SP1, TBP, TGFB2, UTRN, WT1, ZEB1                                                                                                                                                                                                                                         |
| Plk                          | group                     | 1.51 × 10 <sup>-6</sup> | ABCA4, ACTG1, ANKH, ARHGEF9, ATF1, ATF3, ATF6, ATP6V0D2, ATP6V1H, BCAR3, BCL11B, BMP6, BRF2, CALR, CD46, CDC42BPB, CHI3L2, CHMP4A, CIT, CLEC7A, CNOT4, CNTNAP2, CSRP2, EP400, EPHA3, ERAP1, ETS2, F5, FHIT, FMN1, FOS, FOXA1, FOXJ1, FOXK1, FOXO4, FOXP3, GABRA1, GLCCI1, GNAI2, GNAQ, GRIK2, HNF1B,                                                                                                                                                  |

|      |       |                         |                                                                                                                                                                                                                                                                                                                                                                                                                                                                                                                                                                                                                                                                                                                                                                                                                                                                                               |
|------|-------|-------------------------|-----------------------------------------------------------------------------------------------------------------------------------------------------------------------------------------------------------------------------------------------------------------------------------------------------------------------------------------------------------------------------------------------------------------------------------------------------------------------------------------------------------------------------------------------------------------------------------------------------------------------------------------------------------------------------------------------------------------------------------------------------------------------------------------------------------------------------------------------------------------------------------------------|
|      |       |                         | <p><i>HNFA4, ICAM1, ICAM3, IL1R2, IQGAP1, IRF2, IVNS1ABP, JUNB, KCND2, KCNIP4, KLF15, KLHL1, KPNA3, LEP, LIMD2, LRP2, MAP3K3, MDGA1, MIGA1, MTMR7, NEK1, NFATC2, NLGN1, NLGN4X, NOD1, NR3C1, PAFAH1B1, PAICS, PAX5, PHLPP1, PIK3R1, PKHD1, PKIA, PLCB1, PPAT, PRDM1, PSMA2, PTGER3, PTPRS, QKI, RAB10, RAG1, RAG2, RASGRF1, RBP1, RPE65, RPL8, RXRA, SBF1, SEMA3E, SLC38A3, SMARCD2, SPAG9, ST8SIA5, STC1, SV2C, THRB, TIAM1, TMED2, TPP2, UBE2E3, UPK1B, UTRN, VAMP4, WWOX, ZFP57</i></p>                                                                                                                                                                                                                                                                                                                                                                                                    |
| KRT5 | other | 1.52 x 10 <sup>-6</sup> | <p><i>ABCA4, ALDH4A1, ANKH, APBB2, ARHGEF9, ATF1, ATF3, ATP6V0D2, ATP6V1H, ATXN1, BCAR3, BMP6, BRF2, CACNB2, CAST, CDC42BPB, CHD9, CHI3L2, CHMP4A, CIT, CLEC7A, CLSTN2, CNOT4, COL14A1, DBP, DGKI, DHX9, EIF2B1, EPHA3, ERAP1, ETS1, ETS2, EYA4, F2RL3, FAM171A1, FAM208A, FHIT, FMN1, FOS, FOSL1, FOXJ1, FOXO4, FOXP3, GABRA1, GATA1, GH1, GLCCI1, GNAI2, GNAQ, GRAP2, GRIK2, HDAC9, HIP1, HNF1A, HNF1B, HNF4A, ICAM1, ICAM3, IL1R2, IQGAP1, IVNS1ABP, JUN, JUNB, JUND, KPNA3, LNPEP, MAGEA11, MDGA1, MIGA1, MIOX, NEDD8, NEK1, NKX2-1, NLGN1, NLGN4X, NTRK2, PAFAH1B1, PDCD4, PHLPP1, PKHD1, PKIA, PLAC1, PLCB1, PLCH1, POU1F1, PRKD1, PRKG1, PRKN, PTGER3, PTPN11, QKI, RAB3C, RAD23A, RAG2, RASGRF1, REST, RGS12, RPL8, RXRA, SCRIB, SEMA4A, SHROOM3, SMARCD2, SORCS3, SPAG9, ST3GAL5, ST8SIA5, STAT4, STC1, SUCLG1, SV2C, TBP, TFAP2A, THRB, TJP2, TMED2, TNFRSF8, TPP2, TXNDC5,</i></p> |

|                 |                                 |                         |                                                                                                                                                                                                                                                                                                                                                                                                                                                                                                                                                                                                                                                                                                                                                                                                                                                                                                                                 |
|-----------------|---------------------------------|-------------------------|---------------------------------------------------------------------------------------------------------------------------------------------------------------------------------------------------------------------------------------------------------------------------------------------------------------------------------------------------------------------------------------------------------------------------------------------------------------------------------------------------------------------------------------------------------------------------------------------------------------------------------------------------------------------------------------------------------------------------------------------------------------------------------------------------------------------------------------------------------------------------------------------------------------------------------|
|                 |                                 |                         | <i>UBA6, USP33, UTRN, VAMP4, WNT2, YY1, ZEB1</i>                                                                                                                                                                                                                                                                                                                                                                                                                                                                                                                                                                                                                                                                                                                                                                                                                                                                                |
| quinolinic acid | chemical - endogenous mammalian | 1.54 x 10 <sup>-6</sup> | <i>AHR, ATF3, CAMK2D, CD80, CEBPA, CREM, CXCL9, DBP, ELK1, ERAP1, FHIT, FOS, FOSL1, FOXM1, FOXP3, GATA2, HDAC9, HES1, HIP1, ICAM1, IRF1, JUN, JUNB, JUND, LEP, MYC, NFATC2, NTRK2, PGR, PRDM1, RAB3C, RAG1, SELP, STAT4, UTRN, ZEB1</i>                                                                                                                                                                                                                                                                                                                                                                                                                                                                                                                                                                                                                                                                                         |
| SGCG            | other                           | 1.56 x 10 <sup>-6</sup> | <i>ABCA4, ALDH4A1, ANKH, APBB2, ARHGEF9, ATF1, ATF3, ATP6V0D2, ATP6V1H, ATXN1, BCAR3, BMP6, BRF2, CACNB2, CAST, CDC42BPB, CHD9, CHI3L2, CHMP4A, CIT, CLEC7A, CLSTN2, CNOT4, COL14A1, DBP, DGKI, DHX9, EIF2B1, EPHA3, ERAP1, ETS1, ETS2, EYA4, F2RL3, FAM171A1, FAM208A, FHIT, FMN1, FOS, FOSL1, FOXJ1, FOXO4, FOXP3, GABRA1, GATA1, GH1, GLCCI1, GNAI2, GNAQ, GRAP2, GRIK2, HDAC9, HIP1, HNF1A, HNF1B, HNF4A, ICAM3, IL1R2, IQGAP1, IVNS1ABP, JUN, JUNB, JUND, KPNA3, LNPEP, MAGEA11, MDGA1, MIGA1, MIOX, NEDD8, NEK1, NKX2-1, NLGN1, NLGN4X, NTRK2, PAFAH1B1, PDCD4, PHLPP1, PKHD1, PKIA, PLAC1, PLCB1, PLCH1, POU1F1, PRKD1, PRKG1, PRKN, PTGER3, PTPN11, QKI, RAB3C, RAD23A, RAG2, RASGRF1, REST, RGS12, RPL8, RXRA, SCRIB, SEMA4A, SGCD, SHROOM3, SMARCD2, SORCS3, SPAG9, ST3GAL5, ST8SIA5, STAT4, STC1, SUCLG1, SV2C, TBP, TFAP2A, THRB, TJP2, TMED2, TNFRSF8, TPP2, TXNDC5, UBA6, USP33, UTRN, VAMP4, WNT2, YY1, ZEB1</i> |

|          |                         |                         |                                                                                                                                                                                                                                                                                                                                                                                                                                                                                                                                                                                                                                                                                                                                                                                            |
|----------|-------------------------|-------------------------|--------------------------------------------------------------------------------------------------------------------------------------------------------------------------------------------------------------------------------------------------------------------------------------------------------------------------------------------------------------------------------------------------------------------------------------------------------------------------------------------------------------------------------------------------------------------------------------------------------------------------------------------------------------------------------------------------------------------------------------------------------------------------------------------|
| GRIN1    | ion channel             | 1.56 x 10 <sup>-6</sup> | AHR, BCAR3, BMP6, CD46, CD80, CEBPA, CEBPB, CREM, CXCL9, DBP, EPHA3, ERAP1, ETS1, FHIT, FOSL1, FOXM1, FOXP3, GATA2, HDAC9, HES1, HIP1, ICAM1, ICAM3, IRF1, JUN, JUNB, KLF15, LEP, MYC, NFATC2, NLGN1, NR3C1, NTRK2, PFKP, PGR, PRDM1, RAB3C, RAG1, RBP1, SORCS3, STAT4, TBP, UTRN, VCL, WT1, ZEB1                                                                                                                                                                                                                                                                                                                                                                                                                                                                                          |
| Integrin | complex                 | 1.58 x 10 <sup>-6</sup> | AHR, FOS, JUN, MYC, TGFB2                                                                                                                                                                                                                                                                                                                                                                                                                                                                                                                                                                                                                                                                                                                                                                  |
| IRF6     | transcription regulator | 1.59 x 10 <sup>-6</sup> | AGA, AHR, ATF3, ATXN1, CALR, CAMK2D, CAST, CD46, CD80, CREM, CXCL9, DBP, ELK1, ETS1, FOS, FOSL1, FOXP3, ICAM1, IRF1, JUN, JUNB, JUND, KLF15, KPNA3, LEP, MARCH3, MED12L, MYC, NFATC2, NR3C1, PGR, POU1F1, PRDM1, RBP1, SELP, SORCS3, TBP, VTI1A, ZEB1                                                                                                                                                                                                                                                                                                                                                                                                                                                                                                                                      |
| PRMT2    | enzyme                  | 1.61 x 10 <sup>-6</sup> | ABCA4, ACER1, AFAP1, AHR, API5, ARHGEF9, ATF1, ATF3, ATF6, ATP6V1H, ATP7B, BCAR3, BCL11B, BRF2, CD276, CD46, CD80, CDC42BPB, CEBPA, CEBPB, CHI3L2, CHMP4A, CIT, CLEC7A, CNOT4, CREM, CXCL9, DBP, DGKI, ELK1, EPB41L5, EPHA3, ERAP1, ETS1, EYA4, FHIT, FMN1, FOXA1, FOXA2, FOXJ1, FOXM1, FOXO4, FOXP3, GADD45GIP1, GATA1, GATA2, GGCT, GNAQ, GRIK2, HDAC9, HIP1, HNF1A, HNF1B, ICAM1, ICAM3, IL1R2, IQGAP1, IRF1, IRF2, IVNS1ABP, JUN, JUNB, JUND, KCND2, KLF15, KPNA3, LARGE1, LCP1, LEP, LNPEP, MAP3K3, MDGA1, MIGA1, MSS51, NEK1, NKX2-1, NLGN1, NLGN4X, NTRK2, PAICS, PDCD4, PGR, PHLPP1, PIK3R1, PLAC1, PLCB1, PRDM1, PSMA2, PTGER3, QKI, RAB3C, RASGRF1, RBL2, ROBO1, RPE65, RPL8, SEMA3E, SEMA4A, SNTB1, SORCS3, SP1, SPAG9, ST3GAL5, STAT4, STC1, SV2C, TCF7L2, TGFB2, THRB, TIAM1, |

|                    |                                       |                         |                                                                                                                                                                                                                                                                                                                                                                                         |
|--------------------|---------------------------------------|-------------------------|-----------------------------------------------------------------------------------------------------------------------------------------------------------------------------------------------------------------------------------------------------------------------------------------------------------------------------------------------------------------------------------------|
|                    |                                       |                         | <i>TICRR, TJP2, TNFRSF8, TPP2, UTRN, VAMP4, WWOX, YY1, ZNF148</i>                                                                                                                                                                                                                                                                                                                       |
| Nfatc              | group                                 | 1.68 × 10 <sup>-6</sup> | <i>AHR, ATF3, FOS, FOXA1, FOXA2, FOXP3, HNF1A, HNF1B, HNF4A, IRF1, JUN, KCND2, MYC, PRDM1, PTPRS, RAB10, UTRN</i>                                                                                                                                                                                                                                                                       |
| ganglioside<br>GD3 | chemical -<br>endogenous<br>mammalian | 1.71 × 10 <sup>-6</sup> | <i>CD80, CEBPB, DBP, ELK1, ETS1, FHIT, FOSL1, FOXM1, GATA2, HES1, ICAM1, JUN, JUNB, LEP, MYC, NR3C1, PGR, POU1F1, RAG1, UTRN, VCL, WT1, ZEB1</i>                                                                                                                                                                                                                                        |
| S100A12            | other                                 | 1.74 × 10 <sup>-6</sup> | <i>AHR, ATF3, CD46, CD80, CEBPA, CEBPB, CREM, CXCL9, DBP, ELK1, ERAP1, FOS, FOSL1, FOXP3, HDAC9, HES1, HIP1, HNF4A, ICAM1, IRF1, JUN, JUNB, JUND, KLF15, LEP, MYC, NFATC2, NR3C1, PGR, POU1F1, PRDM1, RAB3C, RBP1, RXRA, SORCS3, STAT4, TBP</i>                                                                                                                                         |
| PLAT               | peptidase                             | 1.75 × 10 <sup>-6</sup> | <i>ACTG1, AHR, ATF6, CALR, CD46, CD80, CLEC7A, CREM, CXCL9, DBP, ELK1, ERAP1, ETS1, FOS, FOSL1, FOXA2, FOXP3, GATA2, HDAC9, HES1, HIP1, HNF1A, ICAM1, ICAM3, ICAM5, JUN, JUND, KCND2, KLF15, LEP, LIMD2, MOG, MTMR7, MYC, NFATC2, NKX2-1, NOD1, NR3C1, NTRK2, PDCD4, PFKP, PHLPP1, PRDM1, PSMA2, RAB3C, RAD23A, RBP1, RXRA, SEMA3E, SMARCD2, SORCS3, ST8SIA5, STAT4, TBP, WT1, ZEB1</i> |

|        |                        |                         |                                                                                                                                                                                                                                                                                                                                                                                                                                                                                                                                                                                                                                                                                                                                                                                                                        |
|--------|------------------------|-------------------------|------------------------------------------------------------------------------------------------------------------------------------------------------------------------------------------------------------------------------------------------------------------------------------------------------------------------------------------------------------------------------------------------------------------------------------------------------------------------------------------------------------------------------------------------------------------------------------------------------------------------------------------------------------------------------------------------------------------------------------------------------------------------------------------------------------------------|
| TRIM45 | other                  | 1.79 × 10 <sup>-6</sup> | AFAP1, AHR, ANKH, ATXN1, CD276, CD46, CD80, CEBPA, CLEC7A, CSRP2, ETS1, FOS, FOSL1, FOXA2, FOXM1, FOXP3, GADD45GIP1, GATA1, GH1, GNAQ, ICAM1, ICAM5, IL1R2, IRF1, JUN, JUNB, JUND, KIR3DL1, LCP1, LEP, MYC, NFATC2, NR3C1, PAX5, PDCD4, PGR, PPP6C, PRDM1, PSMA2, QKI, RAG2, RBP1, RXRA, SELP, SEMA3E, SMARCD2, SNTB1, ST8SIA5, TGFB2, TIAM1, TICRR, TJP2, TNFRSF8, VCL, WT1, WWOX, ZNF148                                                                                                                                                                                                                                                                                                                                                                                                                             |
| PTPN5  | phosphatase            | 1.79 × 10 <sup>-6</sup> | ATF3, CD46, CD80, CEBPA, CEBPB, CXCL9, DAB1, DBP, ETS1, FOXP3, ICAM1, JUN, JUNB, KLF15, LEP, MYC, NFATC2, NR3C1, POU1F1, PRDM1, RBP1, SORCS3, TBP                                                                                                                                                                                                                                                                                                                                                                                                                                                                                                                                                                                                                                                                      |
| CD22   | transmembrane receptor | 1.80 × 10 <sup>-6</sup> | ABCA4, ABL1, AFAP1, ALDH4A1, APBB2, ARHGEF9, ATP6V0D2, ATP6V1H, ATXN1, BMP6, CAMK2D, CAST, CD276, CD80, CDC42BPB, CHMP4A, CIT, CLEC7A, CLSTN2, CNOT4, COL14A1, DAB1, DHX9, EIF2B1, EPHA3, ETS1, EYA4, F2RL3, FMN1, FOSL1, GABRA1, GADD45GIP1, GATA1, GNAI2, GNAQ, GRAP2, GRIA4, HNF1A, HNF1B, HOXA5, ICAM1, ICAM5, IL1R2, IQGAP1, IRF1, IRF2, IVNS1ABP, JUN, JUNB, JUND, KCND2, KIR3DL1, KPNA3, LCP1, LIMD2, LNPEP, MIOX, MTMR7, MYC, MYO10, NEDD8, NEK1, NKX2-1, NLGN1, NLGN4X, NR3C1, NTRK2, PAFAH1B1, PAICS, PHLPP1, PKIA, PLCB1, POLD3, PPAT, PPP6C, PRDM1, PRKD1, PRKN, PSMA2, PTGER3, PTPN11, PTPRS, RAB10, RAD23A, RAG2, RGS12, ROBO1, RP2, SCRIB, SDK1, SEMA3E, SHROOM3, SMARCD2, SNTB1, SPAG9, ST8SIA5, SUCLG1, THRB, TIAM1, TICRR, TJP2, TMED2, TNFRSF8, TPP2, TXNDC5, USP33, VAMP4, WNT2, WWOX, YY1, ZNF148 |



|     |       |                         |                                                                                                                                                                                                                                                                                                                                                                                                                                                                                                                                                                                                                                                                                                                                                                                                                                                                                                                                                    |
|-----|-------|-------------------------|----------------------------------------------------------------------------------------------------------------------------------------------------------------------------------------------------------------------------------------------------------------------------------------------------------------------------------------------------------------------------------------------------------------------------------------------------------------------------------------------------------------------------------------------------------------------------------------------------------------------------------------------------------------------------------------------------------------------------------------------------------------------------------------------------------------------------------------------------------------------------------------------------------------------------------------------------|
| WAS | other | 1.80 x 10 <sup>-6</sup> | ACTG1, AFAP1, ATF3, ATXN1, CD276, CEBPB, CLEC7A, CXCL9, ERAP1, ETS1, FOS, FOSL1, FOXA1, FOXA2, FOXM1, FOXP3, GADD45GIP1, GATA1, GNAQ, HNF1A, HNF1B, ICAM1, ICAM5, IL1R2, JUN, JUNB, KCND2, KIR3DL1, KLF15, LCP1, LEP, MYC, NR3C1, PAX5, PDCD4, PGR, PPP6C, PRDM1, PRKG1, PSMA2, PTPRS, QKI, RAB10, RAG2, RXRA, SEMA3E, SMARCD2, SNTB1, SORCS3, ST8SIA5, TBP, TGFB2, TIAM1, TICRR, TNFRSF8, UTRN, WT1, WWOX, ZNF148                                                                                                                                                                                                                                                                                                                                                                                                                                                                                                                                 |
| GP9 | other | 1.82 x 10 <sup>-6</sup> | ABCA4, AGA, ALDH4A1, ANKH, APBB2, ARHGEF9, ATF1, ATF3, ATF6, ATP6V0D2, ATP6V1H, BCAR3, BCL11B, BRF2, CACNB2, CD46, CD80, CDC42BPB, CHD9, CHI3L2, CHMP4A, CIT, CLEC7A, CLSTN2, CNOT4, COL14A1, DBP, DGKI, DHX9, EIF2B1, EPB41L5, ERAP1, ETS2, FAM171A1, FAM208A, FHIT, FMN1, FOS, FOXJ1, FOXO4, FOXP3, GABRA1, GATA1, GH1, GLCCI1, GNAI2, GNAQ, GRAP2, GRIK2, HDAC9, HIP1, HNF1A, HNF1B, ICAM1, IL1R2, IQGAP1, IRF2, IVNS1ABP, JUN, JUNB, JUND, KLF15, LIMD2, LNPEP, LRP2, LUC7L3, MAGEA11, MDGA1, MED12L, MIGA1, MIOX, MOG, MTMR7, MYC, NEDD8, NEK1, NLGN1, NLGN4X, NOD1, NR3C1, NTRK2, PAFAH1B1, PDCD4, PHLPP1, PKHD1, PKIA, PLAC1, PLCB1, PLCH1, POU1F1, PRKD1, PRKG1, PRKN, PTGER3, PTPN11, QKI, RAB3C, RAD23A, RAG2, RASGRF1, REST, RGS12, RPE65, RPL8, SCRIB, SELP, SEMA4A, SHROOM3, SMARCD2, SORCS3, SPAG9, ST3GAL5, ST8SIA5, STAT4, STC1, SUCLG1, SV2C, TFAP2A, THRB, TJP2, TMED2, TNFRSF8, TPP2, UBA6, USP33, UTRN, VTI1A, WNT2, YY1, ZEB1 |

|                                 |                             |                         |                                                                                                                                                                                                                                                                                                                                                                                                                                                                                                                                                                                                                                                                                                   |                                                                                                                                       |
|---------------------------------|-----------------------------|-------------------------|---------------------------------------------------------------------------------------------------------------------------------------------------------------------------------------------------------------------------------------------------------------------------------------------------------------------------------------------------------------------------------------------------------------------------------------------------------------------------------------------------------------------------------------------------------------------------------------------------------------------------------------------------------------------------------------------------|---------------------------------------------------------------------------------------------------------------------------------------|
| VEGFD                           | growth factor               | 1.84 × 10 <sup>-6</sup> | <i>ATF3, ATF6, CALR, CD46, CD80, CXCL9, ETS1, FHIT, FOSL1, FOXM1, GATA2, HES1, HNF4A, ICAM1, JUN, JUNB, JUND, KLF15, LEP, MYC, NFATC2, PGR, PRDM1, RAG1, RBP1, SORCS3, TBP, UTRN, VCL, WT1, ZEB1</i>                                                                                                                                                                                                                                                                                                                                                                                                                                                                                              |                                                                                                                                       |
| PDE3B                           | enzyme                      | 1.84 × 10 <sup>-6</sup> | <i>ABCA4, ABL1, ACER1, API5, ARHGEF9, ATF6, ATP6V0D2, ATP6V1H, BCAR3, BMP6, CALR, CAMK2D, CD80, CDC42BPB, CEBPA, CEBPB, CHMP4A, CIT, CLASP2, CNOT4, CREM, CSRP2, DAB1, DHX9, EPHA3, ETS2, EYA4, FAM171A1, FIGN, FMN1, FOS, FOXA2, GADD45GIP1, GATA1, GATA2, GGCT, GH1, GLCCI1, GNAQ, GRIA4, GRIK2, HNF1A, HNF1B, ICAM1, ICAM3, ICAM5, IL1R2, IQGAP1, IRF2, JUN, JUNB, KCND2, KPNA3, LCP1, LEP, LRP2, MAP3K3, MDGA1, MIGA1, MOG, MYC, NEK1, NKX2-1, NLGN1, NLGN4X, NOD1, NTRK2, PAX5, PDCD4, PFKP, PGR, PHLPP1, PIK3R1, PKHD1, PLAC1, PLCB1, PTPRS, RAG1, RAG2, RASGRF1, RPE65, RXRA, SEMA3E, SEMA4A, SLC38A3, SP1, SPAG9, SV2C, TFAP2A, THRB, TIAM1, TNFRSF8, TPP2, TRABD2B, USP33, UTRN, YY1</i> |                                                                                                                                       |
| Phe-Pro-Arg-chloromethyl ketone | chemical protease inhibitor | -                       | 1.85 × 10 <sup>-6</sup>                                                                                                                                                                                                                                                                                                                                                                                                                                                                                                                                                                                                                                                                           | <i>CEBPB, DBP, ELK1, ETS1, FHIT, FOSL1, FOXM1, GATA2, HES1, ICAM1, JUN, JUNB, LEP, MYC, NR3C1, PGR, POU1F1, RAG1, UTRN, WT1, ZEB1</i> |
| KCNA3                           | ion channel                 | 1.93 × 10 <sup>-6</sup> | <i>ACTG1, AHR, ALDH4A1, APBB2, ARHGAP24, ATF1, ATF6, ATP6V0D2, ATXN1, BMP6, CAMK2D, CAST, CD46, CEBPA, CIT, COL14A1, CXCL9, EIF2B1, EPHA3, ERAP1, ETS2, FHIT, FOSL1, FOXA1, FOXA2, FOXP3, GABRA1, GATA1, GATA2, GH1, GLCCI1, GNAI2, GRIK2, HIP1, HNF1B, HNF4A, ICAM1, ICAM5, IL1R2, JUNB, JUND, KCND2, LEP, LIMD2, LNPEP, LRP2,</i>                                                                                                                                                                                                                                                                                                                                                               |                                                                                                                                       |

|                   |                         |                         |                                                                                                                                                                                                                                                                                                                                                                                                                                                                                                        |
|-------------------|-------------------------|-------------------------|--------------------------------------------------------------------------------------------------------------------------------------------------------------------------------------------------------------------------------------------------------------------------------------------------------------------------------------------------------------------------------------------------------------------------------------------------------------------------------------------------------|
|                   |                         |                         | MAGEA11, MDGA1, MIGA1, MTMR7, MYC, NEDD8, NFATC2, NKX2-1, NR3C1, PAFAH1B1, PAX5, PDCD4, PFKP, PKHD1, PKIA, PRDM1, PRKD1, PRKG1, PSMA2, PTPN11, RAB3C, RAG1, RAG2, RASGRF1, RBL2, RBP1, RGS12, ROBO1, RPE65, RXRA, SCRIB, SELP, SEMA3E, SEMA4A, SHROOM3, SLC38A3, SMARCD2, SORCS3, SP1, ST8SIA5, STAT4, STC1, SUCLG1, SV2C, TBP, TCF7L2, THRB, TMED2, TNFRSF8, UTRN, VCL, WNT2                                                                                                                          |
| HDAC7             | transcription regulator | 1.93 × 10 <sup>-6</sup> | ABCA4, ARHGEF9, ATF3, ATP6V1H, CDC42BPB, CEBPB, CHMP4A, CIT, CLEC7A, CNOT4, FMN1, FOSL1, FOXA2, FOXM1, FOXO4, FOXP3, GATA2, GMPR, GNAQ, HES1, HNF1A, ICAM1, IQGAP1, IRF1, IVNS1ABP, JUNB, JUND, KCNN2, KPNA3, LEP, LIMD2, MAP3K3, MTMR7, MYC, NEK1, NKX2-1, NLGN1, NLGN4X, NR3C1, PDCD4, PGR, PLCB1, PPM1H, PRDM1, PTGER3, RAD23A, RBL2, ROBO1, SP1, SPAG9, TCF7L2, TFAP2A, TGFB2, THRB, TJP2, TPP2, WT1, ZEB1                                                                                         |
| REL/RELA/R<br>ELB | group                   | 1.95 × 10 <sup>-6</sup> | AGA, AHR, ATF1, ATF3, ATXN1, BMP6, BRF2, CAMK2D, CD46, CD80, CEBPB, CHI3L2, COL14A1, CREM, CXCL9, DBP, EPB41L5, ERAP1, FHIT, FOS, FOXA1, FOXO4, GATA2, GLCCI1, GNAQ, GRIA4, GRIK2, HIP1, HNF1B, HNF4A, ICAM1, IRF1, JUN, JUNB, JUND, KCND2, KIR3DL1, KPNA3, MDGA1, MED12L, MIGA1, MYC, NKX2-1, NR3C1, PAX5, PDCD4, PGR, PHLPP1, PIK3R1, PPP6C, PRDM1, RAB3C, RAG1, RAG2, RASGRF1, ROBO1, RPE65, RPL8, RXRA, SELP, SEMA4A, SORCS3, STAT4, STC1, SV2C, TBP, TFAP2A, TNFRSF8, UTRN, VCL, VTI1A, WT1, ZEB1 |

|                 |                        |                         |                                                                                                                                                                                                                                                                                                                                                                                                                                                                                                                                                                                                                                                                                                                                                                                                                                                                                                                                                    |
|-----------------|------------------------|-------------------------|----------------------------------------------------------------------------------------------------------------------------------------------------------------------------------------------------------------------------------------------------------------------------------------------------------------------------------------------------------------------------------------------------------------------------------------------------------------------------------------------------------------------------------------------------------------------------------------------------------------------------------------------------------------------------------------------------------------------------------------------------------------------------------------------------------------------------------------------------------------------------------------------------------------------------------------------------|
| CLEC7A          | transmembrane receptor | 1.96 x 10 <sup>-6</sup> | AGA, AHR, ATF3, ATXN1, BCAR3, CAMK2D, CD46, CD80, CEBPA, CEBPB, CREM, CXCL9, DBP, ELK1, ERAP1, FOS, FOXA1, FOXA2, HDAC9, HES1, HIP1, ICAM1, ICAM3, IRF1, IRF2, JUN, JUNB, JUND, KLF15, KPNA3, LEP, MED12L, MYC, NFATC2, NKX2-1, NR3C1, PRDM1, PTPRS, RAB10, RAB3C, RBP1, RXRA, SELP, SORCS3, SP1, STAT4, TBP, TNFRSF8, VTI1A, WT1                                                                                                                                                                                                                                                                                                                                                                                                                                                                                                                                                                                                                  |
| Glycoprotein 1B | complex                | 1.96 x 10 <sup>-6</sup> | ABCA4, AGA, ALDH4A1, ANKH, APBB2, ARHGEF9, ATF1, ATF3, ATF6, ATP6V0D2, ATP6V1H, BCAR3, BCL11B, BRF2, CACNB2, CD46, CD80, CDC42BPB, CHD9, CHI3L2, CHMP4A, CIT, CLEC7A, CLSTN2, CNOT4, COL14A1, DBP, DGKI, DHX9, EIF2B1, EPB41L5, ERAP1, ETS2, FAM171A1, FAM208A, FHIT, FMN1, FOS, FOXJ1, FOXO4, FOXP3, GABRA1, GATA1, GH1, GLCCI1, GNAI2, GNAQ, GRAP2, GRIK2, HDAC9, HIP1, HNF1A, HNF1B, ICAM1, IL1R2, IQGAP1, IRF2, IVNS1ABP, JUN, JUNB, JUND, KLF15, LIMD2, LNPEP, LRP2, LUC7L3, MAGEA11, MDGA1, MED12L, MIGA1, MIOX, MOG, MTMR7, MYC, NEDD8, NEK1, NLGN1, NLGN4X, NOD1, NR3C1, NTRK2, PAFAH1B1, PDCD4, PHLPP1, PKHD1, PKIA, PLAC1, PLCB1, PLCH1, POU1F1, PRKD1, PRKG1, PRKN, PTGER3, PTPN11, QKI, RAB3C, RAD23A, RAG2, RASGRF1, REST, RGS12, RPE65, RPL8, SCRIB, SELP, SEMA4A, SHROOM3, SMARCD2, SORCS3, SPAG9, ST3GAL5, ST8SIA5, STAT4, STC1, SUCLG1, SV2C, TFAP2A, THRB, TJP2, TMED2, TNFRSF8, TPP2, UBA6, USP33, UTRN, VTI1A, WNT2, YY1, ZEB1 |
| RGS4            | other                  | 1.97 x 10 <sup>-6</sup> | ATF3, ATF6, BCAR3, CALR, CAMK2D, CD46, CD80, CREM, CXCL9, DBP, FHIT, FOSL1, FOXM1, FOXP3, GATA2, GNAQ, HES1,                                                                                                                                                                                                                                                                                                                                                                                                                                                                                                                                                                                                                                                                                                                                                                                                                                       |

|        |                         |                         |                                                                                                                                                                                                                                                                                                                                                                                                                                                                                                                                                               |
|--------|-------------------------|-------------------------|---------------------------------------------------------------------------------------------------------------------------------------------------------------------------------------------------------------------------------------------------------------------------------------------------------------------------------------------------------------------------------------------------------------------------------------------------------------------------------------------------------------------------------------------------------------|
|        |                         |                         | <i>HNF4A, ICAM1, ICAM3, JUN, JUNB, JUND, KLF15, NFATC2, NR3C1, PGR, POU1F1, PRDM1, RAG1, RBP1, RXRA, SORCS3, TBP, UTRN, WT1</i>                                                                                                                                                                                                                                                                                                                                                                                                                               |
| WNT4   | cytokine                | 1.99 × 10 <sup>-6</sup> | <i>ATF3, CD46, CD80, CEBPA, CEBPB, CXCL9, FOS, GRIK2, HES1, HNF4A, ICAM1, JUN, JUNB, JUND, KLF15, LEP, MYC, NFATC2, PAX5, PRDM1, RBP1, RXRA, SORCS3, TBP, WT1</i>                                                                                                                                                                                                                                                                                                                                                                                             |
| AHRR   | other                   | 2.01 × 10 <sup>-6</sup> | <i>ABCA4, AHR, ARHGEF9, ATF3, ATF6, ATP6V1H, CALR, CD46, CD80, CDC42BPB, CEBPA, CHMP4A, CIT, CLEC7A, CNOT4, COL14A1, CREM, CTBP2, CXCL9, EPB41L5, FAM171A1, FHIT, FMN1, FOSL1, FOXA2, FOXM1, FOXO4, FOXP3, GADD45GIP1, GATA2, GMPR, GNAQ, HDAC9, HES1, HNF1A, ICAM3, IQGAP1, IRF1, IVNS1ABP, JUN, JUNB, JUND, KCNN2, KLF15, KPNA3, LEP, MAP3K3, MYC, NEK1, NFATC2, NLGN1, NLGN4X, NR3C1, PDCD4, PGR, PLCB1, POU1F1, PPM1H, PRDM1, PTGER3, QKI, RAG1, RBP1, ROBO1, SORCS3, SP1, SPAG9, TBP, TCF7L2, TFAP2A, TGFB2, THRB, TIAM1, TJP2, TPP2, UTRN, VCL, WT1</i> |
| ZNF366 | transcription regulator | 2.02 × 10 <sup>-6</sup> | <i>AHR, ATF1, ATF6, ATXN1, BMP6, BRF2, CALR, CD46, CEBPA, CEBPB, CHD9, CHI3L2, COL14A1, CXCL9, EP400, EPB41L5, ERAP1, FHIT, FOS, FOXA1, FOXA2, FOXO4, GABRA1, GATA1, GATA2, GLCCI1, GRIA4, GRIK2, HES1, HNF1A, HNF1B, HNF4A, ICAM1, ICAM3, ICAM5, IL1R2, IRF1, JUN, JUNB, KCND2, LIMD2, LRP2, MDGA1, MIGA1, MTMR7, MYC, MYO10, NFATC2, NKX2-1, NR3C1, PFKP, PGR, PHLPP1, PIK3R1, PPM1H, PRDM1, RAD23A, RAG1, RASGRF1, ROBO1, RPE65, RPL8, SELP,</i>                                                                                                           |

|          |                           |                         |                                                                                                                                                                                                                                                                                                                                                                                                                                                                                                                                                            |
|----------|---------------------------|-------------------------|------------------------------------------------------------------------------------------------------------------------------------------------------------------------------------------------------------------------------------------------------------------------------------------------------------------------------------------------------------------------------------------------------------------------------------------------------------------------------------------------------------------------------------------------------------|
|          |                           |                         | <i>SEMA4A, SORCS3, STC1, SV2C, TFAP2A, TNFRSF8, UTRN, VCL, WT1, ZEB1</i>                                                                                                                                                                                                                                                                                                                                                                                                                                                                                   |
| NECTIN2  | transmembrane receptor    | 2.02 × 10 <sup>-6</sup> | <i>ATF3, CD46, CD80, CEBPA, CXCL9, ELK1, FHIT, FOS, FOSL1, FOXM1, GATA2, HNF4A, ICAM1, JUNB, JUND, KLF15, NFATC2, PGR, PRDM1, RAG1, RBP1, RXRA, SORCS3, TBP, UTRN, WT1, ZEB1</i>                                                                                                                                                                                                                                                                                                                                                                           |
| IC87114  | chemical kinase inhibitor | 2.06 × 10 <sup>-6</sup> | <i>ATP6V0D2, CEBPB, ELK1, ETS1, FHIT, FOS, FOSL1, FOXM1, GATA2, HES1, ICAM1, JUN, LEP, MYC, PDCD4, PGR, PRDM1, RAG1, UTRN, WT1, ZEB1</i>                                                                                                                                                                                                                                                                                                                                                                                                                   |
| NEK10    | kinase                    | 2.13 × 10 <sup>-6</sup> | <i>AHR, ATF3, CEBPA, CEBPB, DBP, ELK1, FOS, FOSL1, JUN, JUNB, JUND, LEP, MYC, NR3C1, POU1F1, SP1</i>                                                                                                                                                                                                                                                                                                                                                                                                                                                       |
| TMEM184A | other                     | 2.16 × 10 <sup>-6</sup> | <i>ANKH, ATF3, BCAR3, CD46, CD80, CEBPA, CEBPB, CXCL9, FOS, FOSL1, FOXP3, GH1, HES1, HNF4A, ICAM1, ICAM3, JUN, JUNB, JUND, KLF15, LEP, MYC, NFATC2, PRDM1, RBP1, RXRA, SORCS3, TBP</i>                                                                                                                                                                                                                                                                                                                                                                     |
| ANO6     | ion channel               | 2.17 × 10 <sup>-6</sup> | <i>ABCA4, ALDH4A1, ANKH, APBB2, ARHGEF9, ATF1, ATF3, ATF6, ATP6V0D2, ATP6V1H, ATXN1, BCAR3, CACNB2, CALR, CD46, CDC42BPB, CHD9, CHMP4A, CIT, CLEC7A, CLSTN2, CNOT4, COL14A1, CSRP2, DBP, DGKI, DHX9, EIF2B1, ERAP1, ETS2, FAM171A1, FAM208A, FHIT, FMN1, FOS, FOXJ1, FOXO4, GABRA1, GATA1, GH1, GLCCI1, GNAI2, GNAQ, GRAP2, GRIK2, HDAC9, HIP1, HNF1A, HNF1B, HNF4A, ICAM3, IL1R2, IQGAP1, IRF2, IVNS1ABP, JUN, JUNB, JUND, KLF15, KPNA3, LNPEP, LRP2, MAGEA11, MDGA1, MIGA1, MIOX, NEDD8, NEK1, NKX2-1, NLGN1, NLGN4X, NR3C1, NTRK2, PAFAH1B1, PDCD4,</i> |

|           |                        |                         |                                                                                                                                                                                                                                                                                                                                                                                                                                                                                                                                                                                                                                                                                                   |
|-----------|------------------------|-------------------------|---------------------------------------------------------------------------------------------------------------------------------------------------------------------------------------------------------------------------------------------------------------------------------------------------------------------------------------------------------------------------------------------------------------------------------------------------------------------------------------------------------------------------------------------------------------------------------------------------------------------------------------------------------------------------------------------------|
|           |                        |                         | <i>PHLPP1, PIK3R1, PKHD1, PKIA, PLAC1, PLCB1, PLCH1, POU1F1, PRKD1, PRKG1, PRKN, PTGER3, PTPN11, PTPRS, QKI, RAB3C, RAD23A, RAG2, RASGRF1, REST, RGS12, RPE65, RXRA, SCRIB, SELP, SEMA4A, SHROOM3, SMARCD2, SORCS3, SPAG9, ST3GAL5, ST8SIA5, STAT4, STC1, SUCLG1, SV2C, TBP, TFAP2A, THRB, TJP2, TMED2, TNFRSF8, TPP2, UBA6, USP33, UTRN, WNT2, WT1, YY1, ZEB1</i>                                                                                                                                                                                                                                                                                                                                |
| VTCN1     | other                  | 2.19 × 10 <sup>-6</sup> | <i>BCAR3, CD80, CEBPB, ELK1, FHIT, FOSL1, FOXM1, FOXP3, GATA2, HES1, HNF4A, ICAM1, ICAM3, JUN, JUNB, JUND, LEP, MYC, PGR, PRDM1, RAG1, RBP1, RXRA, TBP, UTRN, WT1, ZEB1</i>                                                                                                                                                                                                                                                                                                                                                                                                                                                                                                                       |
| SLC39A4   | transporter            | 2.24 × 10 <sup>-6</sup> | <i>ACTG1, ALDH4A1, ANKH, APBB2, ARHGAP24, ATF1, ATF3, ATF6, ATXN1, BCAR3, BMP6, CALR, CAMK2D, CD46, CD80, CEBPA, CEBPB, CIT, COL14A1, CREM, CXCL9, EIF2B1, EPHA3, ERAP1, ETS2, FHIT, FOS, FOXA1, FOXM1, FOXO4, FOXP3, GATA1, GH1, GLCCI1, GRIK2, HDAC9, HIP1, HNF4A, ICAM1, ICAM3, ICAM5, IL1R2, IRF2, JUNB, JUND, KCND2, LEP, LNPEP, LRP2, MAGEA11, MDGA1, MIGA1, MYC, NEDD8, NFATC2, NR3C1, PAX5, PDCD4, PFKP, PGR, PKHD1, POU1F1, PRDM1, PRKD1, PRKG1, PSMA2, PTPN11, QKI, RAB3C, RAG1, RASGRF1, RBL2, RGS12, ROBO1, RPE65, RXRA, SCRIB, SELP, SEMA4A, SHROOM3, SLC38A3, SMARCD2, SORCS3, SP1, ST8SIA5, STAT4, STC1, SUCLG1, SV2C, TBP, TFAP2A, THRB, TIAM1, UPK1B, UTRN, VAMP4, WNT2, YY1</i> |
| TNFRSF10A | transmembrane receptor | 2.25 × 10 <sup>-6</sup> | <i>AHR, ATF3, CD46, CD80, CEBPA, CEBPB, CREM, CXCL9, DBP, ERAP1, FHIT, FOSL1, FOXM1, FOXO4, GATA2, HDAC9, HES1,</i>                                                                                                                                                                                                                                                                                                                                                                                                                                                                                                                                                                               |

|         |               |                         |                                                                                                                                                                                                                                                                                                                                                                                                                                                                                                                                                                                                                                                                                                                                                                                                                                                                                                                           |
|---------|---------------|-------------------------|---------------------------------------------------------------------------------------------------------------------------------------------------------------------------------------------------------------------------------------------------------------------------------------------------------------------------------------------------------------------------------------------------------------------------------------------------------------------------------------------------------------------------------------------------------------------------------------------------------------------------------------------------------------------------------------------------------------------------------------------------------------------------------------------------------------------------------------------------------------------------------------------------------------------------|
|         |               |                         | <i>HIP1, HNF4A, ICAM1, IRF1, JUN, JUNB, JUND, KLF15, LEP, NFATC2, NR3C1, PGR, POU1F1, PRDM1, RAB3C, RAG1, RBP1, RXRA, SELP, SORCS3, STAT4, TBP, UTRN, WT1, ZEB1</i>                                                                                                                                                                                                                                                                                                                                                                                                                                                                                                                                                                                                                                                                                                                                                       |
| SLC27A1 | transporter   | 2.33 × 10 <sup>-6</sup> | <i>AHR, ATF3, ATF6, BCL11B, CD80, CEBPA, CEBPB, DBP, ELK1, ETS1, FOS, FOSL1, FOXO4, FOXP3, ICAM1, IRF1, JUN, JUNB, JUND, KCND2, LEP, MOG, PFKP, PHLPP1, POU1F1, RBP1, SP1, TBP</i>                                                                                                                                                                                                                                                                                                                                                                                                                                                                                                                                                                                                                                                                                                                                        |
| EDN2    | growth factor | 2.49 × 10 <sup>-6</sup> | <i>ABCA4, ALDH4A1, ANKH, APBB2, ARHGEF9, ATF1, ATF3, ATP6V0D2, ATP6V1H, ATXN1, BCAR3, BMP6, BRF2, CACNB2, CAST, CDC42BPB, CHD9, CHI3L2, CHMP4A, CIT, CLEC7A, CLSTN2, CNOT4, COL14A1, DBP, DGKI, DHX9, EIF2B1, EPHA3, ERAP1, ETS1, ETS2, EYA4, F2RL3, FAM171A1, FAM208A, FHIT, FMN1, FOS, FOSL1, FOXJ1, FOXO4, FOXP3, GABRA1, GATA1, GH1, GLCCI1, GNAI2, GNAQ, GRAP2, GRIK2, HDAC9, HIP1, HNF1A, HNF1B, HNF4A, ICAM3, IL1R2, IQGAP1, IVNS1ABP, JUN, JUNB, JUND, KPNA3, LNPEP, MAGEA11, MDGA1, MIGA1, MIOX, NEDD8, NEK1, NKX2-1, NLGN1, NLGN4X, NTRK2, PAFAH1B1, PDCD4, PHLPP1, PKHD1, PKIA, PLAC1, PLCB1, PLCH1, POU1F1, PRKD1, PRKG1, PRKN, PTGER3, PTPN11, QKI, RAB3C, RAD23A, RAG2, RASGRF1, REST, RGS12, RPL8, RXRA, SCRIB, SEMA4A, SHROOM3, SMARCD2, SORCS3, SPAG9, ST3GAL5, ST8SIA5, STAT4, STC1, SUCLG1, SV2C, TBP, TFAP2A, THRB, TJP2, TMED2, TNFRSF8, TPP2, TXNDC5, UBA6, USP33, UTRN, VAMP4, WNT2, YY1, ZEB1</i> |



|      |             |                         |                                                                                                                                                                                                                                                                                                                                                                                                                                                                                                                                                                                                                                                                                                                                                                                                                                                                                                                                    |
|------|-------------|-------------------------|------------------------------------------------------------------------------------------------------------------------------------------------------------------------------------------------------------------------------------------------------------------------------------------------------------------------------------------------------------------------------------------------------------------------------------------------------------------------------------------------------------------------------------------------------------------------------------------------------------------------------------------------------------------------------------------------------------------------------------------------------------------------------------------------------------------------------------------------------------------------------------------------------------------------------------|
| CNN3 | other       | 2.49 x 10 <sup>-6</sup> | <p> <i>ABCA4, ALDH4A1, ANKH, APBB2, ARHGEF9, ATF1, ATF3, ATP6V0D2, ATP6V1H, ATXN1, BCAR3, BMP6, BRF2, CACNB2, CAST, CDC42BPB, CHD9, CHI3L2, CHMP4A, CIT, CLEC7A, CLSTN2, CNOT4, COL14A1, DBP, DGKI, DHX9, EIF2B1, EPHA3, ERAP1, ETS1, ETS2, EYA4, F2RL3, FAM171A1, FAM208A, FHIT, FMN1, FOS, FOXL1, FOXJ1, FOXO4, FOXP3, GABRA1, GATA1, GH1, GLCCI1, GNAI2, GNAQ, GRAP2, GRIK2, HDAC9, HIP1, HNF1A, HNF1B, HNF4A, ICAM3, IL1R2, IQGAP1, IVNS1ABP, JUN, JUNB, JUND, KPNA3, LNPEP, MAGEA11, MDGA1, MIGA1, MIOX, NEDD8, NEK1, NKX2-1, NLGN1, NLGN4X, NTRK2, PAFAH1B1, PDCD4, PHLPP1, PKHD1, PKIA, PLAC1, PLCB1, PLCH1, POU1F1, PRKD1, PRKG1, PRKN, PTGER3, PTPN11, QKI, RAB3C, RAD23A, RAG2, RASGRF1, REST, RGS12, RPL8, RXRA, SCRIB, SEMA4A, SHROOM3, SMARCD2, SORCS3, SPAG9, ST3GAL5, ST8SIA5, STAT4, STC1, SUCLG1, SV2C, TBP, TFAP2A, THRB, TJP2, TMED2, TNFRSF8, TPP2, TXNDC5, UBA6, USP33, UTRN, VAMP4, WNT2, YY1, ZEB1</i> </p> |
| APOH | transporter | 2.51 x 10 <sup>-6</sup> | <p> <i>ABCA4, AFAP1, AHR, ALDH4A1, ANXA7, APBB2, API5, ARHGEF9, ARID5B, ATF3, ATP6V1H, ATP7B, ATXN1, BCAR3, BRF2, CACNB2, CAMK2D, CAST, CD276, CD46, CD80, CDC42BPB, CEBPA, CEBPB, CHI3L2, CHMP4A, CIT, CLSTN2, CNOT4, CNTNAP2, CREM, CSRP2, CXCL9, DAB1, DBP, DHX9, EIF2B1, ELK1, EP400, EPB41L5, EPHA3, ERAP1, ETS1, F2RL3, FEM1B, FMN1, FOXA1, FOXJ1, FOXP3, GABRA1, GATA1, GBX1, GLCCI1, GMPR, GNAI2, GNAQ, HDAC9, HIP1, HNF1B, ICAM3, ICAM5, IL1R2,</i> </p>                                                                                                                                                                                                                                                                                                                                                                                                                                                                  |

|        |       |                         |                                                                                                                                                                                                                                                                                                                                                                                                                                                                                                                                                                                                                                                                                                                                                                                                             |
|--------|-------|-------------------------|-------------------------------------------------------------------------------------------------------------------------------------------------------------------------------------------------------------------------------------------------------------------------------------------------------------------------------------------------------------------------------------------------------------------------------------------------------------------------------------------------------------------------------------------------------------------------------------------------------------------------------------------------------------------------------------------------------------------------------------------------------------------------------------------------------------|
|        |       |                         | <p><i>IQGAP1, IRF1, IRF2, IVNS1ABP, JUN, JUNB, KCNN2, KLF15, KPNA3, LARGE1, LCP1, LEP, LUC7L3, MAGEA11, MAP3K3, MAPKAP1, MARCH3, MDGA1, MFAP3, MIGA1, MOG, MSS51, MYC, MYO10, NEDD8, NEK1, NFATC2, NLGN1, NLGN4X, NOD1, NSG1, PAFAH1B1, PAICS, PIK3R1, PLCB1, PLCH1, PPAT, PPM1H, PRDM1, PRKD1, PRKN, PSMA2, PTGER3, PTPN11, PTPRS, RAB10, RAB3C, RAD23A, RAG2, RASGRF1, RBP1, RGS12, RPL8, SCRIB, SELP, SHROOM3, SLC38A3, SMARCD2, SNTB1, SORCS3, SPAG9, ST3GAL5, ST8SIA5, STAT4, SUCLG1, SV2C, TBP, TFAP2A, THRB, TIAM1, TICRR, TJP2, TNFRSF8, UPK1B, USP33, WNT2, WWOX, YY1, ZNF148</i></p>                                                                                                                                                                                                              |
| PTGFRN | other | 2.53 × 10 <sup>-6</sup> | <p><i>ABCA4, ALDH4A1, ANKH, APBB2, ARHGEF9, ATF1, ATF3, ATP6V0D2, ATP6V1H, ATXN1, BCAR3, BMP6, BRF2, CACNB2, CAST, CDC42BPB, CHD9, CHI3L2, CHMP4A, CIT, CLEC7A, CLSTN2, CNOT4, COL14A1, DBP, DGKI, DHX9, EIF2B1, EPHA3, ERAP1, ETS1, ETS2, EYA4, F2RL3, FAM171A1, FAM208A, FHIT, FMN1, FOS, FOSL1, FOXJ1, FOXO4, FOXP3, GABRA1, GATA1, GH1, GLCCI1, GNAI2, GNAQ, GRAP2, GRIK2, HDAC9, HIP1, HNF1A, HNF1B, HNF4A, ICAM3, IL1R2, IQGAP1, IVNS1ABP, JUN, JUNB, JUND, KPNA3, LNPEP, MAGEA11, MDGA1, MIGA1, MIOX, NEDD8, NEK1, NKX2-1, NLGN1, NLGN4X, NTRK2, PAFAH1B1, PDCD4, PHLPP1, PKHD1, PKIA, PLAC1, PLCB1, PLCH1, POU1F1, PRKD1, PRKG1, PRKN, PTGER3, PTPN11, QKI, RAB3C, RAD23A, RAG2, RASGRF1, REST, RGS12, RPL8, RXRA, SCRIB, SEMA4A, SHROOM3, SMARCD2, SORCS3, SPAG9, ST3GAL5, ST8SIA5, STAT4,</i></p> |

|        |       |                         |                                                                                                                                                                                                                                                                                                                                                                                                                                                                                                                                                                                                                                                                                                                                                                                                                                                                                                                           |
|--------|-------|-------------------------|---------------------------------------------------------------------------------------------------------------------------------------------------------------------------------------------------------------------------------------------------------------------------------------------------------------------------------------------------------------------------------------------------------------------------------------------------------------------------------------------------------------------------------------------------------------------------------------------------------------------------------------------------------------------------------------------------------------------------------------------------------------------------------------------------------------------------------------------------------------------------------------------------------------------------|
|        |       |                         | <i>STC1, SUCLG1, SV2C, TBP, TFAP2A, THRB, TJP2, TMED2, TNFRSF8, TPP2, TXNDC5, UBA6, USP33, UTRN, VAMP4, WNT2, YY1, ZEB1</i>                                                                                                                                                                                                                                                                                                                                                                                                                                                                                                                                                                                                                                                                                                                                                                                               |
| COL5A3 | other | 2.53 x 10 <sup>-6</sup> | <i>ABCA4, ALDH4A1, ANKH, APBB2, ARHGEF9, ATF1, ATF3, ATP6V0D2, ATP6V1H, ATXN1, BCAR3, BMP6, BRF2, CACNB2, CAST, CDC42BPB, CHD9, CHI3L2, CHMP4A, CIT, CLEC7A, CLSTN2, CNOT4, COL14A1, DBP, DGKI, DHX9, EIF2B1, EPHA3, ERAP1, ETS1, ETS2, EYA4, F2RL3, FAM171A1, FAM208A, FHIT, FMN1, FOS, FOSL1, FOXJ1, FOXO4, FOXP3, GABRA1, GATA1, GH1, GLCCII, GNAI2, GNAQ, GRAP2, GRIK2, HDAC9, HIP1, HNF1A, HNF1B, HNF4A, ICAM3, IL1R2, IQGAP1, IVNS1ABP, JUN, JUNB, JUND, KPNA3, LNPEP, MAGEA11, MDGA1, MIGA1, MIOX, NEDD8, NEK1, NKX2-1, NLGN1, NLGN4X, NTRK2, PAFAH1B1, PDCD4, PHLPP1, PKHD1, PKIA, PLAC1, PLCB1, PLCH1, POU1F1, PRKD1, PRKG1, PRKN, PTGER3, PTPN11, QKI, RAB3C, RAD23A, RAG2, RASGRF1, REST, RGS12, RPL8, RXRA, SCRIB, SEMA4A, SHROOM3, SMARCD2, SORCS3, SPAG9, ST3GAL5, ST8SIA5, STAT4, STC1, SUCLG1, SV2C, TBP, TFAP2A, THRB, TJP2, TMED2, TNFRSF8, TPP2, TXNDC5, UBA6, USP33, UTRN, VAMP4, WNT2, YY1, ZEB1</i> |

|         |                                       |                         |                                                                                                                                                                                                                                                                                                                                                                                                                                                                                                                                                                                                                                                                                                                                                                                                                                                                                                                    |
|---------|---------------------------------------|-------------------------|--------------------------------------------------------------------------------------------------------------------------------------------------------------------------------------------------------------------------------------------------------------------------------------------------------------------------------------------------------------------------------------------------------------------------------------------------------------------------------------------------------------------------------------------------------------------------------------------------------------------------------------------------------------------------------------------------------------------------------------------------------------------------------------------------------------------------------------------------------------------------------------------------------------------|
| lewis Y | chemical -<br>endogenous<br>mammalian | 2.53 x 10 <sup>-6</sup> | ABCA4, ALDH4A1, ANKH, APBB2, ARHGEF9, ATF1, ATF3, ATP6V0D2, ATP6V1H, ATXN1, BCAR3, BMP6, BRF2, CACNB2, CAST, CDC42BPB, CHD9, CHI3L2, CHMP4A, CIT, CLEC7A, CLSTN2, CNOT4, COL14A1, DBP, DGKI, DHX9, EIF2B1, EPHA3, ERAP1, ETS1, ETS2, EYA4, F2RL3, FAM171A1, FAM208A, FHIT, FMN1, FOS, FOSL1, FOXJ1, FOXO4, FOXP3, GABRA1, GATA1, GH1, GLCCI1, GNAI2, GNAQ, GRAP2, GRIK2, HDAC9, HIP1, HNF1A, HNF1B, HNF4A, ICAM3, IL1R2, IQGAP1, IVNS1ABP, JUN, JUNB, JUND, KPNA3, LNPEP, MAGEA11, MDGA1, MIGA1, MIOX, NEDD8, NEK1, NKX2-1, NLGN1, NLGN4X, NTRK2, PAFAH1B1, PDCD4, PHLPP1, PKHD1, PKIA, PLAC1, PLCB1, PLCH1, POU1F1, PRKD1, PRKG1, PRKN, PTGER3, PTPN11, QKI, RAB3C, RAD23A, RAG2, RASGRF1, REST, RGS12, RPL8, RXRA, SCRIB, SEMA4A, SHROOM3, SMARCD2, SORCS3, SPAG9, ST3GAL5, ST8SIA5, STAT4, STC1, SUCLG1, SV2C, TBP, TFAP2A, THRB, TJP2, TMED2, TNFRSF8, TPP2, TXNDC5, UBA6, USP33, UTRN, VAMP4, WNT2, YY1, ZEB1 |
| GBA     | enzyme                                | 2.54 x 10 <sup>-6</sup> | ATF3, CD46, CD80, CEBPA, CEBPB, CXCL9, DBP, ETS1, FOS, ICAM1, JUN, JUNB, KLF15, LEP, MYC, NFATC2, NR3C1, POU1F1, PRDM1, RBP1, SORCS3, TBP                                                                                                                                                                                                                                                                                                                                                                                                                                                                                                                                                                                                                                                                                                                                                                          |

|         |                       |                         |                                                                                                                                                                                                                                                                                                                                                                                                                                                                                                                                                                                                                                                                                                                                                                                                                                                                                                                                    |
|---------|-----------------------|-------------------------|------------------------------------------------------------------------------------------------------------------------------------------------------------------------------------------------------------------------------------------------------------------------------------------------------------------------------------------------------------------------------------------------------------------------------------------------------------------------------------------------------------------------------------------------------------------------------------------------------------------------------------------------------------------------------------------------------------------------------------------------------------------------------------------------------------------------------------------------------------------------------------------------------------------------------------|
| PDE6G   | enzyme                | 2.56 x 10 <sup>-6</sup> | <p> <i>ABCA4, ALDH4A1, ANKH, APBB2, ARHGEF9, ATF1, ATF3, ATP6V0D2, ATP6V1H, ATXN1, BCAR3, BMP6, BRF2, CACNB2, CAST, CDC42BPB, CHD9, CHI3L2, CHMP4A, CIT, CLEC7A, CLSTN2, CNOT4, COL14A1, DBP, DGKI, DHX9, EIF2B1, EPHA3, ERAP1, ETS1, ETS2, EYA4, F2RL3, FAM171A1, FAM208A, FHIT, FMN1, FOS, FOSL1, FOXJ1, FOXO4, FOXP3, GABRA1, GATA1, GH1, GLCCI1, GNAI2, GNAQ, GRAP2, GRIK2, HDAC9, HIP1, HNF1A, HNF1B, HNF4A, ICAM3, IL1R2, IQGAP1, IVNS1ABP, JUN, JUNB, JUND, KPNA3, LNPEP, MAGEA11, MDGA1, MIGA1, MIOX, NEDD8, NEK1, NKX2-1, NLGN1, NLGN4X, NTRK2, PAFAH1B1, PDCD4, PHLPP1, PKHD1, PKIA, PLAC1, PLCB1, PLCH1, POU1F1, PRKD1, PRKG1, PRKN, PTGER3, PTPN11, QKI, RAB3C, RAD23A, RAG2, RASGRF1, REST, RGS12, RPL8, RXRA, SCRIB, SEMA4A, SHROOM3, SMARCD2, SORCS3, SPAG9, ST3GAL5, ST8SIA5, STAT4, STC1, SUCLG1, SV2C, TBP, TFAP2A, THRB, TJP2, TMED2, TNFRSF8, TPP2, TXNDC5, UBA6, USP33, UTRN, VAMP4, WNT2, YY1, ZEB1</i> </p> |
| IGF2BP2 | translation regulator | 2.56 x 10 <sup>-6</sup> | <p> <i>ABCA4, ALDH4A1, ANKH, APBB2, ARHGEF9, ATF1, ATF3, ATP6V0D2, ATP6V1H, ATXN1, BCAR3, BMP6, BRF2, CACNB2, CAST, CDC42BPB, CHD9, CHI3L2, CHMP4A, CIT, CLEC7A, CLSTN2, CNOT4, COL14A1, DBP, DGKI, DHX9, EIF2B1, EPHA3, ERAP1, ETS1, ETS2, EYA4, F2RL3, FAM171A1, FAM208A, FHIT, FMN1, FOS, FOSL1, FOXJ1, FOXO4, FOXP3, GABRA1, GATA1, GH1, GLCCI1, GNAI2, GNAQ, GRAP2, GRIK2, HDAC9, HIP1, HNF1A, HNF1B, HNF4A, ICAM3, IL1R2, IQGAP1,</i> </p>                                                                                                                                                                                                                                                                                                                                                                                                                                                                                   |

|              |                           |                         |                                                                                                                                                                                                                                                                                                                                                                                                                                                                                                 |
|--------------|---------------------------|-------------------------|-------------------------------------------------------------------------------------------------------------------------------------------------------------------------------------------------------------------------------------------------------------------------------------------------------------------------------------------------------------------------------------------------------------------------------------------------------------------------------------------------|
|              |                           |                         | <p><i>IVNS1ABP, JUN, JUNB, JUND, KPNA3, LNPEP, MAGEA11, MDGA1, MIGA1, MIOX, NEDD8, NEK1, NKX2-1, NLGN1, NLGN4X, NTRK2, PAFAH1B1, PDCD4, PHLPP1, PKHD1, PKIA, PLAC1, PLCB1, PLCH1, POU1F1, PRKD1, PRKG1, PRKN, PTGER3, PTPN11, QKI, RAB3C, RAD23A, RAG2, RASGRF1, REST, RGS12, RPL8, RXRA, SCRIB, SEMA4A, SHROOM3, SMARCD2, SORCS3, SPAG9, ST3GAL5, ST8SIA5, STAT4, STC1, SUCLG1, SV2C, TBP, TFAP2A, THRB, TJP2, TMED2, TNFRSF8, TPP2, TXNDC5, UBA6, USP33, UTRN, VAMP4, WNT2, YY1, ZEB1</i></p> |
| PI3K p85     | group                     | 2.59 × 10 <sup>-6</sup> | <p><i>ANKH, CEBPB, CXCL9, ELK1, ETS1, FHIT, FOSL1, FOXM1, FOXO4, FOXP3, GATA2, HES1, ICAM1, JUN, JUND, KLF15, LEP, MYC, PGR, RAG1, SELP, SP1, TGFB2, UTRN, WT1, ZEB1</i></p>                                                                                                                                                                                                                                                                                                                    |
| SK & F 86002 | chemical kinase inhibitor | 2.61 × 10 <sup>-6</sup> | <p><i>CD46, CD80, CEBPA, CEBPB, CLEC7A, CXCL9, DAB1, DBP, ETS1, FOS, FOSL1, FOXJ1, GATA1, GBX1, HES1, ICAM1, JUN, JUNB, KLF15, LCP1, LEP, MFAP3, MYC, NFATC2, NR3C1, PRDM1, RBP1, SORCS3, TBP, TGFB2, TNFRSF8, VAMP4</i></p>                                                                                                                                                                                                                                                                    |
| PRNP         | other                     | 2.63 × 10 <sup>-6</sup> | <p><i>AHR, ANKH, ATF6, ATP6V0D2, ATP6V1H, BCL11B, CALR, CD46, CD80, CLEC7A, CREM, CXCL9, DBP, ELK1, ERAP1, ETS1, ETS2, FOS, FOSL1, FOXA2, FOXP3, GATA2, GRIA4, HDAC9, HES1, HIP1, HNF1A, ICAM1, IRF1, JUN, JUNB, JUND, KLF15, LIMD2, MTMR7, MYC, NFATC2, NKX2-1, NOD1, NTRK2, POU1F1, PRDM1, RAB3C, RAD23A, RBP1, SORCS3, STAT4, TBP, TGFB2, WT1, ZEB1</i></p>                                                                                                                                  |

|        |                                 |                              |                                                                                                                                                                                                                                                                                                                                                                                                                                                                                                                                                                                                                                                                                                                                                              |
|--------|---------------------------------|------------------------------|--------------------------------------------------------------------------------------------------------------------------------------------------------------------------------------------------------------------------------------------------------------------------------------------------------------------------------------------------------------------------------------------------------------------------------------------------------------------------------------------------------------------------------------------------------------------------------------------------------------------------------------------------------------------------------------------------------------------------------------------------------------|
| PRMT2  | enzyme                          | 2.66 x 10 <sup>-6</sup>      | ABCA4, AHR, ARHGEF9, ATF3, ATP6V1H, CD80, CDC42BPB, CEBPA, CEBPB, CHMP4A, CIT, CLEC7A, CNOT4, CREM, CXCL9, DBP, ELK1, ERAP1, ETS1, FMN1, FOXM1, FOXO4, FOXP3, GATA1, GNAQ, HDAC9, HIP1, ICAM1, IQGAP1, IRF1, JUN, JUNB, JUND, KPNA3, LEP, MAP3K3, NEK1, NLGN1, NLGN4X, PDCD4, PGR, PLCB1, PRDM1, PTGER3, RAB3C, RBL2, ROBO1, SP1, SPAG9, STAT4, TCF7L2, TGFB2, THRB, TJP2, TPP2                                                                                                                                                                                                                                                                                                                                                                              |
| TPCA-1 | chemical<br>kinase<br>inhibitor | -<br>2.67 x 10 <sup>-6</sup> | ACTG1, AGA, ALDH4A1, APBB2, APPL2, ATF3, ATP6V0D2, BCAR3, BRF2, CAMK2D, CD46, CD80, CEBPA, CEBPB, CHI3L2, CIT, CLEC7A, COL14A1, CXCL9, DAB1, EIF2B1, ERAP1, ETS1, ETS2, FHIT, FOS, FOXA1, FOXJ1, FOXM1, FOXO4, FOXP3, GADD45GIP1, GATA1, GBX1, GLCCI1, GNAI2, GRIA4, HNF1A, HNF4A, HOXA5, ICAM1, ICAM3, ICAM5, IL1R2, IRF1, JUN, JUNB, KCND2, KLF15, KPNA3, LCP1, LEP, LIMD2, LRP2, LUC7L3, MED12L, MFAP3, MTMR7, NEDD8, NFATC2, NKX2-1, NR3C1, NTRK2, PAX5, PDCD4, PGR, PHLPP1, PIK3R1, POLD3, POU1F1, PPAT, PRDM1, PRKD1, PRKN, PTGER3, PTPN11, QKI, RAG1, RBP1, RGS12, ROBO1, RPE65, RPL8, RXRA, SCRIB, SHROOM3, SMARCD2, SORCS3, SP1, ST8SIA5, STC1, SUCLG1, SYNE1, TCF7L2, TFAP2A, THRB, TIAM1, TNFRSF8, UPK1B, UTRN, VAMP4, VCL, VTI1A, WNT2, WT1, YY1 |

|            |                                       |                         |                                                                                                                                                                                                                                                                                                                                                                                                                                                                                                                                                                                                                          |
|------------|---------------------------------------|-------------------------|--------------------------------------------------------------------------------------------------------------------------------------------------------------------------------------------------------------------------------------------------------------------------------------------------------------------------------------------------------------------------------------------------------------------------------------------------------------------------------------------------------------------------------------------------------------------------------------------------------------------------|
| NFkB1-CRel | complex                               | 2.68 x 10 <sup>-6</sup> | ACTG1, AGA, AHR, ALDH4A1, APBB2, ATF1, ATP6V0D2, ATXN1, BCL11B, BMP6, BRF2, CAMK2D, CD46, CD80, CEBPA, CHI3L2, COL14A1, CREM, CXCL9, DBP, DGKI, EIF2B1, EPHA3, ERAP1, FOS, FOSL1, GATA1, GATA2, GNAQ, GRIK2, HDAC9, HIP1, ICAM1, ICAM5, IL1R2, JUN, JUND, KCND2, KIR3DL1, KPNA3, MDGA1, MED12L, MIGA1, MYC, MYO10, NEDD8, NKX2-1, NR3C1, PAX5, PDCD4, PFKP, PGR, PHLPP1, PIK3R1, PPAT, PPP6C, PRDM1, PRKD1, PRKN, PSMA2, PTPN11, QKI, RAD23A, RAG2, RGS12, RPL8, RXRA, SCRIB, SELP, SEMA3E, SEMA4A, SHROOM3, SMARCD2, SORCS3, SP1, ST8SIA5, STC1, SUCLG1, SV2C, TBP, TCF7L2, TGFB2, TJP2, TNFRSF8, VCL, VTI1A, WNT2, WT1 |
| mir-221    | microRNA                              | 2.71 x 10 <sup>-6</sup> | CEBPB, ELK1, ETS1, FHIT, FOSL1, FOXM1, GATA2, HES1, IRF1, JUN, JUNB, LEP, MYC, PGR, PIK3R1, RAG1, TFAP2A, UTRN, WT1, ZEB1                                                                                                                                                                                                                                                                                                                                                                                                                                                                                                |
| hemin      | chemical -<br>endogenous<br>mammalian | 2.72 x 10 <sup>-6</sup> | AHR, API5, ATF6, BCL11B, BMP6, CD46, CEBPA, DBP, ELK1, EPHA3, ETS2, FHIT, FOXM1, FOXO4, FOXP3, GATA2, HDAC9, HES1, HNF4A, JUN, JUNB, JUND, KLF15, MAPKAP1, MIOX, NEK1, NFATC2, NR3C1, PDCD4, PGR, PKIA, POU1F1, PRDM1, PRKG1, RAG1, RBP1, RXRA, SORCS3, SP1, STC1, TBP, TFAP2A, TGFB2, UTRN, WT1, ZEB1                                                                                                                                                                                                                                                                                                                   |
| NCOR2      | transcription<br>regulator            | 2.74 x 10 <sup>-6</sup> | ABCA4, ACER1, AHR, ARHGEF9, ATF3, ATP6V1H, ATP7B, ATXN1, CAST, CD80, CDC42BPB, CEBPA, CHD9, CHMP4A, CLEC7A, CNOT4, ELK1, EP400, EPHA3, ETS2, EYA4, FHIT, FMN1, FOXA1, FOXA2, FOXM1, FOXO4, GABRA1, GATA1, GATA2, GGCT, GH1, GLCCI1, GNAQ, HNF1B, HNF4A,                                                                                                                                                                                                                                                                                                                                                                  |



|        |        |                         |                                                                                                                                                                                                                                                                                                                                                                                                                                                                                                                                                                                                                                                                                                                                                                                                                                                                                 |
|--------|--------|-------------------------|---------------------------------------------------------------------------------------------------------------------------------------------------------------------------------------------------------------------------------------------------------------------------------------------------------------------------------------------------------------------------------------------------------------------------------------------------------------------------------------------------------------------------------------------------------------------------------------------------------------------------------------------------------------------------------------------------------------------------------------------------------------------------------------------------------------------------------------------------------------------------------|
|        |        |                         | <i>IQGAP1, JUN, JUNB, JUND, KPNA3, LEP, LNPEP, MAP3K3, MYC, MYO10, NEK1, NLGN1, NLGN4X, NR3C1, PDCD4, PFKP, PGR, PHLPP1, PLAC1, PLCB1, PPM1H, PSMA2, PTGER3, RAG1, RBL2, ROBO1, RPE65, SELP, SPAG9, STAT4, STC1, TCF7L2, TFAP2A, THRB, TJP2, TNFRSF8, TPP2, UTRN, VCL, WNT2, WT1, ZEB1</i>                                                                                                                                                                                                                                                                                                                                                                                                                                                                                                                                                                                      |
| MIR124 | group  | 2.78 x 10 <sup>-6</sup> | <i>AHR, CD46, CD80, CEBPA, CEBPB, CXCL9, FOS, FOXA2, FOXM1, FOXP3, GRIA4, HNF1A, HNF1B, HNF4A, ICAM1, IQGAP1, JUNB, LEP, LRP2, MYC, NFATC2, PAX5, PGR, PRDM1, REST, RPE65, UTRN</i>                                                                                                                                                                                                                                                                                                                                                                                                                                                                                                                                                                                                                                                                                             |
| SKAP1  | kinase | 2.87 x 10 <sup>-6</sup> | <i>ABCA4, ALDH4A1, ANKH, APBB2, ARHGEF9, ATF1, ATF3, ATP6V0D2, ATP6V1H, ATXN1, BCAR3, BMP6, BRF2, CACNB2, CAST, CDC42BPB, CHD9, CHI3L2, CHMP4A, CIT, CLEC7A, CLSTN2, CNOT4, COL14A1, DBP, DGKI, DHX9, EIF2B1, EPHA3, ERAP1, ETS1, ETS2, EYA4, F2RL3, FAM171A1, FAM208A, FHIT, FMN1, FOS, FOSL1, FOXJ1, FOXO4, FOXP3, GABRA1, GATA1, GH1, GLCCI1, GNAI2, GNAQ, GRAP2, GRIK2, HDAC9, HIP1, HNF1A, HNF1B, HNF4A, ICAM3, IL1R2, IQGAP1, IVNS1ABP, JUN, JUNB, JUND, KPNA3, LNPEP, MAGEA11, MDGA1, MIGA1, MIOX, NEDD8, NEK1, NKX2-1, NLGN1, NLGN4X, NTRK2, PAFAH1B1, PDCD4, PHLPP1, PKHD1, PKIA, PLAC1, PLCB1, PLCH1, POU1F1, PRKD1, PRKG1, PRKN, PTGER3, PTPN11, QKI, RAB3C, RAD23A, RAG2, RASGRF1, REST, RGS12, RPL8, RXRA, SCRIB, SEMA4A, SHROOM3, SMARCD2, SORCS3, SPAG9, ST3GAL5, ST8SIA5, STAT4, STC1, SUCLG1, SV2C, TBP, TFAP2A, THRB, TJP2, TMED2, TNFRSF8, TPP2, TXNDC5,</i> |

|                                        |                             |                       |                                                                                                                                                                                                                                                                                                                                                                                                                                                                                                                                                                                                 |
|----------------------------------------|-----------------------------|-----------------------|-------------------------------------------------------------------------------------------------------------------------------------------------------------------------------------------------------------------------------------------------------------------------------------------------------------------------------------------------------------------------------------------------------------------------------------------------------------------------------------------------------------------------------------------------------------------------------------------------|
|                                        |                             |                       | <i>UBA6, USP33, UTRN, VAMP4, WNT2, YY1, ZEB1</i>                                                                                                                                                                                                                                                                                                                                                                                                                                                                                                                                                |
| ADRA1                                  | group                       | $2.94 \times 10^{-6}$ | <i>ATF3, ATF6, BCAR3, BCL11B, CALR, CD80, CEBPA, DBP, ETS1, FHIT, FOS, FOSL1, FOXA2, FOXO4, FOXP3, GATA2, HES1, ICAM1, ICAM3, JUN, JUNB, JUND, NR3C1, PAFAH1B1, PAX5, PDCD4, PGR, POU1F1, PRDM1, RAG1, RBP1, TBP, UPK1B, UTRN, WT1, ZEB1</i>                                                                                                                                                                                                                                                                                                                                                    |
| benzyloxycarbonyl-Leu-Leu-Leu aldehyde | chemical protease inhibitor | $3.01 \times 10^{-6}$ | <i>ABL1, AHR, ATF3, CEBPA, CEBPB, ETS1, FOS, FOXM1, HNF1A, ICAM1, JUN, MYC, NEDD8, NKX2-1, NR3C1, PDCD4, PGR, PRDM1, RXRA, SCRIB</i>                                                                                                                                                                                                                                                                                                                                                                                                                                                            |
| ITGA2                                  | transmembrane receptor      | $3.15 \times 10^{-6}$ | <i>ATF3, BCAR3, CALR, CD46, CD80, CEBPA, CEBPB, CREM, CXCL9, ETS1, FOS, FOXA2, FOXP3, HNF4A, ICAM1, ICAM3, IRF1, JUNB, JUND, KLF15, LEP, MYC, NFATC2, PGR, POU1F1, PRDM1, PRKG1, RBL2, RBP1, SELP, SORCS3, TBP, TIAM1, VCL, ZEB1</i>                                                                                                                                                                                                                                                                                                                                                            |
| NFAT (complex)                         | complex                     | $3.16 \times 10^{-6}$ | <i>ABCA4, ACER1, AHR, ALDH4A1, APBB2, ARHGEF9, ATF3, ATP6V0D2, ATP6V1H, ATXN1, CALR, CDC42BPB, CEBPB, CHMP4A, CIT, CLEC7A, CLSTN2, CNOT4, COL14A1, DBP, EIF2B1, ELK1, EPHA3, ETS1, EYA4, FHIT, FMN1, FOS, FOXA1, FOXA2, FOXO4, FOXP3, GGCT, GNAQ, HDAC9, HES1, HNF1A, HNF1B, HNF4A, ICAM1, IQGAP1, IRF1, JUN, JUND, KCND2, KPNA3, LEP, MAP3K3, MYC, NEDD8, NEK1, NLGN1, NLGN4X, PAX5, PFKP, PLAC1, PLCB1, PRDM1, PRKD1, PRKG1, PRKN, PTGER3, PTPN11, PTPRS, RAB10, RAD23A, RAG2, RGS12, RXRA, SCRIB, SELP, SHROOM3, SP1, SPAG9, SUCLG1, TBP, TCF7L2, THRB, TJP2, TPP2, UTRN, VCL, WNT2, WT1</i> |

|                |                         |                         |                                                                                                                                                                                                                                                                                                                                                                                                                                                                                                                                                                                                                                                                                                                                                                                                                                                                                                          |
|----------------|-------------------------|-------------------------|----------------------------------------------------------------------------------------------------------------------------------------------------------------------------------------------------------------------------------------------------------------------------------------------------------------------------------------------------------------------------------------------------------------------------------------------------------------------------------------------------------------------------------------------------------------------------------------------------------------------------------------------------------------------------------------------------------------------------------------------------------------------------------------------------------------------------------------------------------------------------------------------------------|
| CD3D           | transmembrane receptor  | 3.19 × 10 <sup>-6</sup> | ABCA4, ALDH4A1, APBB2, ARHGEF9, ATF1, ATF3, ATF6, ATP6V0D2, ATP6V1H, ATXN1, BCAR3, BCL11B, BRF2, CACNB2, CALR, CD46, CDC42BPB, CHD9, CHI3L2, CHMP4A, CIT, CLEC7A, CLSTN2, CNOT4, COL14A1, CSRP2, DBP, DGKI, DHX9, EIF2B1, ERAP1, ETS2, FAM171A1, FAM208A, FHIT, FMN1, FOS, FOXJ1, FOXO4, GABRA1, GATA1, GLCCI1, GNAI2, GNAQ, GRAP2, GRIK2, HDAC9, HIP1, HNF1A, HNF1B, HNF4A, ICAM3, IL1R2, IQGAP1, IRF2, IVNS1ABP, JUN, JUNB, JUND, KLF15, KPNA3, LNPEP, LRP2, MAGEA11, MDGA1, MIGA1, MIOX, NEDD8, NEK1, NKX2-1, NLGN1, NLGN4X, NR3C1, NTRK2, PAFAH1B1, PHLPP1, PIK3R1, PKHD1, PKIA, PLAC1, PLCB1, PLCH1, POU1F1, PRKD1, PRKG1, PRKN, PTGER3, PTPN11, PTPRS, QKI, RAB3C, RAD23A, RAG2, RASGRF1, REST, RGS12, RPE65, RPL8, SCRIB, SELP, SEMA4A, SHROOM3, SMARCD2, SORCS3, SPAG9, ST3GAL5, ST8SIA5, STAT4, STC1, SUCLG1, TBP, TFAP2A, THRB, TJP2, TMED2, TNFRSF8, TPP2, UBA6, USP33, UTRN, WNT2, YY1, ZEB1 |
| TCF7L1         | transcription regulator | 3.22 × 10 <sup>-6</sup> | ATF3, CEBPA, CEBPB, CXCL9, ELK1, ETS1, FHIT, FOSL1, FOXA2, FOXM1, FOXO4, GATA2, HES1, JUN, LEP, MYC, PGR, RAG1, TFAP2A, UTRN, WT1, ZEB1                                                                                                                                                                                                                                                                                                                                                                                                                                                                                                                                                                                                                                                                                                                                                                  |
| MSTN           | growth factor           | 3.24 × 10 <sup>-6</sup> | ATF3, BMP6, CD46, CD80, CEBPA, CEBPB, CXCL9, ELK1, FHIT, FOSL1, FOXM1, FOXP3, GATA2, HES1, HNF4A, ICAM1, JUN, JUNB, JUND, KLF15, LEP, NFATC2, PGR, PRDM1, RAG1, RBP1, RXRA, SORCS3, TBP, TGFB2, UTRN, WT1, ZEB1                                                                                                                                                                                                                                                                                                                                                                                                                                                                                                                                                                                                                                                                                          |
| NFAT (complex) | complex                 | 3.25 × 10 <sup>-6</sup> | AHR, ATF3, FOS, FOXA1, FOXA2, FOXP3, HNF1A, HNF1B, HNF4A, ICAM1, IRF1, JUN,                                                                                                                                                                                                                                                                                                                                                                                                                                                                                                                                                                                                                                                                                                                                                                                                                              |

|                                                |                           |                         |                                                                                                                                                                                                                                                                                                                                                                                                                                                                                                        |
|------------------------------------------------|---------------------------|-------------------------|--------------------------------------------------------------------------------------------------------------------------------------------------------------------------------------------------------------------------------------------------------------------------------------------------------------------------------------------------------------------------------------------------------------------------------------------------------------------------------------------------------|
|                                                |                           |                         | <i>KCND2, MYC, PRDM1, PTPRS, RAB10, UTRN</i>                                                                                                                                                                                                                                                                                                                                                                                                                                                           |
| N-(2-guanidinoethyl)-5-isoquinolinesulfonamide | chemical kinase inhibitor | 3.36 x 10 <sup>-6</sup> | <i>ADGRL3, AHR, ATF3, CEBPB, CREM, FOSL1, FOXA1, FOXA2, HNF1B, HNF4A, IRF1, JUNB, LEP, LRP2, MYC, PKHD1, POU1F1, VCL, WT1</i>                                                                                                                                                                                                                                                                                                                                                                          |
| SPAG9                                          | other                     | 3.38 x 10 <sup>-6</sup> | <i>ATF3, BCAR3, CD46, CD80, CEBPA, CEBPB, CXCL9, FOS, FOSL1, FOXK1, FOXP3, HES1, HNF4A, ICAM1, ICAM3, JUN, JUNB, JUND, KLF15, LEP, MYC, NFATC2, PRDM1, RBP1, RXRA, SORCS3, TBP</i>                                                                                                                                                                                                                                                                                                                     |
| RelA-CRel                                      | complex                   | 3.41 x 10 <sup>-6</sup> | <i>AGA, AHR, ATF1, ATF3, ATXN1, BMP6, BRF2, CAMK2D, CD46, CD80, CEBPB, CHI3L2, COL14A1, CREM, CXCL9, DBP, EPB41L5, ERAP1, FHIT, FOS, FOXA1, FOXO4, GATA2, GLCCI1, GNAQ, GRIA4, GRIK2, HIP1, HNF1B, HNF4A, ICAM1, IRF1, JUN, JUNB, JUND, KCND2, KIR3DL1, KPNA3, MDGA1, MED12L, MIGA1, MYC, NKX2-1, NR3C1, PAX5, PDCD4, PGR, PHLPP1, PIK3R1, PPP6C, PRDM1, RAB3C, RAG1, RAG2, RASGRF1, ROBO1, RPE65, RPL8, RXRA, SELP, SEMA4A, SORCS3, STC1, SV2C, TBP, TFAP2A, TNFRSF8, UTRN, VCL, VTI1A, WT1, ZEB1</i> |
| PITX1                                          | transcription regulator   | 3.48 x 10 <sup>-6</sup> | <i>ABCA4, ACER1, ARHGEF9, ATF3, ATP6V1H, ATXN1, BCAR3, CDC42BPB, CEBPB, CHMP4A, CIT, CLEC7A, CNOT4, EP400, EPHA3, ETS1, EYA4, FMN1, FOS, FOSL1, FOXA1, FOXO4, GABRA1, GGCT, GLCCI1, GNAQ, GRIA4, HES1, ICAM3, IQGAP1, IRF1, JUND, KPNA3, LEP, MAP3K3, MYC, MYO10, NEK1, NLGN1, NLGN4X, PDCD4, PFKP, PLAC1, PLCB1, PPM1H, PRDM1, PTGER3, RBL2, ROBO1, SP1, SPAG9, STC1, TBP, TCF7L2, TGFB2, THRB, TJP2, TPP2, VCL</i>                                                                                   |

|                                                              |                                 |                         |                                                                                                                                                                                                                                                                                                                                                                                                                                                                                                                                                                                                                                                                                                                                                                             |
|--------------------------------------------------------------|---------------------------------|-------------------------|-----------------------------------------------------------------------------------------------------------------------------------------------------------------------------------------------------------------------------------------------------------------------------------------------------------------------------------------------------------------------------------------------------------------------------------------------------------------------------------------------------------------------------------------------------------------------------------------------------------------------------------------------------------------------------------------------------------------------------------------------------------------------------|
| PDE4B                                                        | enzyme                          | 3.55 x 10 <sup>-6</sup> | CEBPB, ELK1, ETS1, FHIT, FOS, FOSL1, FOXM1, GATA2, HES1, ICAM1, JUN, LEP, MYC, PGR, RAG1, SELP, UTRN, WT1, ZEB1                                                                                                                                                                                                                                                                                                                                                                                                                                                                                                                                                                                                                                                             |
| TNFRSF11A                                                    | transmembrane receptor          | 3.56 x 10 <sup>-6</sup> | AHR, ATF3, BCAR3, BRF2, CD46, CD80, CEBPA, CEBPB, CHI3L2, CREM, CXCL9, DBP, ERAP1, FHIT, FOSL1, FOXO4, FOXP3, GATA2, HDAC9, HES1, HIP1, HNF4A, ICAM1, ICAM3, IRF1, JUN, JUNB, JUND, KLF15, LEP, NFATC2, NR3C1, PGR, PIK3R1, PRDM1, RAB3C, RAG1, RPL8, RXRA, SELP, SORCS3, STAT4, TBP, TFAP2A, TNFRSF8, UTRN, WT1, ZEB1                                                                                                                                                                                                                                                                                                                                                                                                                                                      |
| RALGDS                                                       | other                           | 3.87 x 10 <sup>-6</sup> | ATF3, CD80, CEBPB, ELK1, FHIT, FOSL1, FOXM1, FOXO4, GATA2, HES1, HNF4A, ICAM1, JUN, JUND, LEP, MYC, PGR, RAG1, RBP1, RXRA, TBP, UTRN, WT1, ZEB1                                                                                                                                                                                                                                                                                                                                                                                                                                                                                                                                                                                                                             |
| 5-oxo-6 <sup>-8-11-14</sup> -(e,z,z,z)-eicosatetraenoic acid | chemical - endogenous mammalian | 3.89 x 10 <sup>-6</sup> | ABCA4, ABLIM3, AFAP1, AHR, ALDH4A1, APBB2, ARHGEF9, ARID5B, ATF1, ATF3, ATF6, ATP6V0D2, ATP6V1H, ATXN1, BRF2, CACNB2, CALR, CD46, CD80, CDC42BPB, CHI3L2, CHMP4A, CIT, CLSTN2, CNOT4, CNTNAP2, COL14A1, CSRP2, CXCL9, DAB1, DBP, DGKI, DHX9, EIF2B1, ELK1, EP400, ETS1, F2RL3, FAM171A1, FHIT, FMN1, FOS, FOSL1, FOXA1, FOXJ1, FOXO4, GADD45GIP1, GATA1, GBX1, GMPR, GNAQ, HDAC9, HES1, HIP1, HNF1A, HNF1B, ICAM1, ICAM5, IL1R2, IQGAP1, IVNS1ABP, JUN, JUNB, JUND, KCNN2, KLF15, KPNA3, LARGE1, LCPI1, LEP, LIMD2, LUC7L3, MAGEA11, MAP3K3, MAPKAP1, MDGA1, MFAP3, MIGA1, MOG, MSS51, MTMR7, MYC, MYO10, NEDD8, NEK1, NFATC2, NFIA, NLGN1, NLGN4X, NOD1, NSG1, PAFAH1B1, PAICS, PKHD1, PKIA, PLAC1, PLCB1, PLCH1, PPM1H, PRDM1, PRKD1, PRKN, PSMA2, PTGER3, PTPN11, PTPRS, |

|                   |                        |                       |                                                                                                                                                                                                                                                               |
|-------------------|------------------------|-----------------------|---------------------------------------------------------------------------------------------------------------------------------------------------------------------------------------------------------------------------------------------------------------|
|                   |                        |                       | <i>RAB10, RAB3C, RAD23A, RAG2, RASGRF1, RBP1, RGS12, RPL8, SCRIB, SHROOM3, SLC38A3, SMARCD2, SORCS3, SPAG9, ST3GAL5, ST8SIA5, STC1, SUCLG1, SV2C, TBP, TFAP2A, THRB, TJP2, TMED2, TNFRSF8, UBA6, UPK1B, USP33, UTRN, VAMP4, WNT2, WWOX, YY1, ZEB1, ZNF148</i> |
| LDL-cholesterol   | complex                | $3.89 \times 10^{-6}$ | <i>ATF3, CD46, CD80, CEBPB, CXCL9, ETS1, FOS, FOSL1, FOXA2, GATA2, HES1, HNF1A, ICAM1, JUN, JUNB, KLF15, LEP, LIMD2, MTMR7, MYC, NFATC2, NKX2-1, PRDM1, RAD23A, RBP1, SORCS3, TBP, WT1, ZEB1</i>                                                              |
| TRAF1-TRAF2-TRAF3 | complex                | $3.91 \times 10^{-6}$ | <i>AHR, ANKH, ATF3, CD46, CD80, CEBPA, CEBPB, CREM, CXCL9, DBP, ELK1, ERAP1, FOS, FOSL1, GH1, HDAC9, HES1, HIP1, HNF4A, ICAM1, IRF1, JUN, JUNB, JUND, KLF15, LEP, MYC, NFATC2, PRDM1, RAB3C, RBP1, RXRA, SORCS3, STAT4, TBP</i>                               |
| ZNF622            | other                  | $3.91 \times 10^{-6}$ | <i>ATF3, CD46, CD80, CEBPB, CXCL9, FOS, FOSL1, GATA2, HES1, HNF4A, ICAM1, JUN, JUNB, JUND, KLF15, LEP, MYC, NFATC2, NR3C1, PRDM1, RBP1, RXRA, SORCS3, TBP, TNFRSF8</i>                                                                                        |
| MZB1              | other                  | $3.95 \times 10^{-6}$ | <i>AHR, ATF3, CD80, CEBPA, ELK1, ETS1, FOS, FOSL1, HES1, HNF4A, ICAM1, JUN, JUND, LEP, MYC, RBP1, RXRA, SP1, TBP</i>                                                                                                                                          |
| BTNL2             | transmembrane receptor | $4.24 \times 10^{-6}$ | <i>APPL2, ATP6V0D2, CD109, CEBPB, ELK1, ETS1, FHIT, FOS, FOSL1, FOXA2, FOXM1, FOXP3, GATA1, HES1, JUNB, LEP, MYC, MYO10, PAX5, PGR, PHLPP1, PRDM1, RAG1, RAG2, RBL2, UTRN, WT1, ZEB1</i>                                                                      |

|               |                        |                         |                                                                                                                                                                                                                                                                                                                                                                                                                                                                                                                                                                                                                                                                                                                                                                                                                                                                                                                                                                                                                                                                                                     |
|---------------|------------------------|-------------------------|-----------------------------------------------------------------------------------------------------------------------------------------------------------------------------------------------------------------------------------------------------------------------------------------------------------------------------------------------------------------------------------------------------------------------------------------------------------------------------------------------------------------------------------------------------------------------------------------------------------------------------------------------------------------------------------------------------------------------------------------------------------------------------------------------------------------------------------------------------------------------------------------------------------------------------------------------------------------------------------------------------------------------------------------------------------------------------------------------------|
| SIGIRR        | transmembrane receptor | 4.28 x 10 <sup>-6</sup> | <p>ABCA4, ACER1, ACTG1, AFAP1, AGA, AHR, ALDH4A1, APBB2, API5, ARHGEF9, ARID5B, ATF1, ATF3, ATF6, ATP7B, ATXN1, BCAR3, BCL11B, BRF2, CAST, CD276, CD80, CDC42BPB, CEBPA, CEBPB, CHI3L2, CHMP4A, CIT, CLEC7A, CLIP1, CLSTN2, CNOT4, CNTNAP2, CREM, CSRP2, CXCL9, DBP, DGKI, DHX9, EIF2B1, ELK1, EP400, EPB41L5, EPHA3, ERAP1, EYA4, F2RL3, FAM171A1, FEM1B, FMN1, FOS, FOXA1, FOXP3, GABRA1, GATA1, GH1, GMPR, GNAQ, GRIA4, GRIK2, HDAC9, HES1, HIP1, HNF1B, HNF4A, ICAM1, ICAM5, IQGAP1, IRF2, JUN, JUNB, JUND, KCND2, KPNA3, LARGE1, LCP1, LEP, LIMD2, LNPEP, LRP2, LUC7L3, MAP3K3, MAPKAP1, MARCH3, MED12L, MOG, MRPL13, MSS51, MTMR7, MYC, NEDD8, NEK1, NLGN1, NLGN4X, NOD1, NR3C1, NSG1, NTRK2, PAFAH1B1, PAICS, PFKP, PGR, PHLPP1, PIK3R1, PKIA, PLCB1, PLCB4, PPAT, PRDM1, PRKD1, PRKN, PSMA2, PTGER3, PTPN11, RAB3C, RBP1, RGS12, ROBO1, RPL8, RXRA, SBF1, SCRIB, SELP, SHROOM3, SIPA1L3, SLC38A3, SMARCD2, SNTB1, SPAG9, ST3GAL5, ST8SIA5, STAT4, STC1, SV2C, SYNE1, TBP, TFAP2A, THRB, TIAM1, TICRR, TJP2, TMED2, TNFRSF8, TUBGCP2, TXNDC5, USP33, VCL, VTI1A, WNT2, WWOX, YY1, ZNF148</p> |
| Nfat (family) | group                  | 4.28 x 10 <sup>-6</sup> | <p>AHR, ATF3, ATXN1, CD276, CD80, CLEC7A, FOSL1, FOXA1, FOXA2, FOXM1, FOXP3, GADD45GIP1, GATA1, HNF1A, HNF1B, HNF4A, ICAM1, IRF1, JUN, KCND2, LCP1, LEP, MYC, NFATC2, PRDM1, PTPRS, RAB10, SNTB1, TGFB2, TICRR, UTRN, ZEB1</p>                                                                                                                                                                                                                                                                                                                                                                                                                                                                                                                                                                                                                                                                                                                                                                                                                                                                      |

|                                        |                                 |                         |                                                                                                                                                                                                                                                                                                                                                                                           |
|----------------------------------------|---------------------------------|-------------------------|-------------------------------------------------------------------------------------------------------------------------------------------------------------------------------------------------------------------------------------------------------------------------------------------------------------------------------------------------------------------------------------------|
| WNT5A                                  | cytokine                        | 4.32 × 10 <sup>-6</sup> | AHR, ATF1, ATF6, BCAR3, BCL11B, BMP6, CALR, CD46, CD80, CEBPB, CREM, CXCL9, DBP, EPHA3, ERAP1, FHIT, FOSL1, FOXA2, FOXM1, FOXO4, GABRA1, GATA2, HDAC9, HIP1, HNF1A, HNF1B, ICAM3, IRF1, IRF2, JUND, KLF15, LCP1, LEP, LIMD2, LUC7L3, MAGEA11, MTMR7, MYC, NFATC2, NR3C1, POU1F1, PRDM1, PRKG1, PTPRS, RAB10, RAB3C, RAD23A, RAG1, RBP1, RXRA, SORCS3, SP1, STAT4, STC1, TGFB2, UTRN, ZEB1 |
| 1,2-dipalmitoyl-sn-glycero-3-phosphate | chemical - endogenous mammalian | 4.33 × 10 <sup>-6</sup> | AHR, ANKH, ATF6, ATP6V0D2, ATP6V1H, BCL11B, CD80, DBP, ELK1, ETS1, FHIT, FOSL1, FOXM1, FOXP3, GATA2, GRIK2, HES1, HNF4A, ICAM1, IRF1, JUN, JUNB, JUND, KCND2, KLF15, LEP, MOG, MRPL13, PDCD4, PFKP, PGR, POU1F1, PRKG1, PSMA2, RAG1, RBL2, RPL8, SLC38A3, TCF7L2, TGFB2, UTRN, WT1, ZEB1                                                                                                  |
| GADD45G                                | other                           | 4.45 × 10 <sup>-6</sup> | AFAP1, ATF3, CD46, CD80, CEBPA, CEBPB, CXCL9, DBP, ELK1, FOSL1, FOXM1, FOXO4, HES1, HNF4A, ICAM1, IRF1, JUN, JUNB, JUND, KLF15, LEP, NFATC2, NR3C1, PGR, POU1F1, PRDM1, QKI, RAG1, RBL2, RBP1, RXRA, SORCS3, TBP, TIAM1, TPP2, VAMP4, WWOX, ZNF148                                                                                                                                        |
| mir <sup>-21</sup> 8                   | microRNA                        | 4.49 × 10 <sup>-6</sup> | CEBPB, DBP, FOS, JUN, JUNB, LEP, MDGA1, MYC, NR3C1, POU1F1, ZEB1                                                                                                                                                                                                                                                                                                                          |
| TNFRSF10B                              | transmembrane receptor          | 4.58 × 10 <sup>-6</sup> | AHR, ATF3, CD46, CD80, CEBPA, CEBPB, CREM, CXCL9, DBP, ERAP1, FHIT, FOSL1, FOXM1, FOXO4, GATA2, HDAC9, HES1, HIP1, HNF4A, ICAM1, IRF1, JUN, JUNB, JUND, KLF15, LEP, NFATC2, NR3C1, PGR, POU1F1, PRDM1, RAB3C, RAG1, RBP1, RXRA, SELP, SORCS3, STAT4, TBP, UTRN, WT1, ZEB1                                                                                                                 |



|          |                                 |                              |                                                                                                                                                                                                                                                                                                                                                                                                                                                                                                                                                                                                                                                                                                                                                                                                                                                                                                                                                                     |
|----------|---------------------------------|------------------------------|---------------------------------------------------------------------------------------------------------------------------------------------------------------------------------------------------------------------------------------------------------------------------------------------------------------------------------------------------------------------------------------------------------------------------------------------------------------------------------------------------------------------------------------------------------------------------------------------------------------------------------------------------------------------------------------------------------------------------------------------------------------------------------------------------------------------------------------------------------------------------------------------------------------------------------------------------------------------|
| HACD3    | enzyme                          | 4.64 x 10 <sup>-6</sup>      | <p>ABCA4, ACTG1, AFAP1, AHR, ALDH4A1, APBB2, API5, ARHGEF9, ATF1, ATF3, ATF6, ATP6V0D2, ATP6V1H, ATP7B, ATXN1, BRF2, CAMK2D, CAST, CD276, CD46, CD80, CDC42BPB, CEBPB, CHI3L2, CHMP4A, CLEC7A, CNTNAP2, CREM, CXCL9, DBP, EIF2B1, ELK1, EPB41L5, EPHA3, ERAP1, ETS1, EYA4, F2RL3, FEM1B, FMN1, FOS, FOSL1, FOXA1, FOXO4, GABRA1, GADD45GIP1, GATA1, GH1, GLCCI1, GNAI2, GNAQ, GRIA4, GRIK2, HDAC9, HIP1, ICAM1, ICAM3, ICAM5, IL1R2, IQGAP1, IRF1, IRF2, IVNS1ABP, JUN, JUNB, JUND, KCND2, KLF15, KPNA3, LARGE1, LCP1, LEP, LIMD2, LNPEP, LRP2, LUC7L3, MAP3K3, MRPL13, MSS51, MTMR7, NEDD8, NEK1, NKX2-1, NLGN1, NLGN4X, NR3C1, NTRK2, P2RY12, PAFAH1B1, PAICS, PGR, PHLPP1, PIK3R1, PKIA, PLCB1, POU1F1, PPAT, PRDM1, PRKD1, PRKG1, PRKN, PSMA2, PTGER3, PTPN11, PTPRS, RAB10, RAB3C, RAD23A, RBP1, RGS12, ROBO1, RPL8, SCRIB, SEMA3E, SHROOM3, SIPA1L3, SNTB1, SPAG9, STAT4, SUCLG1, TBP, THRB, TIAM1, TICRR, TJP2, TMED2, TNFRSF8, VAMP4, WNT2, YY1, ZNF148</p> |
| CGP53716 | chemical<br>kinase<br>inhibitor | -<br>4.69 x 10 <sup>-6</sup> | <p>ABCA4, ACTG1, AFAP1, AHR, ALDH4A1, APBB2, API5, ARHGEF9, ATF1, ATF3, ATF6, ATP6V0D2, ATP6V1H, ATP7B, ATXN1, BRF2, CAMK2D, CAST, CD276, CD46, CD80, CDC42BPB, CEBPB, CHI3L2, CHMP4A, CLEC7A, CNTNAP2, CREM, CXCL9, DBP, EIF2B1, ELK1, EPB41L5, EPHA3, ERAP1, ETS1, EYA4, F2RL3, FEM1B, FMN1, FOS, FOSL1, FOXA1, FOXO4, GABRA1, GADD45GIP1, GATA1, GH1, GLCCI1, GNAI2, GNAQ, GRIA4, GRIK2, HDAC9, HIP1, ICAM1, ICAM3, ICAM5, IL1R2, IQGAP1,</p>                                                                                                                                                                                                                                                                                                                                                                                                                                                                                                                    |

|                    |                         |                       |                                                                                                                                                                                                                                                                                                                                                                                                                                                                                                                           |
|--------------------|-------------------------|-----------------------|---------------------------------------------------------------------------------------------------------------------------------------------------------------------------------------------------------------------------------------------------------------------------------------------------------------------------------------------------------------------------------------------------------------------------------------------------------------------------------------------------------------------------|
|                    |                         |                       | <i>IRF1, IRF2, IVNS1ABP, JUN, JUNB, JUND, KCND2, KLF15, KPNA3, LARGE1, LCP1, LEP, LIMD2, LNPEP, LRP2, LUC7L3, MAP3K3, MRPL13, MSS51, MTMR7, NEDD8, NEK1, NKX2-1, NLGN1, NLGN4X, NR3C1, NTRK2, P2RY12, PAFAH1B1, PAICS, PGR, PHLPP1, PIK3R1, PKIA, PLCB1, POU1F1, PPAT, PRDM1, PRKD1, PRKG1, PRKN, PSMA2, PTGER3, PTPN11, PTPRS, RAB10, RAB3C, RAD23A, RBP1, RGS12, ROBO1, RPL8, SCRIB, SEMA3E, SHROOM3, SIPA1L3, SNTB1, SPAG9, STAT4, SUCLG1, TBP, THRB, TIAM1, TICRR, TJP2, TMED2, TNFRSF8, VAMP4, WNT2, YY1, ZNF148</i> |
| JDP2               | transcription regulator | $4.8 \times 10^{-6}$  | <i>ATF3, ATXN1, CALR, CD46, CD80, CEBPA, CEBPB, CXCL9, EP400, ETS1, FOS, GABRA1, HES1, ICAM1, JUN, JUNB, JUND, KLF15, LEP, MYC, MYO10, NFATC2, PFKP, PPM1H, PRDM1, RBP1, SORCS3, STC1, TBP, VCL, ZEB1</i>                                                                                                                                                                                                                                                                                                                 |
| DDX17              | enzyme                  | $4.84 \times 10^{-6}$ | <i>ABCA4, ARHGEF9, ATF3, ATP6V1H, CDC42BPB, CEBPA, CEBPB, CHMP4A, CIT, CLEC7A, CNOT4, FMN1, FOS, FOSL1, FOXM1, FOXO4, FOXP3, GNAQ, ICAM1, IQGAP1, IRF1, JUN, JUNB, JUND, KPNA3, LEP, MAP3K3, MYC, NEK1, NLGN1, NLGN4X, PDCD4, PGR, PLCB1, PTGER3, RBL2, ROBO1, SP1, SPAG9, TCF7L2, TGFB2, THRB, TJP2, TPP2</i>                                                                                                                                                                                                            |
| serotonin receptor | group                   | $4.87 \times 10^{-6}$ | <i>ABCA4, ALDH4A1, ANKH, APBB2, API5, ARHGEF9, ATF3, ATF6, ATP6V0D2, ATP6V1H, ATXN1, BCAR3, BMP6, CACNB2, CALR, CD46, CDC42BPB, CHD9, CHMP4A, CIT, CLEC7A, CLSTN2, CNOT4, COL14A1, DBP, DGKI, DHX9, EIF2B1, EPHA3, ERAP1, ETS1, ETS2, FAM171A1, FAM208A, FHIT, FMN1, FOS, FOXJ1, FOXO4, FOXP3,</i>                                                                                                                                                                                                                        |

|       |        |                         |                                                                                                                                                                                                                                                                                                                                                                                                                                                                                                                                                                                                                                                                                                                                                                                             |
|-------|--------|-------------------------|---------------------------------------------------------------------------------------------------------------------------------------------------------------------------------------------------------------------------------------------------------------------------------------------------------------------------------------------------------------------------------------------------------------------------------------------------------------------------------------------------------------------------------------------------------------------------------------------------------------------------------------------------------------------------------------------------------------------------------------------------------------------------------------------|
|       |        |                         | <p>GABRA1, GATA1, GH1, GLCCI1, GNAI2, GNAQ, GRAP2, GRIK2, HDAC9, HIP1, HNF1A, HNF1B, HNF4A, ICAM3, IL1R2, IQGAP1, IRF2, IVNS1ABP, JUN, JUNB, JUND, KPNA3, LNPEP, LRP2, MAGEA11, MDGA1, MIGA1, MIOX, NEDD8, NEK1, NKX2-1, NLGN1, NLGN4X, NR3C1, PAFAH1B1, PDCD4, PHLPP1, PIK3R1, PKHD1, PKIA, PLAC1, PLCB1, PLCH1, POU1F1, PRKD1, PRKG1, PRKN, PTGER3, PTPN11, QKI, RAB3C, RAD23A, RAG2, RASGRF1, REST, RGS12, RPE65, SCRIB, SEMA4A, SHROOM3, SMARCD2, SORCS3, SPAG9, ST3GAL5, ST8SIA5, STAT4, STC1, SUCLG1, SV2C, TBP, TFAP2A, THRB, TJP2, TMED2, TNFRSF8, TPP2, UBA6, USP33, UTRN, WNT2, WT1, YY1, ZEB1</p>                                                                                                                                                                                |
| RIPK4 | kinase | 4.92 x 10 <sup>-6</sup> | <p>ABCA4, ACTG1, AFAP1, AHR, ALDH4A1, APBB2, API5, ARHGEF9, ATF1, ATF3, ATF6, ATP6V0D2, ATP6V1H, ATP7B, ATXN1, BRF2, CAMK2D, CAST, CD276, CD46, CD80, CDC42BPB, CEBPB, CHI3L2, CHMP4A, CLEC7A, CNTNAP2, CREM, CXCL9, DBP, EIF2B1, ELK1, EPB41L5, EPHA3, ERAP1, ETS1, EYA4, F2RL3, FEM1B, FMN1, FOS, FOSL1, FOXA1, FOXO4, GABRA1, GADD45GIP1, GATA1, GH1, GLCCI1, GNAI2, GNAQ, GRIA4, GRIK2, HDAC9, HIP1, ICAM1, ICAM3, ICAM5, IL1R2, IQGAP1, IRF1, IRF2, IVNS1ABP, JUN, JUNB, JUND, KCND2, KLF15, KPNA3, LARGE1, LCP1, LEP, LIMD2, LNPEP, LRP2, LUC7L3, MAP3K3, MRPL13, MSS51, MTMR7, NEDD8, NEK1, NKX2-1, NLGN1, NLGN4X, NR3C1, NTRK2, P2RY12, PAFAH1B1, PAICS, PGR, PHLPP1, PIK3R1, PKIA, PLCB1, POU1F1, PPAT, PRDM1, PRKD1, PRKG1, PRKN, PSMA2, PTGER3, PTPN11, PTPRS, RAB10, RAB3C,</p> |

|      |       |                         |                                                                                                                                                                                                                                                                                                                                                                                                                                                                                                                                                                                                                                                                                                                                                                                                                                                                                                                                                                            |
|------|-------|-------------------------|----------------------------------------------------------------------------------------------------------------------------------------------------------------------------------------------------------------------------------------------------------------------------------------------------------------------------------------------------------------------------------------------------------------------------------------------------------------------------------------------------------------------------------------------------------------------------------------------------------------------------------------------------------------------------------------------------------------------------------------------------------------------------------------------------------------------------------------------------------------------------------------------------------------------------------------------------------------------------|
|      |       |                         | <p><i>RAD23A, RBP1, RGS12, ROBO1, RPL8, SCRIB, SEMA3E, SHROOM3, SIPA1L3, SNTB1, SPAG9, STAT4, SUCLG1, TBP, THRB, TIAM1, TICRR, TJP2, TMED2, TNFRSF8, VAMP4, WNT2, YY1, ZNF148</i></p>                                                                                                                                                                                                                                                                                                                                                                                                                                                                                                                                                                                                                                                                                                                                                                                      |
| ELP1 | other | 4.92 x 10 <sup>-6</sup> | <p><i>ABCA4, ACTG1, AFAP1, AHR, ALDH4A1, APBB2, API5, ARHGEF9, ATF1, ATF3, ATF6, ATP6V0D2, ATP6V1H, ATP7B, ATXN1, BRF2, CAMK2D, CAST, CD276, CD46, CD80, CDC42BPB, CEBPB, CHI3L2, CHMP4A, CLEC7A, CNTNAP2, CREM, CXCL9, DBP, EIF2B1, ELK1, EPB41L5, EPHA3, ERAP1, ETS1, EYA4, F2RL3, FEM1B, FMN1, FOS, FOSL1, FOXA1, FOXO4, GABRA1, GADD45GIP1, GATA1, GH1, GLCC11, GNAI2, GNAQ, GRIA4, GRIK2, HDAC9, HIP1, ICAM1, ICAM3, ICAM5, IL1R2, IQGAP1, IRF1, IRF2, IVNS1ABP, JUN, JUNB, JUND, KCND2, KLF15, KPNA3, LARGE1, LCP1, LEP, LIMD2, LNPEP, LRP2, LUC7L3, MAP3K3, MRPL13, MSS51, MTMR7, NEDD8, NEK1, NKX2-1, NLGN1, NLGN4X, NR3C1, NTRK2, P2RY12, PAFAH1B1, PAICS, PGR, PHLPP1, PIK3R1, PKIA, PLCB1, POU1F1, PPAT, PRDM1, PRKD1, PRKG1, PRKN, PSMA2, PTGER3, PTPN11, PTPRS, RAB10, RAB3C, RAD23A, RBP1, RGS12, ROBO1, RPL8, SCRIB, SEMA3E, SHROOM3, SIPA1L3, SNTB1, SPAG9, STAT4, SUCLG1, TBP, THRB, TIAM1, TICRR, TJP2, TMED2, TNFRSF8, VAMP4, WNT2, YY1, ZNF148</i></p> |

|        |        |                         |                                                                                                                                                                                                                                                                                                                                                                                                                                                                                                                                                                                                                                                                                                                                                                                                                                                                              |
|--------|--------|-------------------------|------------------------------------------------------------------------------------------------------------------------------------------------------------------------------------------------------------------------------------------------------------------------------------------------------------------------------------------------------------------------------------------------------------------------------------------------------------------------------------------------------------------------------------------------------------------------------------------------------------------------------------------------------------------------------------------------------------------------------------------------------------------------------------------------------------------------------------------------------------------------------|
| CDKN1C | other  | 4.94 x 10 <sup>-6</sup> | ABCA4, ABLIM3, ACTG1, AFAP1, ALDH4A1, APBB2, ARHGEF9, ATF6, ATP6V0D2, ATP6V1H, ATP7B, ATXN1, BEND5, CAMK2D, CDC42BPB, CEBPA, CEBPB, CHD9, CHMP4A, CLEC7A, CLSTN2, CNTNAP2, COL14A1, CREM, CTBP2, EIF2B1, ELK1, EPHA3, ETS1, EYA4, F2RL3, FAM171A1, FMN1, FOS, FOSL1, FOXJ1, FOXM1, FOXO4, GADD45GIP1, GH1, GNAI2, GNAQ, GRIK2, HDAC9, HOXA5, ICAM5, IQGAP1, IVNS1ABP, JUN, JUND, KCND2, KPNA3, LEP, LIMD2, LUC7L3, MAGEA11, MAP3K3, MRPL13, MTMR7, MYO10, NEDD8, NEK1, NKX2-1, NLGN1, NLGN4X, NTNG1, P2RY12, PAFAH1B1, PAICS, PARD3, PGR, PIK3R1, PKIA, PLAC1, PLCB1, POU1F1, PPAT, PPM1H, PRKD1, PRKN, PSMA2, PTPN11, PTPRS, QKI, RAB10, RAD23A, RAG1, RBL2, RBP1, REST, RGS12, ROBO1, RPL8, SBF1, SCRIB, SEMA4A, SGCD, SHROOM3, SIPA1L3, SORCS3, SPAG9, ST3GAL5, STC1, SV2C, SYNE1, TBP, TGFB2, TIAM1, TJP2, TMED2, TNFRSF8, TPP2, WWOX, YY1, ZEB1, ZFP57, ZNF148, ZNF804A |
| LAMC1  | other  | 4.98 x 10 <sup>-6</sup> | AHR, ATF3, ATF6, BCL11B, CALR, CD80, CEBPA, CEBPB, DBP, ELK1, ETS1, ETS2, FOS, FOSL1, ICAM1, JUN, JUNB, JUND, MYC, POU1F1, SP1, TBP, TGFB2, ZEB1                                                                                                                                                                                                                                                                                                                                                                                                                                                                                                                                                                                                                                                                                                                             |
| UBE2M  | enzyme | 4.99 x 10 <sup>-6</sup> | ABCA4, ARHGEF9, ATF3, ATP6V1H, CD80, CDC42BPB, CEBPA, CEBPB, CHMP4A, CIT, CLEC7A, CNOT4, CXCL9, FMN1, FOS, FOXM1, FOXO4, FOXP3, GNAQ, GRIA4, IQGAP1, IRF1, JUN, JUNB, JUND, KPNA3, LEP, MAP3K3, NEK1, NFATC2, NLGN1, NLGN4X, PAX5, PDCD4, PGR, PLCB1, PTGER3, RAG2, RBL2, ROBO1, SELP, SP1,                                                                                                                                                                                                                                                                                                                                                                                                                                                                                                                                                                                  |

|         |                                             |                         |                                                                                                                                                                                                                                                                                                                                                                                                                                                                                                                                                                                                                                                                                                                                                                                                                                                                                                                                                                          |
|---------|---------------------------------------------|-------------------------|--------------------------------------------------------------------------------------------------------------------------------------------------------------------------------------------------------------------------------------------------------------------------------------------------------------------------------------------------------------------------------------------------------------------------------------------------------------------------------------------------------------------------------------------------------------------------------------------------------------------------------------------------------------------------------------------------------------------------------------------------------------------------------------------------------------------------------------------------------------------------------------------------------------------------------------------------------------------------|
|         |                                             |                         | <i>SPAG9, TCF7L2, TGFB2, THRB, TJP2, TPP2, WT1</i>                                                                                                                                                                                                                                                                                                                                                                                                                                                                                                                                                                                                                                                                                                                                                                                                                                                                                                                       |
| ammonia | chemical -<br>endogenous<br>mammalian       | 5.28 x 10 <sup>-6</sup> | <i>ABCA4, ABL1, ACER1, AFAP1, AGA, ANKH, ANXA7, API5, ARHGEF9, ATF1, ATF3, ATF6, ATP6V0D2, ATP6V1H, ATXN1, BCAR3, BCL11B, BMP6, BRF2, CAMK2D, CAST, CD80, CDC42BPB, CHI3L2, CHMP4A, CIT, CLEC7A, CLIP1, CNOT4, COL14A1, CSRP2, DAB1, DBP, DGKI, DHX9, EPHA3, ETS2, EYA4, F2RL3, FAM171A1, FEM1B, FHIT, FMN1, FOS, FOXA2, GABRA1, GATA1, GLCCI1, GMPR, GNAI2, GNAQ, GRIA4, GRIK2, HDAC9, HIP1, HNF1A, HNF1B, ICAM1, ICAM3, ICAM5, IQGAP1, IRF1, IRF2, IVNS1ABP, KCNIP4, KLF15, KLHL1, KPNA3, LARGE1, LCP1, LIMD2, LRP2, LUC7L3, MAP3K3, MARCH3, MDGA1, MED12L, MIGA1, MOG, MTMR7, MYC, MYO10, NEK1, NKX2-1, NLGN1, NLGN4X, NOD1, NR3C1, NTRK2, PAICS, PFKP, PGR, PLCB1, PLCB4, POLD3, POU1F1, PPAT, PPM1H, PRKG1, PTGER3, PTPN11, PTPRS, QKI, RAB3C, RAG1, RASGRF1, RPE65, RPL8, SBF1, SELP, SEMA3E, SEMA4A, SORCS3, SPAG9, STAT4, STC1, SUCLG1, SV2C, SYNE1, TCF7L2, THRB, TNFRSF8, TPP2, TUBGCP2, TXNDC5, USP33, UTRN, VAMP4, VTI1A, WWOX, YY1, ZEB1, ZFP57, ZNF148</i> |
| AHR     | ligand-<br>dependent<br>nuclear<br>receptor | 5.34 x 10 <sup>-6</sup> | <i>ABCA4, ARHGEF9, ATF3, ATF6, ATP6V1H, CALR, CD46, CD80, CDC42BPB, CEBPA, CHMP4A, CIT, CLEC7A, CNOT4, COL14A1, CREM, CTBP2, CXCL9, EPB41L5, FAM171A1, FHIT, FMN1, FOSL1, FOXA2, FOXM1, FOXO4, FOXP3, GADD45GIP1, GATA2, GMPR, GNAQ, HDAC9, HES1, HNF1A, ICAM3, IQGAP1, IRF1, IVNS1ABP, JUN, JUNB, JUND, KCNN2, KLF15, KPNA3, LEP, MAP3K3, MYC, NEK1, NFATC2, NLGN1,</i>                                                                                                                                                                                                                                                                                                                                                                                                                                                                                                                                                                                                 |

|                            |                            |                         |                                                                                                                                                                                                                                                                                                                                            |
|----------------------------|----------------------------|-------------------------|--------------------------------------------------------------------------------------------------------------------------------------------------------------------------------------------------------------------------------------------------------------------------------------------------------------------------------------------|
|                            |                            |                         | <i>NLGN4X, NR3C1, PDCD4, PGR, PLCB1, POU1F1, PPM1H, PRDM1, PTGER3, QKI, RAG1, RBP1, ROBO1, SORCS3, SP1, SPAG9, TBP, TCF7L2, TFAP2A, TGFB2, THRB, TIAM1, TJP2, TPP2, UTRN, VCL, WT1</i>                                                                                                                                                     |
| PRLHR                      | G-protein coupled receptor | 5.41 × 10 <sup>-6</sup> | <i>CEBPA, CEBPB, ELK1, ETS1, FHIT, FOS, FOSL1, FOXM1, FOXP3, GATA2, HES1, IRF1, JUN, KCND2, LEP, MOG, MYC, PFKP, PGR, PHLPP1, RAG1, UTRN, WT1, ZEB1</i>                                                                                                                                                                                    |
| NCOR2                      | transcription regulator    | 5.82 × 10 <sup>-6</sup> | <i>CD80, CEBPA, JUN, LEP, MYC, PGR</i>                                                                                                                                                                                                                                                                                                     |
| Atrial Natriuretic Peptide | group                      | 5.95 × 10 <sup>-6</sup> | <i>AHR, ATF3, ATP6V0D2, CEBPA, CEBPB, DBP, FOSL1, FOXA2, FOXP3, GATA2, HNF1A, HNF1B, HNF4A, JUNB, LEP, NR3C1, PAX5, POU1F1, PRDM1, PRKG1, RAG1, RAG2, RBL2, TGFB2, TIAM1, UTRN, VCL</i>                                                                                                                                                    |
| CALCB                      | other                      | 6.04 × 10 <sup>-6</sup> | <i>ATF6, CALR, CD80, CEBPA, CEBPB, CREM, ELK1, ETS1, FOS, FOSL1, ICAM1, JUN, JUNB, JUND, LEP, MYC, NR3C1, TBP, ZEB1</i>                                                                                                                                                                                                                    |
| PROTOR                     | group                      | 6.06 × 10 <sup>-6</sup> | <i>CEBPB, ELK1, ETS1, FHIT, FOS, FOSL1, FOXM1, FOXP3, GATA2, HES1, JUN, LEP, MYC, PGR, RAG1, UTRN, WT1, ZEB1</i>                                                                                                                                                                                                                           |
| NFATC4                     | transcription regulator    | 6.07 × 10 <sup>-6</sup> | <i>ABCA4, ACER1, ARHGEF9, ATF3, ATP6V1H, CDC42BPB, CEBPA, CEBPB, CHMP4A, CIT, CLEC7A, CNOT4, EPHA3, EYA4, FMN1, FOS, FOXA1, FOXO4, FOXP3, GGCT, GNAQ, ICAM1, IQGAP1, IRF1, JUN, JUNB, JUND, KCND2, KPNA3, LEP, MAP3K3, MYC, NEK1, NLGN1, NLGN4X, PDCD4, PLAC1, PLCB1, PTGER3, RBL2, ROBO1, SP1, SPAG9, TCF7L2, TGFB2, THRB, TJP2, TPP2</i> |
| DDX5                       | enzyme                     | 6.18 × 10 <sup>-6</sup> | <i>ABCA4, AHR, ARHGEF9, ATF3, ATP6V1H, CAST, CDC42BPB, CEBPA, CEBPB, CHD9, CHMP4A, CIT, CLEC7A, CNOT4, ETS2, FMN1, FOS, FOSL1, FOXA1, FOXM1, FOXO4, FOXP3, GATA1, GLCCI1, GNAQ,</i>                                                                                                                                                        |

|       |                            |                         |                                                                                                                                                                                                                                                                                                               |
|-------|----------------------------|-------------------------|---------------------------------------------------------------------------------------------------------------------------------------------------------------------------------------------------------------------------------------------------------------------------------------------------------------|
|       |                            |                         | <i>HNF1A, ICAM1, IQGAP1, IRF1, JUN, JUNB, JUND, KPNA3, LEP, MAP3K3, MYC, NEK1, NLGN1, NLGN4X, NR3C1, PAICS, PDCD4, PGR, PLCB1, PTGER3, RBL2, ROBO1, SP1, SPAG9, TCF7L2, TGFB2, THRB, TJP2, TPP2, WT1</i>                                                                                                      |
| GNG3  | enzyme                     | 6.22 x 10 <sup>-6</sup> | <i>AHR, CEBPA, CEBPB, CXCL9, DBP, ETS1, FOS, FOXP3, IRF1, JUN, JUNB, LEP, MYC, NR3C1, POU1F1, SELP, STAT4</i>                                                                                                                                                                                                 |
| WNT11 | other                      | 6.41 x 10 <sup>-6</sup> | <i>AHR, ATF3, ATF6, BCL11B, DBP, ETS1, FOS, FOXL1, GRIK2, ICAM1, IRF1, JUNB, MYC, PAX5, POU1F1, SP1, TGFB2, WT1</i>                                                                                                                                                                                           |
| DGAT1 | enzyme                     | 6.64 x 10 <sup>-6</sup> | <i>AHR, ATF3, ATF6, BCL11B, CD80, CEBPB, DBP, ELK1, ETS1, FOS, FOXL1, FOXO4, FOXP3, ICAM1, IRF1, JUN, JUNB, JUND, KCND2, LEP, MOG, PFKP, PHLPP1, POU1F1, RBP1, SP1, TBP</i>                                                                                                                                   |
| APBB1 | transcription regulator    | 6.65 x 10 <sup>-6</sup> | <i>ABCA4, ARHGEF9, ATF3, ATP6V1H, CDC42BPB, CEBPA, CEBPB, CHMP4A, CIT, CLEC7A, CNOT4, FMN1, FOS, FOXM1, FOXO4, FOXP3, GNAQ, HES1, ICAM1, IQGAP1, IRF1, JUN, JUNB, JUND, KPNA3, LEP, MAP3K3, MYC, NEK1, NLGN1, NLGN4X, PDCD4, PGR, PLCB1, PTGER3, RBL2, ROBO1, SP1, SPAG9, TCF7L2, TGFB2, THRB, TJP2, TPP2</i> |
| GHSR  | G-protein coupled receptor | 6.66 x 10 <sup>-6</sup> | <i>ATF3, CD80, CEBPB, CREM, ELK1, ETS1, FHIT, FOXL1, FOXM1, GATA2, HES1, ICAM1, ICAM5, JUN, LEP, MYC, PGR, RAG1, UTRN, WT1, ZEB1</i>                                                                                                                                                                          |
| PSMC5 | transcription regulator    | 6.95 x 10 <sup>-6</sup> | <i>ABCA4, ACER1, ARHGEF9, ATF3, ATP6V1H, CDC42BPB, CEBPA, CEBPB, CHMP4A, CIT, CLEC7A, CNOT4, EPHA3, EYA4, FMN1, FOS, FOXA1, FOXO4, FOXP3, GGCT, GNAQ, HNF1B, ICAM1, IQGAP1, IRF1, JUN, JUNB, JUND, KPNA3, LEP, MAP3K3, MYC, NEK1, NLGN1, NLGN4X, PDCD4, PLAC1, PLCB1,</i>                                     |



|          |                            |                         |                                                                                                                                                                                                                                                                                                                                                                                                                                                                                                                                                                                                                                                                                                                                                                                                                                                                                                                                                            |
|----------|----------------------------|-------------------------|------------------------------------------------------------------------------------------------------------------------------------------------------------------------------------------------------------------------------------------------------------------------------------------------------------------------------------------------------------------------------------------------------------------------------------------------------------------------------------------------------------------------------------------------------------------------------------------------------------------------------------------------------------------------------------------------------------------------------------------------------------------------------------------------------------------------------------------------------------------------------------------------------------------------------------------------------------|
|          |                            |                         | <i>PTGER3, RBL2, ROBO1, SP1, SPAG9, TCF7L2, TGFB2, THRB, TJP2, TPP2</i>                                                                                                                                                                                                                                                                                                                                                                                                                                                                                                                                                                                                                                                                                                                                                                                                                                                                                    |
| PDIA3    | peptidase                  | 6.98 x 10 <sup>-6</sup> | <i>AHR, ATF3, ATF6, BCL11B, CEBPA, DBP, FOS, FOSL1, FOXP3, ICAM1, JUN, JUNB, LCP1, LEP, MOG, PDCD4, PFKP, PHLPP1, POU1F1, SELP, SP1</i>                                                                                                                                                                                                                                                                                                                                                                                                                                                                                                                                                                                                                                                                                                                                                                                                                    |
| Selectin | group                      | 6.99 x 10 <sup>-6</sup> | <i>ABCA4, AFAP1, ALDH4A1, ANKH, ANKS1B, APBB2, ARHGEF9, ATF1, ATF6, ATP11B, ATP6V0D2, ATP6V1H, ATXN1, BCAR3, BRF2, CAMK2D, CDC42BPB, CEBPB, CHI3L2, CHMP4A, CIT, CLEC7A, CLIP1, CLSTN2, CNOT4, CNTNAP2, COL14A1, CSRP2, DAB1, DBP, DHX9, EIF2B1, ELK1, EP400, EPHA3, ETS2, FEM1B, FHIT, FMN1, FOS, FOXA1, FOXJ1, FOXO4, GADD45GIP1, GH1, GLCC1, GMPR, GNAI2, GNAQ, GRIA4, GRIK2, HDAC9, HIP1, HNF1A, HNF1B, HNF4A, HOXA5, IL1R2, IQGAP1, IRF1, IRF2, IVNS1ABP, JUN, JUNB, KCND2, KCNN2, KIR3DL1, KPNA3, LCP1, LEP, LRP2, LUC7L3, MAP3K3, MDGA1, MIGA1, MIOX, MYC, MYO10, NEDD8, NEK1, NLGN1, NLGN4X, NR3C1, PAFAH1B1, PAICS, PHLPP1, PKIA, PLA2R1, PLCB1, POU1F1, PPAT, PPM1H, PRKD1, PRKN, PTGER3, PTPN11, PTPRS, RAB3C, RAD23A, RAG1, RASGRF1, RGS12, RPL8, SCRIB, SEMA4A, SHROOM3, SMARCD2, SPAG9, ST3GAL5, ST8SIA5, STAT4, STC1, SUCLG1, SV2C, TFAP2A, TFCP2, THRB, TIAM1, TJP2, TMED2, TNFRSF8, TPP2, USP33, UTRN, WNT2, WT1, WWOX, ZFP57, ZNF148</i> |
| APLNR    | G-protein coupled receptor | 7.11 x 10 <sup>-6</sup> | <i>ATF3, CD80, CEBPB, ELK1, ETS1, FHIT, FOS, FOSL1, FOXM1, GATA2, HES1, ICAM1, JUN, LEP, MYC, PGR, RAG1, UTRN, WT1, ZEB1</i>                                                                                                                                                                                                                                                                                                                                                                                                                                                                                                                                                                                                                                                                                                                                                                                                                               |

|                                                |                                 |                         |                                                                                                                                                                                                                                                                                                                                                                                                                                                                                                                                                                                                                                                                                                                                                                                                                                                                                                                                                                                     |
|------------------------------------------------|---------------------------------|-------------------------|-------------------------------------------------------------------------------------------------------------------------------------------------------------------------------------------------------------------------------------------------------------------------------------------------------------------------------------------------------------------------------------------------------------------------------------------------------------------------------------------------------------------------------------------------------------------------------------------------------------------------------------------------------------------------------------------------------------------------------------------------------------------------------------------------------------------------------------------------------------------------------------------------------------------------------------------------------------------------------------|
| PIK3R5                                         | kinase                          | 7.11 × 10 <sup>-6</sup> | <i>CEBPA, CEBPB, CXCL9, ELK1, FHIT, FOS, FOSL1, FOXM1, GATA2, HES1, IRF1, JUN, LEP, MYC, PGR, RAG1, SELP, UTRN, WT1, ZEB1</i>                                                                                                                                                                                                                                                                                                                                                                                                                                                                                                                                                                                                                                                                                                                                                                                                                                                       |
| IL3RA                                          | transmembrane receptor          | 7.18 × 10 <sup>-6</sup> | <i>ABCA4, ABL1, AFAP1, AHR, ALDH4A1, APBB2, API5, ARHGEF9, ATF1, ATP6V0D2, ATP6V1H, ATXN1, BCAR3, BRF2, CAMK2D, CD46, CD80, CDC42BPB, CEBPA, CEBPB, CHI3L2, CHMP4A, CIT, CLEC7A, CLSTN2, CNOT4, CNTNAP2, COL14A1, CPNE5, CXCL9, DAB1, DGKI, DHX9, EIF2B1, ELK1, EPHA3, ETS1, ETS2, EXOC4, FAM171A1, FMN1, FOSL1, FOXA1, FOXM1, GABRA1, GATA1, GH1, GLCCI1, GNAI2, GNAQ, GRIA4, HNF1B, HOXA5, ICAM1, ICAM3, ICAM5, IQGAP1, IRF1, IVNS1ABP, JUN, JUNB, KLF15, KPNA3, LEP, LIMD2, LNPEP, LRP2, MAP3K3, MDGA1, MIGA1, MOG, MTMR7, MYC, MYO10, NEDD8, NEK1, NFATC2, NLGN1, NLGN4X, NOD1, PAFAH1B1, PAICS, PAX5, PGR, PKIA, PLCB1, PLCB4, POLD3, POU1F1, PPAT, PRDM1, PRKD1, PRKN, PSMA2, PTGER3, PTPN11, PTPRS, QKI, RAB10, RAG1, RAG2, RASGRF1, RBP1, RGS12, RP2, RPE65, SCRIB, SEMA4A, SHROOM3, SIPA1L3, SMARCD2, SORCS3, SPAG9, ST3GAL5, ST8SIA5, STC1, SUCLG1, SV2C, TFAP2A, THRB, TJP2, TMED2, TPP2, UBA6, UPK1B, USP33, UTRN, VAMP4, WNT2, WT1, WWOX, YY1, ZEB1, ZFP57, ZNF148</i> |
| 1-phosphatidyl-D-myo-inositol 4,5-bisphosphate | chemical - endogenous mammalian | 7.54 × 10 <sup>-6</sup> | <i>CEBPB, ELK1, ETS1, FHIT, FOS, FOSL1, FOXM1, GATA2, HES1, ICAM1, JUN, LEP, MYC, PGR, RAG1, UTRN, WT1, ZEB1</i>                                                                                                                                                                                                                                                                                                                                                                                                                                                                                                                                                                                                                                                                                                                                                                                                                                                                    |

|         |                             |                         |                                                                                                                                                                                                                                                                                                           |
|---------|-----------------------------|-------------------------|-----------------------------------------------------------------------------------------------------------------------------------------------------------------------------------------------------------------------------------------------------------------------------------------------------------|
| MTORC2  | complex                     | 7.68 x 10 <sup>-6</sup> | AHR, ANKH, ATF6, ATP6V0D2, ATP6V1H, BCL11B, DBP, ELK1, ETS1, FHIT, FOSL1, FOXM1, FOXP3, GATA2, GRIK2, HES1, HNF4A, IRF1, JUN, JUNB, JUND, KCND2, KLF15, LEP, MOG, MRPL13, PDCD4, PFKP, PGR, POU1F1, PRKG1, PSMA2, RAG1, RBL2, RPL8, SLC38A3, TCF7L2, TGFB2, UTRN, WT1, ZEB1                               |
| PIP5K1B | kinase                      | 7.69 x 10 <sup>-6</sup> | ATF3, BCAR3, CD80, CEBPB, ELK1, ETS1, FHIT, FOSL1, FOXM1, FOXP3, GATA2, HNF4A, ICAM3, JUNB, JUND, LEP, PGR, PRDM1, RAG1, RBP1, RXRA, TBP, UTRN, WT1, ZEB1                                                                                                                                                 |
| E64d    | chemical protease inhibitor | 7.78 x 10 <sup>-6</sup> | AHR, ATF3, ATF6, BCL11B, BMP6, CD46, CD80, CEBPA, CEBPB, CXCL9, DBP, FOSL1, FOXP3, HES1, HNF4A, ICAM1, JUN, JUND, KLF15, LEP, NFATC2, POU1F1, PRDM1, RBP1, RXRA, SORCS3, SP1, TBP                                                                                                                         |
| SLC9A1  | ion channel                 | 7.83 x 10 <sup>-6</sup> | ATF3, CD46, CD80, CEBPA, CEBPB, CXCL9, ETS1, FOS, ICAM1, IRF1, JUN, JUNB, KLF15, LEP, MYC, NFATC2, PRDM1, RBP1, SORCS3, TBP                                                                                                                                                                               |
| CSNK1G2 | kinase                      | 7.86 x 10 <sup>-6</sup> | ABCA4, ARHGEF9, ATF3, ATP6V1H, CDC42BPB, CEBPA, CEBPB, CHMP4A, CIT, CLEC7A, CNOT4, FMN1, FOS, FOXM1, FOXO4, FOXP3, GNAQ, ICAM1, IQGAP1, IRF1, JUN, JUNB, JUND, KPNA3, LEP, MAP3K3, NEK1, NLGN1, NLGN4X, PAX5, PDCD4, PGR, PIK3R1, PLCB1, PTGER3, RBL2, ROBO1, SP1, SPAG9, TCF7L2, TGFB2, THRB, TJP2, TPP2 |
| CD84    | other                       | 7.87 x 10 <sup>-6</sup> | ABCA4, ABL1, ACTG1, AFAP1, AGA, AHR, ALDH4A1, APBB2, API5, ARHGEF9, ATF3, ATP6V0D2, ATP6V1H, ATP7B, BCAR3, BCL11B, BRF2, CAMK2D, CD276, CD80, CDC42BPB, CEBPB, CHI3L2, CHMP4A, CIT, CNOT4, CREM, CSRP2, CXCL9, DAB1, DBP,                                                                                 |

|                     |                                 |                         |                                                                                                                                                                                                                                                                                                                                                                                                                                                                                                                                                                                                                                                                                                                                                      |
|---------------------|---------------------------------|-------------------------|------------------------------------------------------------------------------------------------------------------------------------------------------------------------------------------------------------------------------------------------------------------------------------------------------------------------------------------------------------------------------------------------------------------------------------------------------------------------------------------------------------------------------------------------------------------------------------------------------------------------------------------------------------------------------------------------------------------------------------------------------|
|                     |                                 |                         | <p><i>DHX9, EIF2B1, ELK1, EPB41L5, EPHA3, ERAP1, ETS1, FMN1, FOSL1, FOXA1, FOXP3, GADD45GIP1, GH1, GNAQ, HDAC9, HIP1, HNF1A, HNF1B, HOXA5, ICAM1, ICAM3, ICAM5, IL1R2, IQGAP1, IVNS1ABP, JUN, JUNB, KLF15, KPNA3, LARGE1, LCP1, LIMD2, LNPEP, LUC7L3, MAGEA11, MAP3K3, MED12L, MSS51, MTMR7, MYO10, NEDD8, NEK1, NKX2-1, NLGN1, NLGN4X, NTRK2, PAICS, PHLPP1, PIK3R1, PLAC1, PLCB1, POLD3, POU1F1, PRDM1, PRKD1, PRKN, PSMA2, PTGER3, PTPN11, PTPRS, RAB3C, RGS12, RP2, RPL8, SDK1, SELP, SEMA3E, SEMA4A, SHROOM3, SNTB1, SORCS3, SPAG9, STAT4, SUCLG1, TIAM1, TICRR, TJP2, TNFRSF8, TPP2, USP33, UTRN, VAMP4, VCL, VTI1A, WNT2, WWOX, YY1, ZNF148</i></p>                                                                                           |
| chondroitin sulfate | chemical - endogenous mammalian | 8.12 x 10 <sup>-6</sup> | <p><i>ABCA4, AHR, ALDH4A1, APBB2, ARHGEF9, ARID5B, ATF1, ATF3, ATP6V1H, ATXN1, BCAR3, BRF2, CACNB2, CALR, CAMK2D, CAST, CD46, CD80, CDC42BPB, CEBPA, CEBPB, CHI3L2, CHMP4A, CIT, CLSTN2, CNOT4, CNTNAP2, COL14A1, CSRP2, CXCL9, DAB1, DHX9, EIF2B1, EP400, EPHA3, ETS1, ETS2, F2RL3, F5, FMN1, FOXA1, FOXJ1, FOXO4, GABRA1, GADD45GIP1, GATA1, GBX1, GLCCI1, GMPR, GNAI2, GNAQ, HDAC9, HIP1, HNF1A, HNF1B, ICAM1, ICAM3, IQGAP1, IRF2, JUNB, KCNN2, KLF15, KPNA3, LARGE1, LCP1, LEP, LIMD2, LNPEP, LRP2, MAGEA11, MAP3K3, MAPKAP1, MDGA1, MFAP3, MIGA1, MOG, MSS51, MTMR7, MYC, MYO10, NEDD8, NEK1, NFATC2, NLGN1, NLGN4X, NOD1, NSG1, PAFAH1B1, PAICS, PIK3R1, PLCB1, PLCH1, PPAT, PPM1H, PRDM1, PRKD1, PRKN, PSMA2, PTGER3, PTPN11, PTPRS,</i></p> |

|          |           |                         |                                                                                                                                                                                                                                                                                                                                                                                                                                                                                                                                                                                                                                                                         |
|----------|-----------|-------------------------|-------------------------------------------------------------------------------------------------------------------------------------------------------------------------------------------------------------------------------------------------------------------------------------------------------------------------------------------------------------------------------------------------------------------------------------------------------------------------------------------------------------------------------------------------------------------------------------------------------------------------------------------------------------------------|
|          |           |                         | <i>RAB10, RAB3C, RAD23A, RAG2, RASGRF1, RBP1, RGS12, RPE65, RPL8, SCRIB, SHROOM3, SLC38A3, SMARCD2, SORCS3, SPAG9, ST3GAL5, ST8SIA5, STC1, SUCLG1, SV2C, TBP, TFAP2A, THRB, TIAM1, TJP2, TNFRSF8, UPK1B, USP33, VAMP4, WNT2, YY1</i>                                                                                                                                                                                                                                                                                                                                                                                                                                    |
| FAIM     | other     | 8.14 × 10 <sup>-6</sup> | <i>CAST, CD80, CEBPB, CXCL9, ELK1, ETS1, FHIT, FOS, FOSL1, FOXM1, FOXP3, GATA2, HES1, ICAM1, IRF1, JUN, LEP, MYC, PGR, RAG1, UTRN, WT1, ZEB1</i>                                                                                                                                                                                                                                                                                                                                                                                                                                                                                                                        |
| Selectin | group     | 8.17 × 10 <sup>-6</sup> | <i>CEBPB, DBP, ELK1, FOS, IRF1, JUN, JUNB, LEP, MYC, NR3C1, POU1F1</i>                                                                                                                                                                                                                                                                                                                                                                                                                                                                                                                                                                                                  |
| C4A/C4B  | peptidase | 8.21 × 10 <sup>-6</sup> | <i>ATF6, CALR, CD46, CD80, CEBPA, CEBPB, ELK1, ETS1, FOS, FOSL1, ICAM1, JUN, JUNB, JUND, LEP, MYC, SELP, TBP, ZEB1</i>                                                                                                                                                                                                                                                                                                                                                                                                                                                                                                                                                  |
| CCL18    | cytokine  | 8.33 × 10 <sup>-6</sup> | <i>ABCA4, ABL1, AFAP1, ALDH4A1, ANKH, ANXA7, APBB2, API5, ARHGEF9, ATP6V0D2, ATP6V1H, BCAR3, BCL11B, BMP6, BRF2, CAMK2D, CDC42BPB, CHI3L2, CHMP4A, CLEC7A, CNOT4, COL14A1, CREM, CSRP2, DAB1, DGKI, EIF2B1, EP400, EYA4, F2RL3, FAM171A1, FHIT, FMN1, FOS, FOXA2, FOXO4, GABRA1, GNAQ, GRIA4, HIP1, HNF1A, HNF4A, ICAM1, ICAM3, ICAM5, IQGAP1, IRF2, IVNS1ABP, JUN, KCND2, KCNIP4, KLF15, KLHL1, KPNA3, LIMD2, LRP2, LUC7L3, MAGEA11, MAP3K3, MARCH3, MOG, MTMR7, MYO10, NEDD8, NEK1, NFIA, NKX2-1, NLGN1, NLGN4X, NTRK2, PAICS, PDCD4, PFKP, PHLPP1, PIK3R1, PLCB1, POLD3, POU1F1, PPAT, PPM1H, PRKD1, PRKG1, PRKN, PTGER3, PTPN11, PTPRS, QKI, RAB3C, RAG1, RAG2,</i> |

|                |                           |                         |                                                                                                                                                                                                                                                                                                                                                                             |
|----------------|---------------------------|-------------------------|-----------------------------------------------------------------------------------------------------------------------------------------------------------------------------------------------------------------------------------------------------------------------------------------------------------------------------------------------------------------------------|
|                |                           |                         | <i>RGS12, RPE65, RPL8, RXRA, SCRIB, SHROOM3, SORCS3, SP1, SPAG9, STAT4, STC1, SUCLG1, TCF7L2, THRB, TNFRSF8, TPP2, UTRN, VCL, WNT2, WWOX, ZFP57, ZNF148</i>                                                                                                                                                                                                                 |
| COPS6          | other                     | 8.85 x 10 <sup>-6</sup> | <i>CEBPB, ELK1, ETS1, FHIT, FOS, FOSL1, FOXM1, GATA2, HES1, ICAM1, JUN, LEP, MYC, PGR, RAG1, UTRN, WT1, ZEB1</i>                                                                                                                                                                                                                                                            |
| TGX-221        | chemical kinase inhibitor | 8.85 x 10 <sup>-6</sup> | <i>CEBPB, ELK1, ETS1, FHIT, FOS, FOSL1, FOXM1, GATA2, HES1, JUN, LEP, MYC, PGR, RAG1, SELP, UTRN, WT1, ZEB1</i>                                                                                                                                                                                                                                                             |
| PPP3CB         | phosphatase               | 8.86 x 10 <sup>-6</sup> | <i>AHR, ATF3, ATP6V0D2, BMP6, CAMK2D, CEBPA, CEBPB, CREM, EPHA3, FOS, FOXA2, FOXM1, GATA2, HNF1A, HNF1B, ICAM1, IRF1, JUN, JUNB, LEP, NFATC2, NR3C1, POU1F1, PRDM1, RBL2, TGFB2, UTRN</i>                                                                                                                                                                                   |
| WY X 10-125132 | chemical kinase inhibitor | 9.16 x 10 <sup>-6</sup> | <i>AHR, CEBPA, CEBPB, ELK1, ETS1, FHIT, FOS, FOSL1, FOXM1, GATA2, HES1, IRF1, JUN, KCND2, LEP, MOG, MYC, PFKP, PGR, PHLPP1, RAG1, UTRN, WT1, ZEB1</i>                                                                                                                                                                                                                       |
| VLDL           | complex                   | 9.17 x 10 <sup>-6</sup> | <i>CD80, CEBPB, ELK1, ETS1, FHIT, FOS, FOSL1, FOXM1, GATA2, HNF4A, ICAM1, JUND, LEP, PGR, RAG1, RBP1, RXRA, TBP, UTRN, WT1, ZEB1</i>                                                                                                                                                                                                                                        |
| ZFHX3          | transcription regulator   | 9.21 x 10 <sup>-6</sup> | <i>ABCA4, ACER1, ACTG1, AHR, ALDH4A1, APBB2, ARHGEF9, ATF6, ATP6V1H, ATXN1, BCAR3, CAMK2D, CD46, CDC42BPB, CHMP4A, CIT, CLEC7A, CNOT4, COL14A1, CREM, CXCL9, DGKI, EIF2B1, ELK1, EPHA3, ERAP1, ETS1, EYA4, FMN1, FOS, FOXA2, FOXO4, FOXP3, GATA2, GGCT, GNAQ, HDAC9, HNF1B, HNF4A, ICAM1, ICAM3, ICAM5, IL1R2, IQGAP1, KPNA3, LRP2, MAP3K3, NEDD8, NEK1, NFATC2, NLGN1,</i> |

|                |                                       |                         |                                                                                                                                                                                                                                                                                                                                                                                                                                                                                                                                                                                                                                                                                                                                                                                                                                                                                                                                                                                                             |
|----------------|---------------------------------------|-------------------------|-------------------------------------------------------------------------------------------------------------------------------------------------------------------------------------------------------------------------------------------------------------------------------------------------------------------------------------------------------------------------------------------------------------------------------------------------------------------------------------------------------------------------------------------------------------------------------------------------------------------------------------------------------------------------------------------------------------------------------------------------------------------------------------------------------------------------------------------------------------------------------------------------------------------------------------------------------------------------------------------------------------|
|                |                                       |                         | <p>NLGN4X, NR3C1, PAX5, PDCD4, PFKP, PGR, PLAC1, PLCB1, POU1F1, PRKD1, PRKG1, PRKN, PSMA2, PTGER3, PTPN11, QKI, RAD23A, RAG1, RBP1, RGS12, RPE65, SCRIB, SELP, SEMA3E, SHROOM3, SMARCD2, SP1, SPAG9, ST8SIA5, SUCLG1, TCF7L2, TFAP2A, TGFB2, THRB, TJP2, TNFRSF8, TPP2, UTRN, VCL, WNT2, WT1, ZEB1</p>                                                                                                                                                                                                                                                                                                                                                                                                                                                                                                                                                                                                                                                                                                      |
| Ube3           | group                                 | 9.32 × 10 <sup>-6</sup> | <p>CEBPB, ELK1, ETS1, FHIT, FOS, FOSL1, FOXM1, GATA2, HES1, ICAM1, JUN, LEP, MYC, PGR, RAG1, UTRN, WT1, ZEB1</p>                                                                                                                                                                                                                                                                                                                                                                                                                                                                                                                                                                                                                                                                                                                                                                                                                                                                                            |
| beta-estradiol | chemical -<br>endogenous<br>mammalian | 9.34 × 10 <sup>-6</sup> | <p>ABCA4, ABL1, ACER1, ADM2, AFAP1, AHR, ALDH4A1, ANKS1B, APBB2, API5, ARHGEF9, ARID5B, ATF1, ATF6, ATP6V1H, ATXN1, BCAR3, BCL11B, BRF2, CD276, CDC42BPB, CEBPA, CEBPB, CHI3L2, CHMP4A, CIT, CLEC7A, CNOT4, CNTNAP2, CORO7/CORO7-PAM16, CREM, CSRP2, DGKI, DHX9, EIF2B1, EPHA3, ETS1, EYA4, F5, FAM171A1, FEM1B, FHIT, FMN1, FOS, FOXA1, FOXA2, FOXM1, FOXO4, FOXP3, FRK, GADD45GIP1, GGCT, GH1, GIPC2, GNAQ, GRIK2, HDAC9, HES1, HIP1, HNF1A, HNF1B, ICAM1, ICAM5, IL1R2, IPO4, IQGAP1, IRF1, IVNS1ABP, JUN, JUNB, JUND, KIR3DL1, KLF15, KPNA3, LARGE1, LIMD2, LRP2, LUC7L3, MAP3K3, MDGA1, MIGA1, MOG, MSS51, MTMR7, MYC, MYO10, NEDD8, NEK1, NKX2-1, NLGN1, NLGN4X, NR3C1, NXPH1, PAFAH1B1, PAICS, PDCD4, PFKP, PGR, PIK3R1, PLA2R1, PLAC1, PLCB1, POLD3, POU1F1, PPAT, PRKD1, PRKG1, PRKN, PSMA2, PTGER3, PTPN11, PTPRS, RAB3C, RAD23A, RAG1, RASGRF1, RBL2, RGS12, RP2, RPE65, RPL8, RXRA, SCRIB, SELP, SEMA3E, SEMA4A, SHOC2, SHROOM3, SLC25A15, SORCS3, SPAG9, STAT4, STC1, SUCLG1, SV2C, SYNE1,</p> |

|                                               |                                   |                       |                                                                                                                                                                                                                                                                                                         |
|-----------------------------------------------|-----------------------------------|-----------------------|---------------------------------------------------------------------------------------------------------------------------------------------------------------------------------------------------------------------------------------------------------------------------------------------------------|
|                                               |                                   |                       | <i>TCF7L2, TGFB2, TJP2, TNFRSF8, TPP2, USP33, UTRN, VAMP4, WNT2, WWOX, ZEB1, ZNF148, ZNF536</i>                                                                                                                                                                                                         |
| IGFBP5                                        | other                             | $9.4 \times 10^{-6}$  | <i>ATF3, ATF6, CALR, CD46, CD80, CLEC7A, CXCL9, DBP, ELK1, FHIT, FOS, FOXM1, GATA2, GNAI2, HES1, ICAM1, JUNB, JUND, KLF15, NFATC2, NOD1, NR3C1, PGR, PIK3R1, POU1F1, PRDM1, RAG1, RBP1, SORCS3, TBP, UTRN, WT1</i>                                                                                      |
| RAPSN                                         | other                             | $9.49 \times 10^{-6}$ | <i>CEBPB, DBP, FOS, GH1, JUN, JUNB, LEP, MYC, NR3C1, POU1F1</i>                                                                                                                                                                                                                                         |
| ESR1                                          | ligand-dependent nuclear receptor | $9.74 \times 10^{-6}$ | <i>ABCA4, ARHGEF9, ATF3, ATP6V1H, CDC42BPB, CEBPA, CEBPB, CHMP4A, CIT, CLEC7A, CNOT4, FMN1, FOS, FOXM1, FOXO4, FOXP3, GNAQ, ICAM1, IQGAP1, IRF1, JUN, JUNB, JUND, KPNA3, LEP, MAP3K3, MYC, NEK1, NLGN1, NLGN4X, PDCD4, PGR, PLCB1, PTGER3, RBL2, ROBO1, SP1, SPAG9, TCF7L2, TGFB2, THRB, TJP2, TPP2</i> |
| KRT18                                         | other                             | $9.91 \times 10^{-6}$ | <i>ALDH4A1, CD80, CEBPB, ELK1, ETS1, FHIT, FOS, FOSL1, FOXM1, GATA2, HNF4A, ICAM1, JUND, LEP, PGR, RAG1, RBP1, RXRA, TBP, UTRN, WT1, ZEB1</i>                                                                                                                                                           |
| miR-20 5-5p (and other miRNAs w/seed CCUUCAU) | mature microRNA                   | $9.91 \times 10^{-6}$ | <i>ATP6V0D2, CEBPA, CEBPB, ELK1, ETS1, FHIT, FOSL1, FOXM1, FOXP3, GATA2, HES1, JUN, JUNB, LEP, PGR, PHLPP1, RAG1, RBL2, TGFB2, UTRN, WT1, ZEB1</i>                                                                                                                                                      |
| ARNTL                                         | transcription regulator           | $1.00 \times 10^{-5}$ | <i>CEBPA, CEBPB, DBP, ELK1, ETS1, FHIT, FOSL1, FOXM1, GATA2, HES1, JUN, LEP, MYC, NKX2-1, PGR, RAG1, UTRN, WT1, ZEB1</i>                                                                                                                                                                                |



|              |             |                         |                                                                                                                                                                                                                                                                                                                                                                                    |
|--------------|-------------|-------------------------|------------------------------------------------------------------------------------------------------------------------------------------------------------------------------------------------------------------------------------------------------------------------------------------------------------------------------------------------------------------------------------|
| UBE2G2       | enzyme      | 1.03 x 10 <sup>-5</sup> | AHR, ANKS1B, ATF3, ATF6, ATP6V0D2, ATXN1, BCAR3, CALR, CAST, CD46, CD80, CIT, CREM, CXCL9, DBP, ELK1, EP400, ERAP1, ETS2, FHIT, FOXA1, FOXA2, FOXM1, GABRA1, GATA1, GLCCI1, GNAI2, HDAC9, HIP1, ICAM3, IL1R2, IRF1, JUNB, JUND, KLF15, MYO10, NFATC2, NKX2-1, NR3C1, PAX5, PFKP, PGR, PPM1H, PRDM1, RAB3C, RAG1, RAG2, RBL2, SELP, SORCS3, STAT4, STC1, TBP, TGFB2, UTRN, VCL, YY1 |
| Neurotrophin | group       | 1.09 x 10 <sup>-5</sup> | AHR, ATF6, BCAR3, BCL11B, BMP6, CALR, CREM, CXCL9, DBP, DHX9, EPHA3, ERAP1, FHIT, FOS, FOSL1, FOXM1, FOXP3, GATA2, GNAQ, GRIA4, HDAC9, HES1, HIP1, HNF4A, ICAM3, IRF1, JUNB, JUND, LEP, MYC, NR3C1, NTRK2, PAFAH1B1, PDCD4, PGR, POU1F1, PRDM1, PRKG1, RAB3C, RAG1, RBL2, RBP1, RXRA, SCRIB, SELP, SEMA3E, SP1, STAT4, TBP, TFAP2A, TMED2, UTRN, WT1, ZEB1                         |
| WWP2         | enzyme      | 1.09 x 10 <sup>-5</sup> | CAST, CD80, CEBPA, CLEC7A, CREM, CXCL9, DAB1, DBP, ELK1, EP400, ERAP1, ETS1, FAM208A, FOXA1, FOXA2, FOXJ1, FOXM1, FOXO4, GATA1, GATA2, GBX1, HDAC9, HES1, HIP1, ICAM1, IL1R2, IRF1, JUNB, JUND, LCP1, MFAP3, PAX5, PDCD4, PIK3R1, PLAC1, PRDM1, RAB3C, RAG1, RAG2, RBL2, REST, ROBO1, SART1, SBF1, STAT4, SUCLG1, TNFRSF8, VAMP4, ZEB1, ZFP57, ZNF148                              |
| FLT3LG       | cytokine    | 1.10 x 10 <sup>-5</sup> | CD80, CEBPB, FOXP3, GATA1, ICAM1, PAX5, RAG1, RAG2                                                                                                                                                                                                                                                                                                                                 |
| PPM1E        | phosphatase | 1.10 x 10 <sup>-5</sup> | ATF3, CREM, FOS, FOSL1, FOXP3, HES1, JUN, JUNB                                                                                                                                                                                                                                                                                                                                     |
| IL12A        | cytokine    | 1.14 x 10 <sup>-5</sup> | ATF3, CD46, CD80, CEBPA, CEBPB, CXCL9, ELK1, ETS1, FHIT, FOSL1, FOXM1, GATA2, HES1, ICAM1, ICAM5, IRF1, JUN, JUNB,                                                                                                                                                                                                                                                                 |

|                   |                               |                         |                                                                                                                                                                                                                                                                                                                                                                                                                                                                                                                                                                                                                             |
|-------------------|-------------------------------|-------------------------|-----------------------------------------------------------------------------------------------------------------------------------------------------------------------------------------------------------------------------------------------------------------------------------------------------------------------------------------------------------------------------------------------------------------------------------------------------------------------------------------------------------------------------------------------------------------------------------------------------------------------------|
|                   |                               |                         | <i>KLF15, LEP, NFATC2, PGR, PRDM1, RAG1, RBP1, SORCS3, STAT4, TBP, TPP2, UTRN, VAMP4, WT1, ZEB1</i>                                                                                                                                                                                                                                                                                                                                                                                                                                                                                                                         |
| SIGMAR1           | transmembrane receptor        | 1.15 × 10 <sup>-5</sup> | <i>ATF3, CEBPB, ELK1, ETS1, FHIT, FOSL1, FOXM1, GATA2, HES1, JUN, LEP, MYC, NTRK2, PGR, RAG1, UTRN, WT1, ZEB1</i>                                                                                                                                                                                                                                                                                                                                                                                                                                                                                                           |
| AR <sup>-12</sup> | chemical kinase inhibitor     | 1.16 × 10 <sup>-5</sup> | <i>ANKH, CEBPB, ELK1, ETS1, FHIT, FOSL1, FOXM1, FOXP3, GATA2, GRIA4, HES1, JUN, JUND, KLF15, LEP, NFATC2, PAX5, PDCD4, PGR, RAG1, RAG2, SP1, TGFB2, UTRN, WT1, ZEB1</i>                                                                                                                                                                                                                                                                                                                                                                                                                                                     |
| acetic acid       | chemical endogenous mammalian | 1.20 × 10 <sup>-5</sup> | <i>FOS, JUN, JUNB, LEP</i>                                                                                                                                                                                                                                                                                                                                                                                                                                                                                                                                                                                                  |
| SPI1              | transcription regulator       | 1.25 × 10 <sup>-5</sup> | <i>BCL11B, BMP6, CALR, CAMK2D, CEBPA, CEBPB, ELK1, FOS, FOSL1, FOXO4, FOXP3, GATA1, GATA2, GH1, HES1, IL1R2, IRF1, JUN, JUNB, JUND, LEP, MYC, MYO10, PAX5, PKHD1, PRDM1, RAG1, RAG2, RBP1, SELP, STAT4, TBP, TJP2</i>                                                                                                                                                                                                                                                                                                                                                                                                       |
| RPS6KA4           | kinase                        | 1.25 × 10 <sup>-5</sup> | <i>ACTG1, AFAP1, AHR, API5, ARHGAP24, ATF1, ATF6, ATP6V0D2, ATP7B, BCAR3, BMP6, BRF2, CALR, CD276, CD46, CD80, CEBPA, CEBPB, CHI3L2, CIT, CLEC7A, CXCL9, DBP, ELK1, EPB41L5, EPHA3, ERAP1, ETS1, FEM1B, FOS, FOSL1, FOXA1, FOXO4, GABRA1, GADD45GIP1, GH1, GLCCI1, GNAI2, GRIK2, HDAC9, HIP1, HNF1B, ICAM1, ICAM5, IL1R2, IRF1, IRF2, JUN, JUNB, KCND2, LARGE1, LCP1, LEP, LIMD2, MAGEA11, MARCH3, MDGA1, MIGA1, MSS51, MTMR7, MYC, NKX2-1, NR3C1, NTRK2, PAFAH1B1, PAX5, PGR, PHLPP1, PIK3R1, PKHD1, PKIA, PRDM1, PSMA2, RAB3C, RAG2, RASGRF1, RBP1, ROBO1, RPL8, RXRA, SELP, SEMA3E, SEMA4A, SLC38A3, SMARCD2, SNTB1,</i> |

|       |                                             |                       |                                                                                                                                     |
|-------|---------------------------------------------|-----------------------|-------------------------------------------------------------------------------------------------------------------------------------|
|       |                                             |                       | <i>SORCS3, ST3GAL5, ST8SIA5, STAT4, STC1, SV2C, TFAP2A, TIAM1, TICRR, TMED2, TNFRSF8, TPP2, UTRN, VAMP4, WT1, WWOX, YY1, ZNF148</i> |
| NR5A2 | ligand-<br>dependent<br>nuclear<br>receptor | $1.25 \times 10^{-5}$ | <i>CEBPB, FOS, FOXA2, HNF1A, HNF4A, ICAM1, JUN, JUNB, MYC</i>                                                                       |

<sup>1</sup>Master regulators are molecules that control multiple genes in heifer conception rate as identified by the Ingenuity Pathway Analysis through direct or indirect relationships with other molecules.

<sup>2</sup>Molecule type of the master regulator as defined by the Ingenuity Pathway Analysis

<sup>3</sup>Significance value with Bonferroni correction ( $p < 1.25 \times 10^{-5}$ )

<sup>4</sup>List of positional candidate genes from the genome wide association analysis and transcription binding factor sites regulated by each master regulator
